# Supplementary material for: Epidemiology of Opioid Prescribing After Discharge From Surgical Procedures Among Adults
Source: PubMed Central journal article supplement — JAMA Netw Open. 2024 Jun 26;7(6):e2417651. doi: 10.1001/jamanetworkopen.2024.17651 (PMC11208979; doi:10.1001/jamanetworkopen.2024.17651), 2024-06-26
Supplement: jamanetwopen-e2417651-s002.pdf [file jamanetwopen-e2417651-s002.pdf]

## Supplemental Online Content

Alessio-Bilowus D, Chua K, Peahl A, et al. Epidemiology of opioid prescribing after discharge from surgical procedures among adults. *JAMA Netw Open*. 2024;7(6):e2417651. doi:10.1001/jamanetworkopen.2024.17651

**eFigure.** Study Cohort Flowchart

**eAppendix 2.** Complete List of Outcomes for All Procedure Types

**eAppendix 4.** List of Opioids and Their MME Conversion Factors

This supplemental material has been provided by the authors to give readers additional information about their work.

**eFigure. Study Cohort Flowchart**

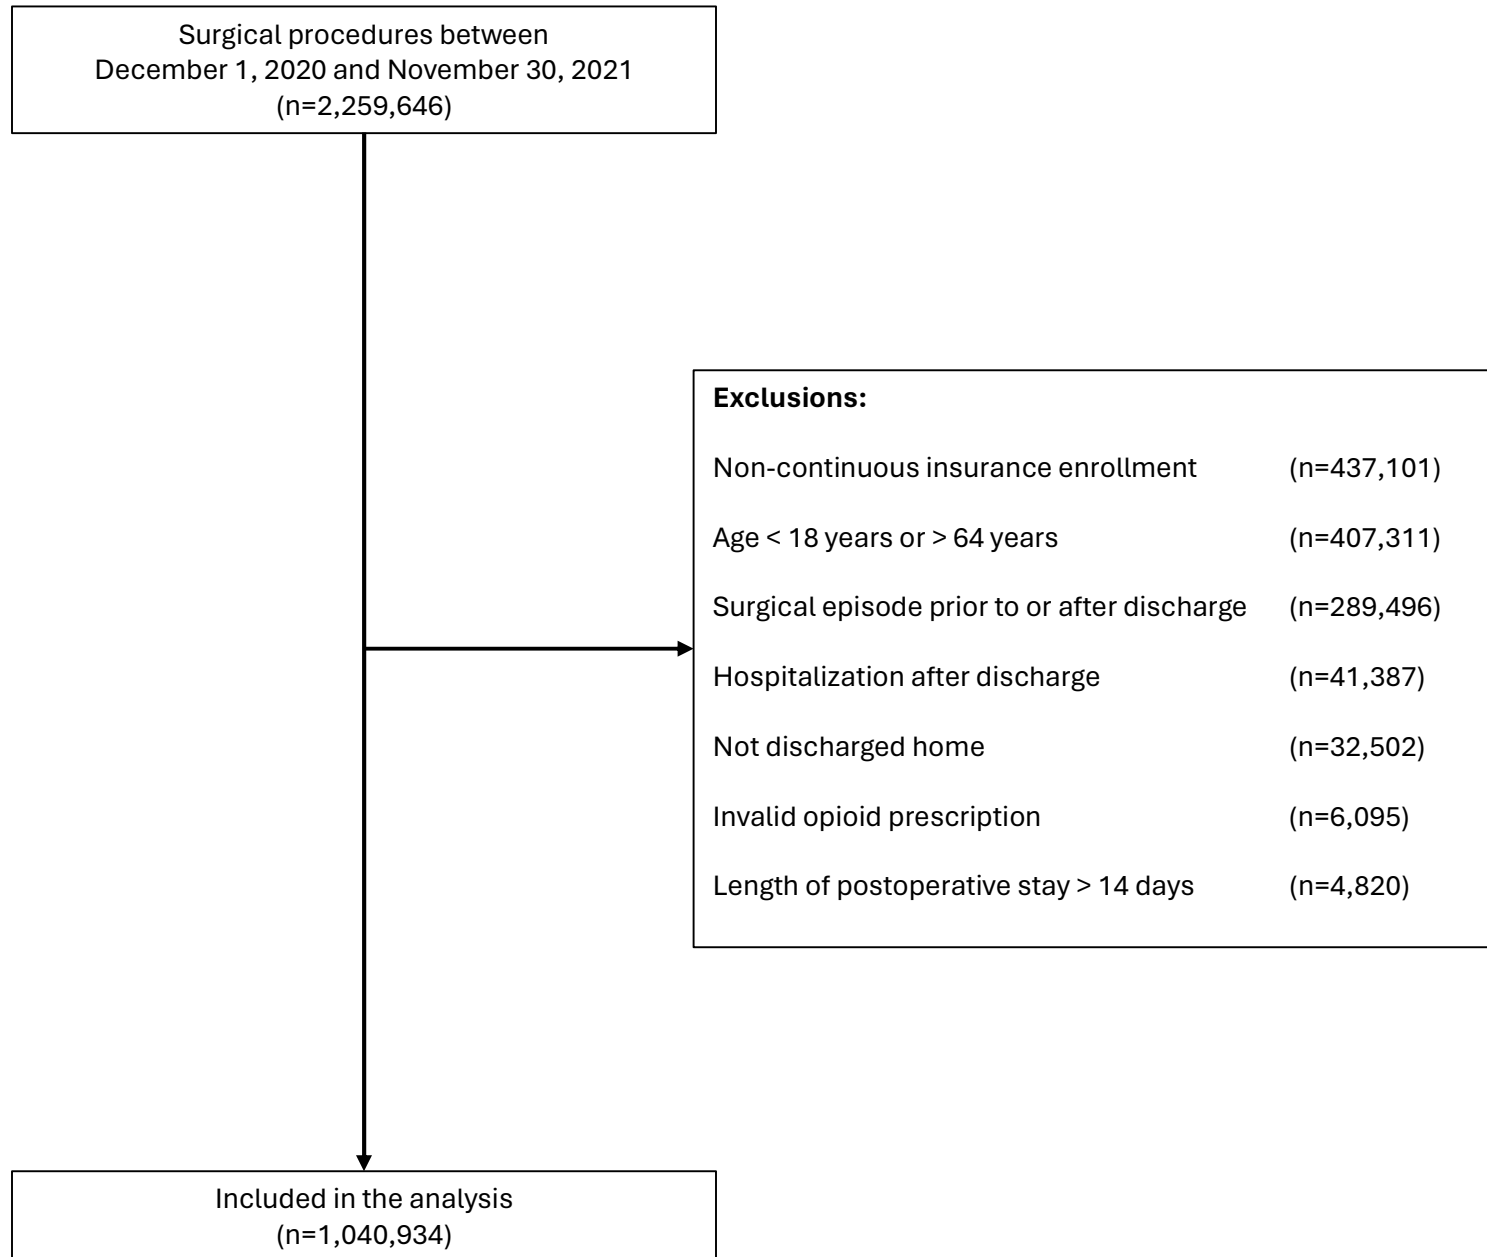

## eAppendix 2. Complete List of Outcomes for All Procedure Types

| Complete list of outcomes for all surgical procedures |                                                                                                                   |                      |                        |                        |             |                           |                                 |                         |                      |                                                   |
|-------------------------------------------------------|-------------------------------------------------------------------------------------------------------------------|----------------------|------------------------|------------------------|-------------|---------------------------|---------------------------------|-------------------------|----------------------|---------------------------------------------------|
| Age group                                             | Procedure                                                                                                         | Number of procedures | Opioid dispensing rate | Mean MME per procedure | Refill rate | Opioid-benzo overlap rate | Share of all surgical opioid Rx | Share of all total MMEs | Share of all refills | Share of all procedures with opioid-benzo overlap |
| 18 to 44 years                                        | Cesarean section                                                                                                  | 95720                | 58.9%                  | 119.3                  | 3.1%        | 0.3%                      | 22.2%                           | 19.4%                   | 7.7%                 | 2.9%                                              |
| 18 to 44 years                                        | Hysterectomy - laparoscopic or vaginal                                                                            | 29464                | 69.1%                  | 134.8                  | 6.2%        | 2.9%                      | 8.0%                            | 6.8%                    | 5.5%                 | 9.7%                                              |
| 18 to 44 years                                        | Cholecystectomy - laparoscopic                                                                                    | 24523                | 75.2%                  | 141.1                  | 4.3%        | 2.4%                      | 7.3%                            | 5.9%                    | 2.9%                 | 6.8%                                              |
| 18 to 44 years                                        | Arthroscopy of knee                                                                                               | 20486                | 57.5%                  | 179.7                  | 8.9%        | 1.7%                      | 4.7%                            | 6.3%                    | 6.3%                 | 4.0%                                              |
| 18 to 44 years                                        | Appendectomy - laparoscopic                                                                                       | 10787                | 68.2%                  | 118.2                  | 2.8%        | 1.4%                      | 2.9%                            | 2.2%                    | 0.8%                 | 1.7%                                              |
| 18 to 44 years                                        | Rhinoplasty                                                                                                       | 12851                | 57.2%                  | 123.6                  | 3.3%        | 1.9%                      | 2.9%                            | 2.7%                    | 1.2%                 | 2.9%                                              |
| 18 to 44 years                                        | Tonsillectomy and/or adenoidectomy                                                                                | 10045                | 64.0%                  | 229.6                  | 16.1%       | 1.1%                      | 2.5%                            | 3.9%                    | 4.1%                 | 1.3%                                              |
| 18 to 44 years                                        | Nerve decompression                                                                                               | 7530                 | 62.0%                  | 125.1                  | 8.6%        | 3.3%                      | 1.8%                            | 1.6%                    | 2.2%                 | 2.8%                                              |
| 18 to 44 years                                        | Open treatment of fracture, lower extremity                                                                       | 7679                 | 59.5%                  | 224.2                  | 18.0%       | 2.0%                      | 1.8%                            | 2.9%                    | 5.2%                 | 1.8%                                              |
| 18 to 44 years                                        | Arthroscopy of shoulder                                                                                           | 7870                 | 57.0%                  | 192.3                  | 13.0%       | 2.5%                      | 1.8%                            | 2.6%                    | 3.7%                 | 2.2%                                              |
| 18 to 44 years                                        | Open treatment of fracture, upper extremity                                                                       | 7099                 | 61.0%                  | 192.4                  | 11.3%       | 1.6%                      | 1.7%                            | 2.3%                    | 3.0%                 | 1.3%                                              |
| 18 to 44 years                                        | Hernia repair, abdominal - open                                                                                   | 5885                 | 72.5%                  | 149.1                  | 6.5%        | 2.4%                      | 1.7%                            | 1.5%                    | 1.2%                 | 1.6%                                              |
| 18 to 44 years                                        | Laparoscopic fulguration or excision of lesions of the ovary, pelvic viscera, or peritoneal surface by any method | 6481                 | 65.4%                  | 118.1                  | 4.8%        | 2.4%                      | 1.7%                            | 1.3%                    | 1.0%                 | 1.8%                                              |
| 18 to 44 years                                        | Laminectomy/corpectomy                                                                                            | 6030                 | 64.7%                  | 237.4                  | 19.6%       | 7.0%                      | 1.5%                            | 2.4%                    | 4.7%                 | 4.8%                                              |
| 18 to 44 years                                        | Gastric bypass                                                                                                    | 7846                 | 47.3%                  | 107.7                  | 3.3%        | 2.2%                      | 1.5%                            | 1.4%                    | 0.7%                 | 2.0%                                              |
| 18 to 44 years                                        | Hernia repair, abdominal - laparoscopic                                                                           | 3653                 | 78.5%                  | 165.9                  | 11.1%       | 3.6%                      | 1.1%                            | 1.0%                    | 1.2%                 | 1.5%                                              |
| 18 to 44 years                                        | Removal of implant; deep (eg, buried wire, pin, screw, metal band, nail, rod or plate)                            | 4761                 | 54.3%                  | 164.2                  | 7.5%        | 2.2%                      | 1.0%                            | 1.3%                    | 1.4%                 | 1.2%                                              |
| 18 to 44 years                                        | Hernia repair, inguinal/femoral - laparoscopic                                                                    | 3389                 | 74.7%                  | 144.1                  | 4.0%        | 1.4%                      | 1.0%                            | 0.8%                    | 0.4%                 | 0.6%                                              |
| 18 to 44 years                                        | Mammoplasty, augmentation                                                                                         | 4712                 | 48.5%                  | 106.0                  | 4.3%        | 1.7%                      | 0.9%                            | 0.8%                    | 0.6%                 | 0.9%                                              |
| 18 to 44 years                                        | Excision of breast lesion                                                                                         | 3912                 | 54.2%                  | 67.9                   | 3.6%        | 1.9%                      | 0.8%                            | 0.5%                    | 0.4%                 | 0.8%                                              |
| 18 to 44 years                                        | Excision of pilonidal cyst or sinus                                                                               | 2834                 | 67.5%                  | 129.8                  | 7.3%        | 1.4%                      | 0.8%                            | 0.6%                    | 0.7%                 | 0.4%                                              |
| 18 to 44 years                                        | Laparoscopic fulguration of oviducts (with or without transection)                                                | 2759                 | 67.0%                  | 96.5                   | 2.6%        | 1.4%                      | 0.7%                            | 0.5%                    | 0.2%                 | 0.5%                                              |
| 18 to 44 years                                        | Ectopic pregnancy surgery                                                                                         | 2579                 | 71.6%                  | 116.0                  | 4.0%        | 0.9%                      | 0.7%                            | 0.5%                    | 0.3%                 | 0.3%                                              |
| 18 to 44 years                                        | Thyroidectomy, with or without lymphadenectomy                                                                    | 2900                 | 62.8%                  | 96.9                   | 3.2%        | 2.1%                      | 0.7%                            | 0.5%                    | 0.3%                 | 0.7%                                              |
| 18 to 44 years                                        | Arthrodesis of spine                                                                                              | 2674                 | 60.7%                  | 241.2                  | 26.9%       | 11.1%                     | 0.6%                            | 1.1%                    | 2.9%                 | 3.4%                                              |
| 18 to 44 years                                        | Lumpectomy or mastectomy                                                                                          | 2641                 | 58.5%                  | 108.6                  | 7.4%        | 4.4%                      | 0.6%                            | 0.5%                    | 0.8%                 | 1.3%                                              |
| 18 to 44 years                                        | Excision of ganglion, wrist                                                                                       | 2521                 | 60.5%                  | 105.7                  | 3.5%        | 1.5%                      | 0.6%                            | 0.5%                    | 0.3%                 | 0.4%                                              |

|                |                                                                               |      |       |       |       |      |      |      |      |      |
|----------------|-------------------------------------------------------------------------------|------|-------|-------|-------|------|------|------|------|------|
| 18 to 44 years | Hernia repair, inguinal/femoral - open                                        | 2002 | 74.5% | 168.9 | 6.0%  | 1.7% | 0.6% | 0.6% | 0.4% | 0.4% |
| 18 to 44 years | Correction of hallux rigidus                                                  | 2772 | 51.8% | 151.6 | 11.8% | 2.5% | 0.6% | 0.7% | 1.1% | 0.8% |
| 18 to 44 years | Biopsy or excision of lymph node(s)                                           | 2305 | 60.4% | 94.7  | 7.7%  | 5.9% | 0.5% | 0.4% | 0.6% | 1.6% |
| 18 to 44 years | Hysterectomy - open abdominal                                                 | 2033 | 68.3% | 154.2 | 13.4% | 3.9% | 0.5% | 0.5% | 0.8% | 0.9% |
| 18 to 44 years | Excision of soft tissue lesion                                                | 2993 | 45.7% | 73.6  | 3.5%  | 1.1% | 0.5% | 0.4% | 0.3% | 0.4% |
| 18 to 44 years | Arthroscopy of hip                                                            | 2467 | 54.8% | 207.1 | 9.5%  | 6.8% | 0.5% | 0.9% | 1.0% | 1.9% |
| 18 to 44 years | Biceps tenodesis or reconstruction                                            | 2000 | 60.8% | 228.3 | 13.9% | 1.7% | 0.5% | 0.8% | 1.0% | 0.4% |
| 18 to 44 years | Laparoscopic occlusion of oviducts by device (eg, band, clip, or Falope ring) | 1621 | 68.0% | 85.0  | 2.3%  | 1.0% | 0.4% | 0.2% | 0.1% | 0.2% |
| 18 to 44 years | Surgical treatment of anal fistula                                            | 1555 | 69.9% | 163.9 | 8.3%  | 4.4% | 0.4% | 0.4% | 0.5% | 0.8% |
| 18 to 44 years | Laparoscopic abdominal procedure                                              | 1635 | 65.2% | 111.3 | 5.4%  | 2.6% | 0.4% | 0.3% | 0.3% | 0.5% |
| 18 to 44 years | Carpal tunnel release, endoscopic                                             | 1773 | 59.1% | 84.7  | 6.0%  | 3.0% | 0.4% | 0.3% | 0.4% | 0.6% |
| 18 to 44 years | Ligation or transection of fallopian tube(s)                                  | 1798 | 54.9% | 100.8 | 1.9%  | 0.3% | 0.4% | 0.3% | 0.1% | 0.1% |
| 18 to 44 years | Repair of ruptured Achilles tendon                                            | 1725 | 57.0% | 154.5 | 7.9%  | 0.6% | 0.4% | 0.5% | 0.4% | 0.1% |
| 18 to 44 years | Laparoscopic repair of paraesophageal hernia                                  | 1710 | 51.8% | 122.6 | 6.8%  | 2.7% | 0.3% | 0.4% | 0.4% | 0.5% |
| 18 to 44 years | Tympanoplasty                                                                 | 1349 | 60.0% | 101.0 | 2.9%  | 1.5% | 0.3% | 0.2% | 0.1% | 0.2% |
| 18 to 44 years | Arthroscopy of ankle or foot                                                  | 1321 | 59.0% | 160.1 | 9.3%  | 2.2% | 0.3% | 0.4% | 0.4% | 0.3% |
| 18 to 44 years | Inferior turbinate resection or excision                                      | 2134 | 35.9% | 55.8  | 2.8%  | 2.7% | 0.3% | 0.2% | 0.2% | 0.7% |
| 18 to 44 years | Open treatment of facial fractures                                            | 1276 | 59.8% | 194.9 | 8.4%  | 2.7% | 0.3% | 0.4% | 0.4% | 0.4% |
| 18 to 44 years | Arthroplasty of hip                                                           | 1208 | 61.2% | 282.8 | 28.9% | 4.8% | 0.3% | 0.6% | 1.5% | 0.7% |
| 18 to 44 years | Arthrodesis of lower extremity                                                | 1298 | 55.5% | 214.8 | 22.3% | 3.5% | 0.3% | 0.5% | 1.2% | 0.5% |
| 18 to 44 years | Sling operation for stress incontinence                                       | 1110 | 65.0% | 103.9 | 6.3%  | 4.3% | 0.3% | 0.2% | 0.2% | 0.6% |
| 18 to 44 years | Open treatment of clavicle fracture                                           | 1258 | 56.9% | 200.8 | 6.9%  | 1.0% | 0.3% | 0.4% | 0.3% | 0.1% |
| 18 to 44 years | Laparoscopic lysis of adhesions                                               | 1033 | 69.0% | 134.7 | 8.0%  | 3.9% | 0.3% | 0.2% | 0.2% | 0.5% |
| 18 to 44 years | Tendon repair, upper extremity                                                | 1156 | 61.1% | 179.8 | 9.0%  | 2.0% | 0.3% | 0.4% | 0.4% | 0.3% |
| 18 to 44 years | Ligamentous reconstruction (augmentation), knee                               | 1056 | 63.3% | 286.4 | 17.6% | 3.2% | 0.3% | 0.5% | 0.6% | 0.4% |
| 18 to 44 years | Colectomy and/or proctectomy - laparoscopic                                   | 977  | 64.8% | 137.7 | 13.2% | 3.1% | 0.2% | 0.2% | 0.5% | 0.3% |
| 18 to 44 years | Adjacent tissue transfer or rearrangement                                     | 2544 | 24.6% | 36.6  | 2.1%  | 0.9% | 0.2% | 0.2% | 0.2% | 0.3% |
| 18 to 44 years | Lipectomy, with or without excessive skin removal                             | 1021 | 59.5% | 135.8 | 16.7% | 4.9% | 0.2% | 0.2% | 0.5% | 0.6% |
| 18 to 44 years | Nerve repair                                                                  | 1012 | 56.7% | 132.9 | 9.2%  | 2.6% | 0.2% | 0.2% | 0.4% | 0.3% |
| 18 to 44 years | Myomectomy, fibroid                                                           | 1011 | 55.4% | 92.0  | 6.7%  | 1.4% | 0.2% | 0.2% | 0.2% | 0.2% |
| 18 to 44 years | Follicle puncture for oocyte retrieval                                        | 6135 | 8.9%  | 6.2   | 0.3%  | 0.3% | 0.2% | 0.1% | 0.1% | 0.2% |
| 18 to 44 years | Orchiectomy - open                                                            | 789  | 68.8% | 106.3 | 6.8%  | 2.0% | 0.2% | 0.1% | 0.2% | 0.2% |
| 18 to 44 years | Skin graft                                                                    | 1179 | 44.9% | 117.1 | 10.3% | 2.0% | 0.2% | 0.2% | 0.5% | 0.3% |

|                |                                                                      |      |       |       |       |      |      |      |      |      |
|----------------|----------------------------------------------------------------------|------|-------|-------|-------|------|------|------|------|------|
| 18 to 44 years | Trigger finger release                                               | 1024 | 51.6% | 83.6  | 4.1%  | 2.1% | 0.2% | 0.1% | 0.1% | 0.3% |
| 18 to 44 years | Excision of facial bone or tumor/cyst in facial bone                 | 842  | 62.0% | 71.1  | 5.0%  | 1.7% | 0.2% | 0.1% | 0.1% | 0.2% |
| 18 to 44 years | Tendon repair, lower extremity                                       | 905  | 56.8% | 158.1 | 13.7% | 2.9% | 0.2% | 0.2% | 0.4% | 0.3% |
| 18 to 44 years | Hand tendon repair                                                   | 739  | 69.1% | 168.7 | 9.6%  | 0.8% | 0.2% | 0.2% | 0.3% | 0.1% |
| 18 to 44 years | Craniectomy or craniotomy                                            | 867  | 58.8% | 192.8 | 14.0% | 8.4% | 0.2% | 0.3% | 0.4% | 0.8% |
| 18 to 44 years | Incision of tendon sheath of wrist                                   | 867  | 56.3% | 106.4 | 7.3%  | 2.9% | 0.2% | 0.2% | 0.2% | 0.3% |
| 18 to 44 years | Tenotomy, upper extremity                                            | 755  | 64.2% | 159.6 | 12.6% | 3.3% | 0.2% | 0.2% | 0.4% | 0.3% |
| 18 to 44 years | Graft of fat or other tissue                                         | 861  | 54.7% | 109.7 | 6.2%  | 3.6% | 0.2% | 0.2% | 0.2% | 0.4% |
| 18 to 44 years | Excision of bone cyst or benign tumor with or without bone grafting  | 776  | 58.9% | 221.6 | 9.1%  | 2.2% | 0.2% | 0.3% | 0.2% | 0.2% |
| 18 to 44 years | Arthroplasty of knee                                                 | 776  | 58.2% | 318.6 | 40.3% | 4.5% | 0.2% | 0.4% | 1.8% | 0.4% |
| 18 to 44 years | Open treatment of fracture, hip or pelvis                            | 719  | 60.6% | 236.8 | 27.0% | 2.9% | 0.2% | 0.3% | 0.7% | 0.2% |
| 18 to 44 years | Osteotomy of lower extremity                                         | 795  | 53.6% | 197.6 | 15.6% | 2.9% | 0.2% | 0.3% | 0.5% | 0.3% |
| 18 to 44 years | Fissurectomy                                                         | 591  | 69.5% | 169.6 | 6.8%  | 7.4% | 0.2% | 0.2% | 0.1% | 0.5% |
| 18 to 44 years | Nephrectomy - laparoscopic                                           | 575  | 69.4% | 146.8 | 10.8% | 1.6% | 0.2% | 0.1% | 0.2% | 0.1% |
| 18 to 44 years | Debridement of skin, muscle, or bone                                 | 1298 | 30.7% | 81.3  | 7.0%  | 1.1% | 0.2% | 0.2% | 0.4% | 0.2% |
| 18 to 44 years | Reconstruction of nonunion or malunion, upper extremity              | 569  | 69.4% | 211.2 | 12.3% | 3.3% | 0.2% | 0.2% | 0.3% | 0.2% |
| 18 to 44 years | Ostectomy of foot and/or toes                                        | 741  | 52.8% | 145.7 | 12.6% | 2.8% | 0.2% | 0.2% | 0.4% | 0.2% |
| 18 to 44 years | Repair of disrupted ligament, ankle                                  | 663  | 56.7% | 227.4 | 19.6% | 2.1% | 0.1% | 0.3% | 0.5% | 0.2% |
| 18 to 44 years | Varicocele repair                                                    | 586  | 64.2% | 84.9  | 3.8%  | 1.2% | 0.1% | 0.1% | 0.1% | 0.1% |
| 18 to 44 years | Excision of salivary tumor or salivary gland                         | 556  | 67.1% | 109.3 | 5.6%  | 2.9% | 0.1% | 0.1% | 0.1% | 0.2% |
| 18 to 44 years | Arthroplasty of spine                                                | 587  | 63.4% | 315.2 | 20.3% | 7.5% | 0.1% | 0.3% | 0.4% | 0.5% |
| 18 to 44 years | Breast implant                                                       | 723  | 50.5% | 113.1 | 5.1%  | 6.8% | 0.1% | 0.1% | 0.1% | 0.6% |
| 18 to 44 years | Fasciectomy or fasciotomy                                            | 686  | 53.2% | 111.3 | 10.6% | 2.3% | 0.1% | 0.1% | 0.3% | 0.2% |
| 18 to 44 years | Arthroscopy of wrist                                                 | 535  | 65.2% | 144.4 | 9.2%  | 2.8% | 0.1% | 0.1% | 0.1% | 0.2% |
| 18 to 44 years | Vulvectomy                                                           | 637  | 54.3% | 75.6  | 8.2%  | 3.0% | 0.1% | 0.1% | 0.2% | 0.2% |
| 18 to 44 years | Arteriovenous fistula creation or reconstruction                     | 529  | 63.1% | 103.2 | 6.6%  | 2.3% | 0.1% | 0.1% | 0.1% | 0.1% |
| 18 to 44 years | Repair or reconstruction of collateral ligament, hand and/or fingers | 517  | 63.2% | 139.6 | 7.2%  | 1.0% | 0.1% | 0.1% | 0.1% | 0.1% |
| 18 to 44 years | Excision of hydrocele                                                | 447  | 72.7% | 122.7 | 6.0%  | 0.9% | 0.1% | 0.1% | 0.1% | 0.0% |
| 18 to 44 years | Colectomy and/or proctectomy - open                                  | 509  | 63.5% | 143.0 | 15.3% | 2.8% | 0.1% | 0.1% | 0.3% | 0.2% |
| 18 to 44 years | Reconstruction of face                                               | 592  | 54.1% | 165.2 | 6.6%  | 0.8% | 0.1% | 0.2% | 0.1% | 0.1% |
| 18 to 44 years | Graft of bone or cartilage to face                                   | 482  | 65.6% | 132.0 | 6.8%  | 2.7% | 0.1% | 0.1% | 0.1% | 0.1% |
| 18 to 44 years | Bone graft procedure                                                 | 561  | 55.6% | 211.6 | 14.3% | 3.0% | 0.1% | 0.2% | 0.3% | 0.2% |
| 18 to 44 years | Laparoscopic liver procedure                                         | 646  | 47.5% | 110.7 | 5.3%  | 1.9% | 0.1% | 0.1% | 0.1% | 0.1% |

|                |                                                                          |      |       |       |       |      |      |      |      |      |
|----------------|--------------------------------------------------------------------------|------|-------|-------|-------|------|------|------|------|------|
| 18 to 44 years | Drainage of breast abscess                                               | 612  | 49.0% | 91.6  | 7.2%  | 1.5% | 0.1% | 0.1% | 0.2% | 0.1% |
| 18 to 44 years | Bone resection                                                           | 561  | 52.9% | 157.2 | 9.1%  | 2.1% | 0.1% | 0.1% | 0.2% | 0.1% |
| 18 to 44 years | Colpopexy - laparoscopic                                                 | 466  | 62.7% | 133.3 | 5.4%  | 3.4% | 0.1% | 0.1% | 0.1% | 0.2% |
| 18 to 44 years | Gastrocnemius recession                                                  | 505  | 55.8% | 172.1 | 18.8% | 4.6% | 0.1% | 0.1% | 0.4% | 0.3% |
| 18 to 44 years | Laparoscopic esophagus fundoplasty                                       | 393  | 71.8% | 161.9 | 10.9% | 3.8% | 0.1% | 0.1% | 0.2% | 0.2% |
| 18 to 44 years | Implantable cardiac device procedures                                    | 751  | 36.1% | 50.2  | 4.3%  | 2.3% | 0.1% | 0.1% | 0.1% | 0.2% |
| 18 to 44 years | Sphincteroplasty, anal                                                   | 377  | 71.1% | 152.7 | 12.7% | 8.5% | 0.1% | 0.1% | 0.2% | 0.4% |
| 18 to 44 years | Repair of fistula, oronasal or oromaxillary                              | 355  | 74.6% | 101.0 | 5.1%  | 2.5% | 0.1% | 0.1% | 0.1% | 0.1% |
| 18 to 44 years | Excision of lesion of tendon sheath or joint capsule, hand or finger     | 544  | 46.9% | 87.5  | 1.7%  | 0.7% | 0.1% | 0.1% | 0.0% | 0.0% |
| 18 to 44 years | Excision or destruction - intra-abdominal tumors, cysts or endometriomas | 426  | 56.1% | 118.7 | 7.5%  | 1.9% | 0.1% | 0.1% | 0.1% | 0.1% |
| 18 to 44 years | Laryngoscopy, with tumor excision, with or without reconstruction        | 647  | 35.2% | 69.5  | 2.9%  | 1.4% | 0.1% | 0.1% | 0.1% | 0.1% |
| 18 to 44 years | Destruction of lesion(s), anus                                           | 469  | 48.6% | 93.7  | 5.3%  | 3.6% | 0.1% | 0.1% | 0.1% | 0.2% |
| 18 to 44 years | Strabismus surgery                                                       | 1149 | 19.8% | 32.6  | 0.9%  | 1.0% | 0.1% | 0.1% | 0.0% | 0.1% |
| 18 to 44 years | Cerclage of cervix, during pregnancy                                     | 1857 | 12.0% | 18.0  | 0.3%  | 0.0% | 0.1% | 0.1% | 0.0% | 0.0% |
| 18 to 44 years | Reconstruction of nonunion or malunion, lower extremity                  | 336  | 65.8% | 273.7 | 29.2% | 2.4% | 0.1% | 0.2% | 0.5% | 0.1% |
| 18 to 44 years | Tenolysis, upper extremity                                               | 363  | 59.8% | 139.4 | 8.8%  | 2.2% | 0.1% | 0.1% | 0.1% | 0.1% |
| 18 to 44 years | Amputation of lower extremity                                            | 426  | 49.3% | 144.6 | 12.9% | 1.9% | 0.1% | 0.1% | 0.3% | 0.1% |
| 18 to 44 years | Amputation of upper extremity                                            | 345  | 60.9% | 150.9 | 13.3% | 2.3% | 0.1% | 0.1% | 0.2% | 0.1% |
| 18 to 44 years | Lymphadenectomy                                                          | 327  | 64.2% | 164.6 | 10.4% | 1.5% | 0.1% | 0.1% | 0.1% | 0.1% |
| 18 to 44 years | Mohs micrographic technique                                              | 2709 | 7.7%  | 9.5   | 0.4%  | 0.3% | 0.1% | 0.0% | 0.0% | 0.1% |
| 18 to 44 years | Reconstruction of foot                                                   | 350  | 58.6% | 192.3 | 16.6% | 2.3% | 0.1% | 0.1% | 0.2% | 0.1% |
| 18 to 44 years | Parathyroidectomy                                                        | 377  | 54.1% | 86.5  | 3.4%  | 1.1% | 0.1% | 0.1% | 0.0% | 0.0% |
| 18 to 44 years | Suture of infrapatellar tendon                                           | 330  | 60.3% | 178.4 | 14.8% | 1.8% | 0.1% | 0.1% | 0.2% | 0.1% |
| 18 to 44 years | Tubercleplasty of anterior tibia                                         | 354  | 55.4% | 169.6 | 24.3% | 3.4% | 0.1% | 0.1% | 0.3% | 0.1% |
| 18 to 44 years | Enterolysis - laparoscopic                                               | 315  | 61.6% | 131.9 | 9.8%  | 5.1% | 0.1% | 0.1% | 0.1% | 0.2% |
| 18 to 44 years | Salpingo-oophorectomy                                                    | 303  | 62.4% | 134.7 | 8.3%  | 2.0% | 0.1% | 0.1% | 0.1% | 0.1% |
| 18 to 44 years | Colporrhaphy                                                             | 368  | 50.5% | 96.8  | 7.6%  | 3.0% | 0.1% | 0.1% | 0.1% | 0.1% |
| 18 to 44 years | Replacement of tissue expander with permanent prosthesis                 | 341  | 54.5% | 144.8 | 3.5%  | 6.2% | 0.1% | 0.1% | 0.0% | 0.2% |
| 18 to 44 years | Intestinal procedure, resection and closure of enterostomy               | 312  | 59.3% | 149.4 | 10.3% | 3.2% | 0.1% | 0.1% | 0.1% | 0.1% |
| 18 to 44 years | Transcatheter placement of intravascular stent - percutaneous or open    | 529  | 34.8% | 115.8 | 5.1%  | 0.6% | 0.1% | 0.1% | 0.1% | 0.0% |
| 18 to 44 years | Repair of primary, torn ligament and/or capsule, knee                    | 319  | 57.4% | 205.7 | 13.5% | 2.5% | 0.1% | 0.1% | 0.2% | 0.1% |
| 18 to 44 years | Excision of neuroma, neurofibroma, or neurolemmoma                       | 420  | 42.9% | 112.7 | 9.0%  | 4.0% | 0.1% | 0.1% | 0.1% | 0.2% |

|                |                                                                                                                  |     |       |       |       |       |      |      |      |      |
|----------------|------------------------------------------------------------------------------------------------------------------|-----|-------|-------|-------|-------|------|------|------|------|
| 18 to 44 years | Excision of lesion, tendon, tendon sheath, or capsule; foot                                                      | 347 | 51.6% | 114.3 | 5.2%  | 1.2%  | 0.1% | 0.1% | 0.0% | 0.0% |
| 18 to 44 years | Ovarian cystectomy                                                                                               | 282 | 62.4% | 136.2 | 4.3%  | 0.0%  | 0.1% | 0.1% | 0.0% | 0.0% |
| 18 to 44 years | Arthrodesis of upper extremity                                                                                   | 239 | 73.2% | 265.3 | 23.4% | 4.2%  | 0.1% | 0.1% | 0.3% | 0.1% |
| 18 to 44 years | CSF shunt                                                                                                        | 572 | 30.1% | 80.1  | 7.0%  | 2.8%  | 0.1% | 0.1% | 0.2% | 0.2% |
| 18 to 44 years | Radical resection of tumor, soft tissue                                                                          | 302 | 56.3% | 136.0 | 8.3%  | 2.3%  | 0.1% | 0.1% | 0.1% | 0.1% |
| 18 to 44 years | Capsulorrhaphy or reconstruction, wrist                                                                          | 263 | 63.1% | 185.2 | 11.0% | 1.9%  | 0.1% | 0.1% | 0.2% | 0.1% |
| 18 to 44 years | Incision and drainage of rectal, perirectal, or perianal abscess                                                 | 251 | 62.5% | 180.5 | 13.1% | 3.2%  | 0.1% | 0.1% | 0.1% | 0.1% |
| 18 to 44 years | Claviculectomy                                                                                                   | 264 | 58.3% | 237.3 | 18.9% | 1.5%  | 0.1% | 0.1% | 0.2% | 0.0% |
| 18 to 44 years | Arthrotomy of lower extremity                                                                                    | 282 | 53.5% | 215.7 | 11.3% | 1.4%  | 0.1% | 0.1% | 0.1% | 0.0% |
| 18 to 44 years | Insertion or replacement of cranial neurostimulator pulse generator or receiver                                  | 288 | 51.4% | 103.9 | 0.7%  | 20.5% | 0.1% | 0.1% | 0.0% | 0.7% |
| 18 to 44 years | Placement, removal, revision and/or replacement of adjustable gastric restrictive device - laparoscopic          | 260 | 56.9% | 119.7 | 3.1%  | 2.7%  | 0.1% | 0.1% | 0.0% | 0.1% |
| 18 to 44 years | Excision of Bartholin's gland or cyst                                                                            | 277 | 53.1% | 103.7 | 7.2%  | 2.2%  | 0.1% | 0.0% | 0.1% | 0.1% |
| 18 to 44 years | Incision for implantation of cranial nerve (eg, vagus nerve) neurostimulator electrode array and pulse generator | 221 | 66.1% | 160.5 | 5.9%  | 19.0% | 0.1% | 0.1% | 0.0% | 0.5% |
| 18 to 44 years | Osteochondral allograft, knee - open                                                                             | 240 | 60.4% | 193.9 | 18.8% | 0.8%  | 0.1% | 0.1% | 0.2% | 0.0% |
| 18 to 44 years | Exploration of penetrating wound                                                                                 | 349 | 40.4% | 113.2 | 7.2%  | 1.4%  | 0.1% | 0.1% | 0.1% | 0.1% |
| 18 to 44 years | Laparoscopic intestinal procedure                                                                                | 227 | 62.1% | 135.2 | 11.5% | 3.5%  | 0.1% | 0.1% | 0.1% | 0.1% |
| 18 to 44 years | Orchiopexy                                                                                                       | 213 | 65.3% | 76.9  | 1.9%  | 1.4%  | 0.1% | 0.0% | 0.0% | 0.0% |
| 18 to 44 years | Endoscopic plantar fasciotomy                                                                                    | 251 | 54.6% | 106.7 | 6.4%  | 4.0%  | 0.1% | 0.0% | 0.0% | 0.1% |
| 18 to 44 years | Secondary closure of surgical wound or dehiscence                                                                | 299 | 45.2% | 112.9 | 9.4%  | 1.7%  | 0.1% | 0.1% | 0.1% | 0.1% |
| 18 to 44 years | Ligation of blood vessels                                                                                        | 248 | 54.0% | 104.2 | 8.5%  | 1.6%  | 0.1% | 0.0% | 0.1% | 0.0% |
| 18 to 44 years | Suture of quadriceps or hamstring muscle rupture                                                                 | 227 | 59.0% | 185.2 | 12.3% | 1.3%  | 0.1% | 0.1% | 0.1% | 0.0% |
| 18 to 44 years | Laparoscopic stomach procedure                                                                                   | 294 | 45.2% | 117.9 | 9.2%  | 4.1%  | 0.1% | 0.1% | 0.1% | 0.1% |
| 18 to 44 years | Tendon transfer, upper extremity                                                                                 | 187 | 70.1% | 249.6 | 16.6% | 3.7%  | 0.1% | 0.1% | 0.1% | 0.1% |
| 18 to 44 years | Breast reconstruction                                                                                            | 227 | 57.3% | 117.3 | 10.6% | 7.5%  | 0.1% | 0.0% | 0.1% | 0.2% |
| 18 to 44 years | Capsulorrhaphy, shoulder                                                                                         | 236 | 54.2% | 208.4 | 16.1% | 2.1%  | 0.1% | 0.1% | 0.1% | 0.1% |
| 18 to 44 years | Colpopexy - open                                                                                                 | 189 | 67.7% | 402.7 | 22.2% | 5.3%  | 0.1% | 0.1% | 0.1% | 0.1% |
| 18 to 44 years | Repair of retinal detachment                                                                                     | 830 | 15.3% | 23.8  | 1.2%  | 0.5%  | 0.1% | 0.0% | 0.1% | 0.0% |
| 18 to 44 years | Excision or curettage of bone cyst or benign tumor                                                               | 192 | 65.6% | 211.1 | 10.9% | 3.1%  | 0.0% | 0.1% | 0.1% | 0.1% |
| 18 to 44 years | Incision for implantation of neurostimulator electrode array                                                     | 202 | 61.4% | 101.7 | 13.4% | 11.4% | 0.0% | 0.0% | 0.1% | 0.3% |
| 18 to 44 years | Repair of ruptured musculotendinous cuff - open                                                                  | 189 | 65.6% | 235.5 | 30.7% | 3.7%  | 0.0% | 0.1% | 0.2% | 0.1% |
| 18 to 44 years | Alveoloplasty                                                                                                    | 191 | 63.9% | 86.7  | 9.9%  | 7.9%  | 0.0% | 0.0% | 0.1% | 0.2% |
| 18 to 44 years | Urethroplasty                                                                                                    | 206 | 58.7% | 108.5 | 8.3%  | 7.3%  | 0.0% | 0.0% | 0.1% | 0.2% |

|                |                                                                                         |     |       |       |       |      |      |      |      |      |
|----------------|-----------------------------------------------------------------------------------------|-----|-------|-------|-------|------|------|------|------|------|
| 18 to 44 years | Synovectomy, foot                                                                       | 238 | 50.4% | 151.2 | 10.1% | 1.3% | 0.0% | 0.1% | 0.1% | 0.0% |
| 18 to 44 years | Radical excision of bursa, synovia of wrist, or forearm                                 | 193 | 61.7% | 83.9  | 4.1%  | 2.1% | 0.0% | 0.0% | 0.0% | 0.0% |
| 18 to 44 years | Decompression fasciotomy of lower extremity                                             | 187 | 63.1% | 214.6 | 16.0% | 1.1% | 0.0% | 0.1% | 0.1% | 0.0% |
| 18 to 44 years | Arthrotomy of upper extremity                                                           | 223 | 52.0% | 199.0 | 4.9%  | 1.3% | 0.0% | 0.1% | 0.0% | 0.0% |
| 18 to 44 years | Thoracoscopy, with partial or complete lung removal                                     | 205 | 56.1% | 140.5 | 9.8%  | 2.9% | 0.0% | 0.0% | 0.1% | 0.1% |
| 18 to 44 years | Thoracoscopy, with pleurodesis                                                          | 205 | 56.1% | 166.0 | 5.4%  | 1.5% | 0.0% | 0.1% | 0.0% | 0.0% |
| 18 to 44 years | Intestinal procedure, resection and anastomosis - open                                  | 193 | 58.5% | 179.5 | 11.4% | 3.1% | 0.0% | 0.1% | 0.1% | 0.1% |
| 18 to 44 years | Repair of blepharoptosis                                                                | 407 | 27.3% | 51.5  | 1.0%  | 0.7% | 0.0% | 0.0% | 0.0% | 0.0% |
| 18 to 44 years | Exploratory laparotomy                                                                  | 204 | 54.4% | 194.0 | 13.7% | 4.4% | 0.0% | 0.1% | 0.1% | 0.1% |
| 18 to 44 years | Arthroscopy of elbow                                                                    | 183 | 60.7% | 193.2 | 6.0%  | 1.6% | 0.0% | 0.1% | 0.0% | 0.0% |
| 18 to 44 years | Excision of vaginal cyst or tumor                                                       | 356 | 30.9% | 52.7  | 3.1%  | 0.6% | 0.0% | 0.0% | 0.0% | 0.0% |
| 18 to 44 years | Fracture of nasal inferior turbinate(s)                                                 | 272 | 40.4% | 58.3  | 0.0%  | 1.5% | 0.0% | 0.0% | 0.0% | 0.0% |
| 18 to 44 years | Rib excision                                                                            | 157 | 68.8% | 160.3 | 11.5% | 8.3% | 0.0% | 0.0% | 0.1% | 0.1% |
| 18 to 44 years | Reconstruction of mandible or maxilla                                                   | 186 | 56.5% | 199.9 | 7.5%  | 2.2% | 0.0% | 0.1% | 0.1% | 0.0% |
| 18 to 44 years | Cochlear device implantation                                                            | 148 | 70.9% | 90.6  | 2.7%  | 3.4% | 0.0% | 0.0% | 0.0% | 0.1% |
| 18 to 44 years | Revision of reconstructed breast                                                        | 197 | 51.3% | 84.6  | 5.1%  | 2.5% | 0.0% | 0.0% | 0.0% | 0.1% |
| 18 to 44 years | Stapedectomy or stapedotomy                                                             | 174 | 56.9% | 103.7 | 0.6%  | 1.7% | 0.0% | 0.0% | 0.0% | 0.0% |
| 18 to 44 years | Appendectomy - open                                                                     | 171 | 57.9% | 81.2  | 4.1%  | 0.6% | 0.0% | 0.0% | 0.0% | 0.0% |
| 18 to 44 years | Excision of lesion of tendon sheath or capsule (eg, cyst or ganglion), leg and/or ankle | 172 | 57.0% | 175.1 | 11.6% | 1.7% | 0.0% | 0.1% | 0.1% | 0.0% |
| 18 to 44 years | Arthroplasty of forearm or hand                                                         | 154 | 62.3% | 182.7 | 13.6% | 3.9% | 0.0% | 0.0% | 0.1% | 0.1% |
| 18 to 44 years | Cystorrhaphy, suture of bladder wound, injury or rupture                                | 149 | 63.8% | 115.5 | 8.1%  | 2.0% | 0.0% | 0.0% | 0.1% | 0.0% |
| 18 to 44 years | Salpingectomy                                                                           | 160 | 58.8% | 79.2  | 1.9%  | 0.0% | 0.0% | 0.0% | 0.0% | 0.0% |
| 18 to 44 years | Reconstruction of dislocating patella                                                   | 134 | 70.1% | 325.7 | 17.9% | 3.7% | 0.0% | 0.1% | 0.1% | 0.1% |
| 18 to 44 years | Tendon transfer, lower extremity                                                        | 140 | 65.0% | 276.2 | 26.4% | 4.3% | 0.0% | 0.1% | 0.1% | 0.1% |
| 18 to 44 years | Excision of branchial cleft cyst, vestige, or fistula                                   | 137 | 65.7% | 112.9 | 4.4%  | 2.2% | 0.0% | 0.0% | 0.0% | 0.0% |
| 18 to 44 years | Flap reconstruction                                                                     | 192 | 46.4% | 111.1 | 7.8%  | 0.5% | 0.0% | 0.0% | 0.1% | 0.0% |
| 18 to 44 years | Osteoplasty of upper extremity                                                          | 132 | 67.4% | 199.6 | 15.2% | 0.0% | 0.0% | 0.0% | 0.1% | 0.0% |
| 18 to 44 years | Excision of rectal tumor, transanal, transsacral, transcoccygeal                        | 141 | 61.7% | 144.7 | 6.4%  | 5.0% | 0.0% | 0.0% | 0.0% | 0.1% |
| 18 to 44 years | Excision of thyroglossal duct cyst or sinus                                             | 135 | 63.7% | 116.3 | 3.7%  | 0.0% | 0.0% | 0.0% | 0.0% | 0.0% |
| 18 to 44 years | Excision of spermatocele, with or without epididymectomy                                | 125 | 68.0% | 100.5 | 4.8%  | 1.6% | 0.0% | 0.0% | 0.0% | 0.0% |
| 18 to 44 years | Implantation, removal, or replacement of osseointegrated implant, temporal bone         | 116 | 73.3% | 150.2 | 6.9%  | 3.4% | 0.0% | 0.0% | 0.0% | 0.0% |
| 18 to 44 years | Cholecystectomy - open                                                                  | 139 | 60.4% | 178.2 | 12.9% | 2.2% | 0.0% | 0.0% | 0.1% | 0.0% |



|                |                                                                                 |      |       |       |       |      |      |      |      |      |
|----------------|---------------------------------------------------------------------------------|------|-------|-------|-------|------|------|------|------|------|
| 18 to 44 years | Carpectomy                                                                      | 126  | 66.7% | 234.1 | 11.9% | 4.0% | 0.0% | 0.1% | 0.0% | 0.1% |
| 18 to 44 years | Sesamoidectomy, first toe                                                       | 158  | 52.5% | 135.8 | 7.6%  | 1.9% | 0.0% | 0.0% | 0.0% | 0.0% |
| 18 to 44 years | Incision and drainage, thigh or knee region                                     | 171  | 45.6% | 146.7 | 7.0%  | 1.2% | 0.0% | 0.0% | 0.0% | 0.0% |
| 18 to 44 years | Nerve transection                                                               | 123  | 61.8% | 100.5 | 4.9%  | 3.3% | 0.0% | 0.0% | 0.0% | 0.0% |
| 18 to 44 years | Revision and/or thrombectomy of arteriovenous fistula                           | 145  | 51.7% | 102.1 | 4.1%  | 2.8% | 0.0% | 0.0% | 0.0% | 0.0% |
| 18 to 44 years | Arthroplasty of shoulder                                                        | 112  | 67.0% | 344.2 | 33.9% | 4.5% | 0.0% | 0.1% | 0.2% | 0.1% |
| 18 to 44 years | Removal of implant; superficial (eg, buried wire, pin or rod)                   | 718  | 10.2% | 21.7  | 1.7%  | 0.4% | 0.0% | 0.0% | 0.0% | 0.0% |
| 18 to 44 years | Synovectomy, hand                                                               | 126  | 57.9% | 104.9 | 7.9%  | 1.6% | 0.0% | 0.0% | 0.0% | 0.0% |
| 18 to 44 years | Oophrectomy                                                                     | 118  | 61.9% | 152.3 | 11.9% | 1.7% | 0.0% | 0.0% | 0.0% | 0.0% |
| 18 to 44 years | Capsulectomy or capsulotomy, hand                                               | 105  | 69.5% | 183.7 | 18.1% | 4.8% | 0.0% | 0.0% | 0.1% | 0.1% |
| 18 to 44 years | Neurostimulator procedures                                                      | 139  | 51.8% | 134.7 | 12.9% | 9.4% | 0.0% | 0.0% | 0.1% | 0.1% |
| 18 to 44 years | Closure of enterostomy                                                          | 134  | 53.7% | 105.2 | 11.2% | 4.5% | 0.0% | 0.0% | 0.0% | 0.1% |
| 18 to 44 years | Tendon lengthening or shortening, lower extremity                               | 115  | 62.6% | 134.2 | 15.7% | 9.6% | 0.0% | 0.0% | 0.1% | 0.1% |
| 18 to 44 years | Adrenalectomy - laparoscopic                                                    | 101  | 71.3% | 138.4 | 5.9%  | 6.9% | 0.0% | 0.0% | 0.0% | 0.1% |
| 18 to 44 years | Tympanostomy                                                                    | 1007 | 6.9%  | 8.5   | 0.8%  | 0.5% | 0.0% | 0.0% | 0.0% | 0.1% |
| 18 to 44 years | Application of external fixation system                                         | 124  | 55.6% | 143.7 | 16.1% | 3.2% | 0.0% | 0.0% | 0.1% | 0.0% |
| 18 to 44 years | Tricuspid or Mitral valve repair/reconstruction - open                          | 115  | 59.1% | 139.6 | 13.9% | 5.2% | 0.0% | 0.0% | 0.0% | 0.1% |
| 18 to 44 years | Tenotomy, lower extremity                                                       | 231  | 29.0% | 74.3  | 4.3%  | 3.9% | 0.0% | 0.0% | 0.0% | 0.1% |
| 18 to 44 years | Tarsal tunnel release                                                           | 125  | 53.6% | 188.3 | 21.6% | 3.2% | 0.0% | 0.0% | 0.1% | 0.0% |
| 18 to 44 years | Reduction of torsion of testis                                                  | 101  | 65.3% | 99.1  | 2.0%  | 0.0% | 0.0% | 0.0% | 0.0% | 0.0% |
| 18 to 44 years | Excision of prepatellar bursa                                                   | 97   | 68.0% | 120.8 | 4.1%  | 1.0% | 0.0% | 0.0% | 0.0% | 0.0% |
| 18 to 44 years | CABG                                                                            | 107  | 60.7% | 176.4 | 25.2% | 5.6% | 0.0% | 0.0% | 0.1% | 0.1% |
| 18 to 44 years | Aortic reconstruction/repair                                                    | 103  | 63.1% | 252.5 | 20.4% | 3.9% | 0.0% | 0.0% | 0.1% | 0.0% |
| 18 to 44 years | Osteotomy of upper extremity                                                    | 93   | 68.8% | 115.1 | 10.8% | 4.3% | 0.0% | 0.0% | 0.0% | 0.0% |
| 18 to 44 years | Cranioplasty                                                                    | 132  | 47.0% | 165.8 | 7.6%  | 4.5% | 0.0% | 0.0% | 0.0% | 0.1% |
| 18 to 44 years | Elbow ligament reconstruction                                                   | 123  | 50.4% | 123.2 | 8.1%  | 2.4% | 0.0% | 0.0% | 0.0% | 0.0% |
| 18 to 44 years | Repair of enterocele                                                            | 73   | 84.9% | 275.5 | 24.7% | 4.1% | 0.0% | 0.0% | 0.1% | 0.0% |
| 18 to 44 years | Incision and drainage of abscess, cyst, or hematoma of tongue or floor of mouth | 116  | 52.6% | 77.5  | 2.6%  | 2.6% | 0.0% | 0.0% | 0.0% | 0.0% |
| 18 to 44 years | Aortic valve repair/replacement - open                                          | 112  | 54.5% | 96.4  | 13.4% | 3.6% | 0.0% | 0.0% | 0.0% | 0.0% |
| 18 to 44 years | Plastic operation of penis to correct chordee or angulation                     | 101  | 60.4% | 113.6 | 5.0%  | 6.9% | 0.0% | 0.0% | 0.0% | 0.1% |
| 18 to 44 years | Excision of olecranon bursa                                                     | 97   | 60.8% | 95.0  | 7.2%  | 5.2% | 0.0% | 0.0% | 0.0% | 0.1% |
| 18 to 44 years | Liver resection                                                                 | 86   | 67.4% | 207.0 | 16.3% | 5.8% | 0.0% | 0.0% | 0.0% | 0.1% |
| 18 to 44 years | Excision of urethral diverticulum                                               | 90   | 63.3% | 100.7 | 7.8%  | 1.1% | 0.0% | 0.0% | 0.0% | 0.0% |

|                |                                                                                                                                              |      |       |       |       |       |      |      |      |      |
|----------------|----------------------------------------------------------------------------------------------------------------------------------------------|------|-------|-------|-------|-------|------|------|------|------|
| 18 to 44 years | Palatopharyngoplasty                                                                                                                         | 97   | 57.7% | 309.5 | 23.7% | 1.0%  | 0.0% | 0.1% | 0.1% | 0.0% |
| 18 to 44 years | Removal of instrumentation in spine                                                                                                          | 83   | 67.5% | 271.4 | 19.3% | 12.0% | 0.0% | 0.0% | 0.1% | 0.1% |
| 18 to 44 years | Interventional cardiology; Comprehensive electrophysiologic evaluation including insertion and repositioning of multiple electrode catheters | 2006 | 2.7%  | 4.2   | 0.2%  | 0.5%  | 0.0% | 0.0% | 0.0% | 0.1% |
| 18 to 44 years | Periprosthetic capsulotomy, breast                                                                                                           | 107  | 51.4% | 151.7 | 3.7%  | 5.6%  | 0.0% | 0.0% | 0.0% | 0.1% |
| 18 to 44 years | Laparoscopic ovarian procedure                                                                                                               | 74   | 73.0% | 465.1 | 13.5% | 2.7%  | 0.0% | 0.1% | 0.0% | 0.0% |
| 18 to 44 years | Transplantation of kidneys                                                                                                                   | 122  | 43.4% | 86.2  | 7.4%  | 3.3%  | 0.0% | 0.0% | 0.0% | 0.0% |
| 18 to 44 years | Neuroendoscopy, intracranial                                                                                                                 | 116  | 45.7% | 145.3 | 4.3%  | 1.7%  | 0.0% | 0.0% | 0.0% | 0.0% |
| 18 to 44 years | Enterolysis - open                                                                                                                           | 100  | 53.0% | 119.9 | 13.0% | 6.0%  | 0.0% | 0.0% | 0.1% | 0.1% |
| 18 to 44 years | Removal of tissue expander(s) without insertion of prosthesis                                                                                | 89   | 59.6% | 145.9 | 5.6%  | 5.6%  | 0.0% | 0.0% | 0.0% | 0.1% |
| 18 to 44 years | Intestinal procedure, resection and anastomosis - laparoscopic                                                                               | 83   | 63.9% | 146.6 | 9.6%  | 6.0%  | 0.0% | 0.0% | 0.0% | 0.1% |
| 18 to 44 years | Removal of implantable defibrillator pulse generator with replacement of implantable defibrillator pulse generator                           | 152  | 34.2% | 57.8  | 2.0%  | 2.6%  | 0.0% | 0.0% | 0.0% | 0.0% |
| 18 to 44 years | Genioplasty                                                                                                                                  | 102  | 51.0% | 80.8  | 13.7% | 4.9%  | 0.0% | 0.0% | 0.1% | 0.1% |
| 18 to 44 years | Ethmoidectomy                                                                                                                                | 71   | 71.8% | 99.4  | 5.6%  | 0.0%  | 0.0% | 0.0% | 0.0% | 0.0% |
| 18 to 44 years | Perineoplasty, repair of perineum, nonobstetrical                                                                                            | 131  | 38.2% | 79.9  | 1.5%  | 1.5%  | 0.0% | 0.0% | 0.0% | 0.0% |
| 18 to 44 years | Incision and drainage, leg or ankle                                                                                                          | 135  | 36.3% | 172.7 | 9.6%  | 3.0%  | 0.0% | 0.0% | 0.1% | 0.0% |
| 18 to 44 years | Repair of nonunion or malunion, foot bones                                                                                                   | 77   | 63.6% | 225.6 | 20.8% | 2.6%  | 0.0% | 0.0% | 0.1% | 0.0% |
| 18 to 44 years | Nephrectomy - open                                                                                                                           | 71   | 69.0% | 138.8 | 16.9% | 2.8%  | 0.0% | 0.0% | 0.0% | 0.0% |
| 18 to 44 years | Removal of mammary implant                                                                                                                   | 107  | 43.9% | 61.3  | 4.7%  | 10.3% | 0.0% | 0.0% | 0.0% | 0.1% |
| 18 to 44 years | Laparoscopic fimbrioplasty                                                                                                                   | 89   | 52.8% | 90.6  | 3.4%  | 1.1%  | 0.0% | 0.0% | 0.0% | 0.0% |
| 18 to 44 years | Arthroplasty of elbow                                                                                                                        | 60   | 78.3% | 325.6 | 30.0% | 0.0%  | 0.0% | 0.0% | 0.1% | 0.0% |
| 18 to 44 years | Arthroplasty of temporomandibular joint                                                                                                      | 79   | 58.2% | 95.4  | 13.9% | 3.8%  | 0.0% | 0.0% | 0.0% | 0.0% |
| 18 to 44 years | Laparoscopic enterotomy closure                                                                                                              | 74   | 62.2% | 151.6 | 9.5%  | 5.4%  | 0.0% | 0.0% | 0.0% | 0.0% |
| 18 to 44 years | Keratoplasty                                                                                                                                 | 284  | 15.8% | 29.8  | 1.8%  | 0.4%  | 0.0% | 0.0% | 0.0% | 0.0% |
| 18 to 44 years | Gastrorrhaphy, suture of perforated duodenal or gastric ulcer, wound, or injury                                                              | 86   | 52.3% | 274.0 | 10.5% | 1.2%  | 0.0% | 0.0% | 0.0% | 0.0% |
| 18 to 44 years | Reconstructive repair of pectus excavatum or carinatum                                                                                       | 84   | 53.6% | 179.5 | 13.1% | 19.0% | 0.0% | 0.0% | 0.0% | 0.2% |
| 18 to 44 years | Repair of rectocele                                                                                                                          | 68   | 66.2% | 217.5 | 10.3% | 4.4%  | 0.0% | 0.0% | 0.0% | 0.0% |
| 18 to 44 years | Ureteroneocystostomy                                                                                                                         | 64   | 70.3% | 121.5 | 17.2% | 3.1%  | 0.0% | 0.0% | 0.0% | 0.0% |
| 18 to 44 years | Excision of lesion, cornea (keratectomy, lamellar, partial), except pterygium                                                                | 180  | 24.4% | 33.6  | 0.0%  | 1.1%  | 0.0% | 0.0% | 0.0% | 0.0% |
| 18 to 44 years | Mastoidectomy                                                                                                                                | 72   | 61.1% | 73.0  | 8.3%  | 1.4%  | 0.0% | 0.0% | 0.0% | 0.0% |
| 18 to 44 years | Hysterectomy, extended - open                                                                                                                | 70   | 62.9% | 155.9 | 15.7% | 4.3%  | 0.0% | 0.0% | 0.0% | 0.0% |
| 18 to 44 years | Intravitreal injection of a pharmacologic agent                                                                                              | 8036 | 0.5%  | 3.3   | 0.2%  | 0.0%  | 0.0% | 0.0% | 0.1% | 0.0% |

|                |                                                                                                                                                                                                                |      |       |       |       |       |      |      |      |      |
|----------------|----------------------------------------------------------------------------------------------------------------------------------------------------------------------------------------------------------------|------|-------|-------|-------|-------|------|------|------|------|
| 18 to 44 years | Excision or destruction of lingual tonsil, any method (separate procedure)                                                                                                                                     | 64   | 67.2% | 252.2 | 14.1% | 1.6%  | 0.0% | 0.0% | 0.0% | 0.0% |
| 18 to 44 years | Splenectomy - open                                                                                                                                                                                             | 66   | 63.6% | 248.6 | 22.7% | 4.5%  | 0.0% | 0.0% | 0.0% | 0.0% |
| 18 to 44 years | Glossectomy                                                                                                                                                                                                    | 63   | 66.7% | 148.2 | 11.1% | 7.9%  | 0.0% | 0.0% | 0.0% | 0.1% |
| 18 to 44 years | Resection or excision of neoplastic, vascular or infectious lesion, intracranial                                                                                                                               | 62   | 67.7% | 199.9 | 12.9% | 8.1%  | 0.0% | 0.0% | 0.0% | 0.1% |
| 18 to 44 years | Excision of lesion of mucosa and submucosa, vestibule of mouth                                                                                                                                                 | 115  | 35.7% | 35.1  | 3.5%  | 1.7%  | 0.0% | 0.0% | 0.0% | 0.0% |
| 18 to 44 years | Exploration of spinal fusion                                                                                                                                                                                   | 71   | 57.7% | 241.6 | 26.8% | 11.3% | 0.0% | 0.0% | 0.1% | 0.1% |
| 18 to 44 years | Exploration of artery without surgical repair                                                                                                                                                                  | 63   | 65.1% | 154.2 | 14.3% | 6.3%  | 0.0% | 0.0% | 0.0% | 0.0% |
| 18 to 44 years | Laparoscopic salpingostomy                                                                                                                                                                                     | 57   | 70.2% | 106.5 | 3.5%  | 3.5%  | 0.0% | 0.0% | 0.0% | 0.0% |
| 18 to 44 years | Infratemporal pre-auricular approach to middle cranial fossa                                                                                                                                                   | 55   | 72.7% | 204.8 | 18.2% | 10.9% | 0.0% | 0.0% | 0.0% | 0.1% |
| 18 to 44 years | Uvulectomy, excision of uvula                                                                                                                                                                                  | 64   | 60.9% | 117.4 | 14.1% | 1.6%  | 0.0% | 0.0% | 0.0% | 0.0% |
| 18 to 44 years | Laparoscopic hernia repair                                                                                                                                                                                     | 50   | 78.0% | 264.4 | 16.0% | 4.0%  | 0.0% | 0.0% | 0.0% | 0.0% |
| 18 to 44 years | Orbitotomy                                                                                                                                                                                                     | 114  | 33.3% | 51.9  | 0.9%  | 2.6%  | 0.0% | 0.0% | 0.0% | 0.0% |
| 18 to 44 years | Arthroplasty of ankle                                                                                                                                                                                          | 67   | 53.7% | 151.0 | 20.9% | 0.0%  | 0.0% | 0.0% | 0.1% | 0.0% |
| 18 to 44 years | Excision of local lesion of epididymis                                                                                                                                                                         | 61   | 59.0% | 68.2  | 1.6%  | 0.0%  | 0.0% | 0.0% | 0.0% | 0.0% |
| 18 to 44 years | Patellectomy or hemipatellectomy                                                                                                                                                                               | 60   | 60.0% | 119.5 | 13.3% | 3.3%  | 0.0% | 0.0% | 0.0% | 0.0% |
| 18 to 44 years | Resection (initial) of ovarian, tubal or primary peritoneal malignancy with bilateral salpingo-oophorectomy and omentectomy; with total abdominal hysterectomy, pelvic and limited para-aortic lymphadenectomy | 56   | 64.3% | 166.1 | 3.6%  | 3.6%  | 0.0% | 0.0% | 0.0% | 0.0% |
| 18 to 44 years | Splenectomy - laparoscopic                                                                                                                                                                                     | 41   | 87.8% | 233.2 | 12.2% | 9.8%  | 0.0% | 0.0% | 0.0% | 0.0% |
| 18 to 44 years | Percutaneous coronary procedures                                                                                                                                                                               | 1670 | 2.1%  | 7.3   | 0.7%  | 0.1%  | 0.0% | 0.0% | 0.0% | 0.0% |
| 18 to 44 years | Exclusion or fulguration of urethra                                                                                                                                                                            | 85   | 41.2% | 84.5  | 1.2%  | 0.0%  | 0.0% | 0.0% | 0.0% | 0.0% |
| 18 to 44 years | Dacryocystorhinostomy                                                                                                                                                                                          | 80   | 42.5% | 56.7  | 1.3%  | 0.0%  | 0.0% | 0.0% | 0.0% | 0.0% |
| 18 to 44 years | Proctoplasty                                                                                                                                                                                                   | 47   | 72.3% | 207.5 | 14.9% | 8.5%  | 0.0% | 0.0% | 0.0% | 0.0% |
| 18 to 44 years | Thoracoscopy, with pulmonary decortication                                                                                                                                                                     | 79   | 41.8% | 134.1 | 3.8%  | 2.5%  | 0.0% | 0.0% | 0.0% | 0.0% |
| 18 to 44 years | Penile prostheses                                                                                                                                                                                              | 52   | 63.5% | 66.6  | 5.8%  | 1.9%  | 0.0% | 0.0% | 0.0% | 0.0% |
| 18 to 44 years | Reconstruction of tendon pulley; finger                                                                                                                                                                        | 51   | 64.7% | 124.4 | 9.8%  | 0.0%  | 0.0% | 0.0% | 0.0% | 0.0% |
| 18 to 44 years | Excision or transposition of pterygium                                                                                                                                                                         | 289  | 11.1% | 22.7  | 0.3%  | 0.0%  | 0.0% | 0.0% | 0.0% | 0.0% |
| 18 to 44 years | Endovascular revascularization, lower extremity                                                                                                                                                                | 172  | 18.6% | 61.0  | 7.0%  | 2.3%  | 0.0% | 0.0% | 0.1% | 0.0% |
| 18 to 44 years | Removal or revision of sling for stress incontinence                                                                                                                                                           | 66   | 48.5% | 126.2 | 12.1% | 3.0%  | 0.0% | 0.0% | 0.0% | 0.0% |
| 18 to 44 years | Laparoscopic uterine procedure                                                                                                                                                                                 | 64   | 50.0% | 49.2  | 1.6%  | 0.0%  | 0.0% | 0.0% | 0.0% | 0.0% |
| 18 to 44 years | Insertion or replacement of peripheral or gastric neurostimulator pulse generator or receiver, direct or inductive coupling                                                                                    | 62   | 51.6% | 133.1 | 9.7%  | 4.8%  | 0.0% | 0.0% | 0.0% | 0.0% |
| 18 to 44 years | Arterial bypass                                                                                                                                                                                                | 58   | 55.2% | 122.4 | 15.5% | 3.4%  | 0.0% | 0.0% | 0.0% | 0.0% |

|                |                                                                                                        |      |       |       |       |       |      |      |      |      |
|----------------|--------------------------------------------------------------------------------------------------------|------|-------|-------|-------|-------|------|------|------|------|
| 18 to 44 years | Division of scalenus anticus                                                                           | 48   | 66.7% | 204.7 | 18.8% | 2.1%  | 0.0% | 0.0% | 0.0% | 0.0% |
| 18 to 44 years | Osteotomy of clavicle                                                                                  | 46   | 69.6% | 400.8 | 13.0% | 2.2%  | 0.0% | 0.0% | 0.0% | 0.0% |
| 18 to 44 years | Lateral retinacular release - open                                                                     | 42   | 76.2% | 332.9 | 16.7% | 2.4%  | 0.0% | 0.0% | 0.0% | 0.0% |
| 18 to 44 years | Thoracoscopy, excision of pericardial or mediastinal mass                                              | 51   | 60.8% | 169.6 | 5.9%  | 5.9%  | 0.0% | 0.0% | 0.0% | 0.0% |
| 18 to 44 years | Intestinal procedure, colon repair without or without ostomy for ulcer, diverticulum, wound, or injury | 44   | 70.5% | 187.8 | 6.8%  | 2.3%  | 0.0% | 0.0% | 0.0% | 0.0% |
| 18 to 44 years | Umbilectomy, omphalectomy, excision of umbilicus                                                       | 44   | 70.5% | 98.4  | 6.8%  | 0.0%  | 0.0% | 0.0% | 0.0% | 0.0% |
| 18 to 44 years | Excision of vaginal septum                                                                             | 91   | 33.0% | 27.2  | 1.1%  | 0.0%  | 0.0% | 0.0% | 0.0% | 0.0% |
| 18 to 44 years | Diaphragmatic repair                                                                                   | 52   | 57.7% | 206.0 | 17.3% | 0.0%  | 0.0% | 0.0% | 0.0% | 0.0% |
| 18 to 44 years | Muscle transfer, upper extremity                                                                       | 47   | 63.8% | 150.3 | 19.1% | 2.1%  | 0.0% | 0.0% | 0.1% | 0.0% |
| 18 to 44 years | Trachelorrhaphy, plastic repair of uterine cervix, vaginal approach                                    | 105  | 27.6% | 78.8  | 1.0%  | 1.0%  | 0.0% | 0.0% | 0.0% | 0.0% |
| 18 to 44 years | Open treatment of rib fracture                                                                         | 50   | 58.0% | 263.4 | 18.0% | 10.0% | 0.0% | 0.0% | 0.0% | 0.1% |
| 18 to 44 years | Removal of peritoneal foreign body from peritoneal cavity                                              | 46   | 63.0% | 175.7 | 10.9% | 6.5%  | 0.0% | 0.0% | 0.0% | 0.0% |
| 18 to 44 years | Thoracoscopy, with thymectomy                                                                          | 35   | 82.9% | 177.2 | 14.3% | 5.7%  | 0.0% | 0.0% | 0.0% | 0.0% |
| 18 to 44 years | Lung resection                                                                                         | 48   | 58.3% | 225.6 | 18.8% | 2.1%  | 0.0% | 0.0% | 0.0% | 0.0% |
| 18 to 44 years | Closure of vaginal fistula                                                                             | 45   | 62.2% | 99.4  | 11.1% | 8.9%  | 0.0% | 0.0% | 0.0% | 0.0% |
| 18 to 44 years | Reconstruction of hand interphalangeal joint                                                           | 39   | 71.8% | 194.4 | 7.7%  | 0.0%  | 0.0% | 0.0% | 0.0% | 0.0% |
| 18 to 44 years | Proctopexy - laparoscopic                                                                              | 36   | 77.8% | 118.4 | 11.1% | 8.3%  | 0.0% | 0.0% | 0.0% | 0.0% |
| 18 to 44 years | Repair of blood vessel                                                                                 | 80   | 33.8% | 100.5 | 10.0% | 1.3%  | 0.0% | 0.0% | 0.0% | 0.0% |
| 18 to 44 years | Autologous chondrocyte implantation, knee                                                              | 59   | 45.8% | 120.2 | 13.6% | 0.0%  | 0.0% | 0.0% | 0.0% | 0.0% |
| 18 to 44 years | Reinsertion of spinal fixation device                                                                  | 56   | 48.2% | 169.0 | 21.4% | 14.3% | 0.0% | 0.0% | 0.0% | 0.1% |
| 18 to 44 years | Intestinal procedure, ileostomy or jejunostomy                                                         | 49   | 55.1% | 191.4 | 18.4% | 4.1%  | 0.0% | 0.0% | 0.0% | 0.0% |
| 18 to 44 years | Prophylactic treatment (nailing, pinning, plating or wiring) of bone, lower extremity                  | 38   | 71.1% | 232.4 | 26.3% | 2.6%  | 0.0% | 0.0% | 0.0% | 0.0% |
| 18 to 44 years | Cystotomy or cystostomy                                                                                | 63   | 41.3% | 148.1 | 7.9%  | 3.2%  | 0.0% | 0.0% | 0.0% | 0.0% |
| 18 to 44 years | Plastic repair of salivary duct, sialodochoplasty                                                      | 63   | 41.3% | 41.4  | 1.6%  | 1.6%  | 0.0% | 0.0% | 0.0% | 0.0% |
| 18 to 44 years | Occlusion of fallopian tube(s) by device                                                               | 42   | 61.9% | 88.7  | 0.0%  | 0.0%  | 0.0% | 0.0% | 0.0% | 0.0% |
| 18 to 44 years | Incision of bone cortex, shoulder and upper extremity                                                  | 41   | 63.4% | 116.8 | 12.2% | 7.3%  | 0.0% | 0.0% | 0.0% | 0.0% |
| 18 to 44 years | Aneurysm/pseudoaneurysm repair                                                                         | 35   | 74.3% | 240.1 | 11.4% | 5.7%  | 0.0% | 0.0% | 0.0% | 0.0% |
| 18 to 44 years | Ligation or banding of angioaccess arteriovenous fistula                                               | 44   | 56.8% | 89.0  | 11.4% | 0.0%  | 0.0% | 0.0% | 0.0% | 0.0% |
| 18 to 44 years | Laryngoplasty                                                                                          | 37   | 67.6% | 143.9 | 2.7%  | 5.4%  | 0.0% | 0.0% | 0.0% | 0.0% |
| 18 to 44 years | Excision of lactiferous duct fistula                                                                   | 26   | 96.2% | 289.2 | 15.4% | 11.5% | 0.0% | 0.0% | 0.0% | 0.0% |
| 18 to 44 years | Closure of the lacrimal punctum                                                                        | 3904 | 0.6%  | 3.8   | 0.2%  | 0.1%  | 0.0% | 0.0% | 0.0% | 0.1% |
| 18 to 44 years | Epididymectomy                                                                                         | 42   | 57.1% | 132.8 | 7.1%  | 7.1%  | 0.0% | 0.0% | 0.0% | 0.0% |

|                |                                                                                                   |     |       |       |       |       |      |      |      |      |
|----------------|---------------------------------------------------------------------------------------------------|-----|-------|-------|-------|-------|------|------|------|------|
| 18 to 44 years | Intestinal procedure, intestinal hernia and volvulus derotation open laparotomy                   | 41  | 58.5% | 134.4 | 19.5% | 4.9%  | 0.0% | 0.0% | 0.1% | 0.0% |
| 18 to 44 years | Ureterolysis                                                                                      | 39  | 61.5% | 302.4 | 12.8% | 0.0%  | 0.0% | 0.0% | 0.0% | 0.0% |
| 18 to 44 years | Pancreatectomy                                                                                    | 38  | 63.2% | 193.3 | 21.1% | 2.6%  | 0.0% | 0.0% | 0.0% | 0.0% |
| 18 to 44 years | Acromioplasty or acromionectomy                                                                   | 36  | 66.7% | 253.8 | 22.2% | 2.8%  | 0.0% | 0.0% | 0.0% | 0.0% |
| 18 to 44 years | Excision of frenum, labial or buccal                                                              | 84  | 27.4% | 20.9  | 1.2%  | 0.0%  | 0.0% | 0.0% | 0.0% | 0.0% |
| 18 to 44 years | Sialolithotomy                                                                                    | 54  | 42.6% | 41.7  | 7.4%  | 0.0%  | 0.0% | 0.0% | 0.0% | 0.0% |
| 18 to 44 years | Intracranial arteriovenous malformation repair                                                    | 44  | 52.3% | 110.3 | 6.8%  | 0.0%  | 0.0% | 0.0% | 0.0% | 0.0% |
| 18 to 44 years | Excision of lesion of spermatic cord                                                              | 32  | 71.9% | 105.4 | 0.0%  | 0.0%  | 0.0% | 0.0% | 0.0% | 0.0% |
| 18 to 44 years | Implantation, replacement, revision, removal of gastric neurostimulator electrodes - laparoscopic | 26  | 88.5% | 205.2 | 11.5% | 15.4% | 0.0% | 0.0% | 0.0% | 0.0% |
| 18 to 44 years | Fixation of contralateral testis                                                                  | 39  | 56.4% | 75.9  | 0.0%  | 0.0%  | 0.0% | 0.0% | 0.0% | 0.0% |
| 18 to 44 years | Exploration for postoperative hemorrhage, thrombosis or infection                                 | 37  | 59.5% | 283.5 | 18.9% | 0.0%  | 0.0% | 0.0% | 0.0% | 0.0% |
| 18 to 44 years | Drainage of peritoneal abscess - open                                                             | 32  | 68.8% | 284.8 | 18.8% | 3.1%  | 0.0% | 0.0% | 0.0% | 0.0% |
| 18 to 44 years | Excision and repair of eyelid                                                                     | 116 | 18.1% | 19.4  | 1.7%  | 0.9%  | 0.0% | 0.0% | 0.0% | 0.0% |
| 18 to 44 years | Resection of metatarsal or toe                                                                    | 55  | 38.2% | 55.5  | 14.5% | 5.5%  | 0.0% | 0.0% | 0.1% | 0.0% |
| 18 to 44 years | Stereotactic biopsy, aspiration, or excision, including burr hole(s), for intracranial lesion     | 52  | 40.4% | 99.3  | 5.8%  | 1.9%  | 0.0% | 0.0% | 0.0% | 0.0% |
| 18 to 44 years | Stereotactic implantation of depth electrodes into the cerebrum for long-term seizure monitoring  | 45  | 46.7% | 81.4  | 2.2%  | 15.6% | 0.0% | 0.0% | 0.0% | 0.1% |
| 18 to 44 years | Laparoscopic fibroid ablation                                                                     | 38  | 55.3% | 138.1 | 2.6%  | 2.6%  | 0.0% | 0.0% | 0.0% | 0.0% |
| 18 to 44 years | Radical resection of capsule, soft tissue, and heterotopic bone, elbow, with contracture release  | 34  | 61.8% | 190.4 | 11.8% | 0.0%  | 0.0% | 0.0% | 0.0% | 0.0% |
| 18 to 44 years | Coccygectomy, primary                                                                             | 32  | 65.6% | 373.5 | 34.4% | 6.3%  | 0.0% | 0.0% | 0.0% | 0.0% |
| 18 to 44 years | Vasovasostomy, vasovasorrhaphy                                                                    | 29  | 72.4% | 78.7  | 6.9%  | 0.0%  | 0.0% | 0.0% | 0.0% | 0.0% |
| 18 to 44 years | Tubotubal anastomosis                                                                             | 28  | 75.0% | 150.7 | 10.7% | 3.6%  | 0.0% | 0.0% | 0.0% | 0.0% |
| 18 to 44 years | Nipple exploration or reconstruction                                                              | 98  | 20.4% | 40.9  | 0.0%  | 1.0%  | 0.0% | 0.0% | 0.0% | 0.0% |
| 18 to 44 years | Muscle repair, hand                                                                               | 31  | 64.5% | 214.5 | 6.5%  | 3.2%  | 0.0% | 0.0% | 0.0% | 0.0% |
| 18 to 44 years | Scrotoplasty                                                                                      | 31  | 64.5% | 85.8  | 6.5%  | 6.5%  | 0.0% | 0.0% | 0.0% | 0.0% |
| 18 to 44 years | Bypass graft                                                                                      | 28  | 71.4% | 286.8 | 32.1% | 3.6%  | 0.0% | 0.0% | 0.0% | 0.0% |
| 18 to 44 years | Excision of lip                                                                                   | 73  | 26.0% | 29.2  | 0.0%  | 0.0%  | 0.0% | 0.0% | 0.0% | 0.0% |
| 18 to 44 years | Tenolysis, lower extremity                                                                        | 39  | 48.7% | 182.5 | 2.6%  | 0.0%  | 0.0% | 0.0% | 0.0% | 0.0% |
| 18 to 44 years | Excision of distal ulna                                                                           | 34  | 55.9% | 140.8 | 8.8%  | 14.7% | 0.0% | 0.0% | 0.0% | 0.1% |
| 18 to 44 years | Laparoscopic sling operation for stress incontinence (eg, fascia or synthetic)                    | 20  | 95.0% | 132.2 | 20.0% | 5.0%  | 0.0% | 0.0% | 0.0% | 0.0% |
| 18 to 44 years | Gender affirming procedure, male to female                                                        | 47  | 38.3% | 372.4 | 8.5%  | 0.0%  | 0.0% | 0.0% | 0.0% | 0.0% |
| 18 to 44 years | Incision and drainage, pelvis or hip joint area                                                   | 39  | 46.2% | 91.2  | 12.8% | 2.6%  | 0.0% | 0.0% | 0.0% | 0.0% |
| 18 to 44 years | Embolectomy or thrombectomy                                                                       | 38  | 47.4% | 70.1  | 15.8% | 0.0%  | 0.0% | 0.0% | 0.0% | 0.0% |

|                |                                                                                                                    |     |       |       |       |       |      |      |      |      |
|----------------|--------------------------------------------------------------------------------------------------------------------|-----|-------|-------|-------|-------|------|------|------|------|
| 18 to 44 years | Colostomy - open                                                                                                   | 35  | 51.4% | 179.9 | 17.1% | 0.0%  | 0.0% | 0.0% | 0.0% | 0.0% |
| 18 to 44 years | Nasal/sinus endoscopy                                                                                              | 35  | 51.4% | 341.7 | 11.4% | 0.0%  | 0.0% | 0.0% | 0.0% | 0.0% |
| 18 to 44 years | Excision of lesion of meniscus or capsule, knee                                                                    | 32  | 56.3% | 200.3 | 3.1%  | 0.0%  | 0.0% | 0.0% | 0.0% | 0.0% |
| 18 to 44 years | Enucleation of eye                                                                                                 | 31  | 58.1% | 142.1 | 6.5%  | 0.0%  | 0.0% | 0.0% | 0.0% | 0.0% |
| 18 to 44 years | Excision of cyst or adenoma of thyroid, or transection of isthmus                                                  | 31  | 58.1% | 89.5  | 0.0%  | 0.0%  | 0.0% | 0.0% | 0.0% | 0.0% |
| 18 to 44 years | Extensor tendon centralization, hand                                                                               | 28  | 64.3% | 113.6 | 7.1%  | 0.0%  | 0.0% | 0.0% | 0.0% | 0.0% |
| 18 to 44 years | Evisceration of ocular contents                                                                                    | 26  | 69.2% | 411.9 | 11.5% | 0.0%  | 0.0% | 0.0% | 0.0% | 0.0% |
| 18 to 44 years | Laparoscopic esophagus procedure sphincter augmentation                                                            | 26  | 69.2% | 110.7 | 0.0%  | 11.5% | 0.0% | 0.0% | 0.0% | 0.0% |
| 18 to 44 years | Laparoscopic bladder procedure                                                                                     | 25  | 72.0% | 104.7 | 0.0%  | 8.0%  | 0.0% | 0.0% | 0.0% | 0.0% |
| 18 to 44 years | Capsulotomy, wrist                                                                                                 | 24  | 75.0% | 153.4 | 0.0%  | 4.2%  | 0.0% | 0.0% | 0.0% | 0.0% |
| 18 to 44 years | Laparoscopic rectal procedure                                                                                      | 37  | 45.9% | 219.8 | 2.7%  | 2.7%  | 0.0% | 0.0% | 0.0% | 0.0% |
| 18 to 44 years | Decompression fasciotomy of upper extremity                                                                        | 31  | 54.8% | 205.2 | 16.1% | 3.2%  | 0.0% | 0.0% | 0.0% | 0.0% |
| 18 to 44 years | Tenodesis, hand                                                                                                    | 24  | 70.8% | 222.7 | 12.5% | 4.2%  | 0.0% | 0.0% | 0.0% | 0.0% |
| 18 to 44 years | Vitrectomy                                                                                                         | 341 | 4.7%  | 25.0  | 0.3%  | 0.6%  | 0.0% | 0.0% | 0.0% | 0.0% |
| 18 to 44 years | Conjunctival flap                                                                                                  | 74  | 21.6% | 61.7  | 0.0%  | 0.0%  | 0.0% | 0.0% | 0.0% | 0.0% |
| 18 to 44 years | Osteotomy of facial bones                                                                                          | 35  | 45.7% | 300.7 | 2.9%  | 0.0%  | 0.0% | 0.0% | 0.0% | 0.0% |
| 18 to 44 years | Colostomy - laparoscopic                                                                                           | 33  | 48.5% | 88.0  | 12.1% | 6.1%  | 0.0% | 0.0% | 0.0% | 0.0% |
| 18 to 44 years | Palatoplasty                                                                                                       | 32  | 50.0% | 199.0 | 9.4%  | 0.0%  | 0.0% | 0.0% | 0.0% | 0.0% |
| 18 to 44 years | Intracranial aneurysm repair - open                                                                                | 30  | 53.3% | 174.9 | 16.7% | 6.7%  | 0.0% | 0.0% | 0.0% | 0.0% |
| 18 to 44 years | Hypophysectomy or excision of pituitary tumor                                                                      | 29  | 55.2% | 215.6 | 10.3% | 6.9%  | 0.0% | 0.0% | 0.0% | 0.0% |
| 18 to 44 years | Liver transplantation                                                                                              | 29  | 55.2% | 114.5 | 13.8% | 0.0%  | 0.0% | 0.0% | 0.0% | 0.0% |
| 18 to 44 years | Excision of chest wall tumor, including ribs                                                                       | 27  | 59.3% | 154.9 | 7.4%  | 3.7%  | 0.0% | 0.0% | 0.0% | 0.0% |
| 18 to 44 years | Repair of tunica vaginalis hydrocele                                                                               | 27  | 59.3% | 57.4  | 3.7%  | 0.0%  | 0.0% | 0.0% | 0.0% | 0.0% |
| 18 to 44 years | Urethrolisis, transvaginal, secondary - open, including cystourethroscopy (eg, postsurgical obstruction, scarring) | 25  | 64.0% | 114.0 | 4.0%  | 4.0%  | 0.0% | 0.0% | 0.0% | 0.0% |
| 18 to 44 years | Paravaginal defect repair - laparoscopic                                                                           | 24  | 66.7% | 112.6 | 8.3%  | 4.2%  | 0.0% | 0.0% | 0.0% | 0.0% |
| 18 to 44 years | Excision of urachal cyst or sinus                                                                                  | 21  | 76.2% | 221.3 | 9.5%  | 4.8%  | 0.0% | 0.0% | 0.0% | 0.0% |
| 18 to 44 years | Correction of lid retraction                                                                                       | 42  | 35.7% | 100.1 | 4.8%  | 0.0%  | 0.0% | 0.0% | 0.0% | 0.0% |
| 18 to 44 years | Frenoplasty                                                                                                        | 41  | 36.6% | 43.6  | 2.4%  | 2.4%  | 0.0% | 0.0% | 0.0% | 0.0% |
| 18 to 44 years | Thoracotomy, with pulmonary decortication                                                                          | 40  | 37.5% | 123.2 | 12.5% | 7.5%  | 0.0% | 0.0% | 0.0% | 0.0% |
| 18 to 44 years | Mastopexy                                                                                                          | 38  | 39.5% | 49.0  | 5.3%  | 5.3%  | 0.0% | 0.0% | 0.0% | 0.0% |
| 18 to 44 years | Burr hole(s) or trephine                                                                                           | 37  | 40.5% | 121.1 | 10.8% | 5.4%  | 0.0% | 0.0% | 0.0% | 0.0% |
| 18 to 44 years | Reconstruction of toe                                                                                              | 29  | 51.7% | 94.9  | 6.9%  | 0.0%  | 0.0% | 0.0% | 0.0% | 0.0% |

|                |                                                                   |      |       |       |       |       |      |      |      |      |
|----------------|-------------------------------------------------------------------|------|-------|-------|-------|-------|------|------|------|------|
| 18 to 44 years | Hysterorrhaphy of ruptured uterus                                 | 28   | 53.6% | 123.2 | 7.1%  | 0.0%  | 0.0% | 0.0% | 0.0% | 0.0% |
| 18 to 44 years | Maxillectomy                                                      | 27   | 55.6% | 78.3  | 11.1% | 7.4%  | 0.0% | 0.0% | 0.0% | 0.0% |
| 18 to 44 years | Medianstintomy                                                    | 25   | 60.0% | 121.2 | 16.0% | 8.0%  | 0.0% | 0.0% | 0.0% | 0.0% |
| 18 to 44 years | Closure of intestinal fistula                                     | 24   | 62.5% | 140.1 | 8.3%  | 4.2%  | 0.0% | 0.0% | 0.0% | 0.0% |
| 18 to 44 years | Ablation of intra-abdominal tumor or benign lesion - laparoscopic | 20   | 75.0% | 106.0 | 20.0% | 10.0% | 0.0% | 0.0% | 0.0% | 0.0% |
| 18 to 44 years | Biliary reconstruction - open                                     | 19   | 78.9% | 366.2 | 5.3%  | 5.3%  | 0.0% | 0.0% | 0.0% | 0.0% |
| 18 to 44 years | Ureterotomy                                                       | 35   | 40.0% | 320.7 | 5.7%  | 2.9%  | 0.0% | 0.0% | 0.0% | 0.0% |
| 18 to 44 years | Pulmonary valve repair/replacement - open                         | 32   | 43.8% | 59.1  | 6.3%  | 3.1%  | 0.0% | 0.0% | 0.0% | 0.0% |
| 18 to 44 years | Resection of scrotum                                              | 28   | 50.0% | 88.2  | 0.0%  | 0.0%  | 0.0% | 0.0% | 0.0% | 0.0% |
| 18 to 44 years | Intestinal procedure, repair                                      | 26   | 53.8% | 195.1 | 11.5% | 0.0%  | 0.0% | 0.0% | 0.0% | 0.0% |
| 18 to 44 years | Thymectomy, with or without lymphadenectomy                       | 26   | 53.8% | 178.4 | 3.8%  | 3.8%  | 0.0% | 0.0% | 0.0% | 0.0% |
| 18 to 44 years | Resection of mediastinal tumor                                    | 24   | 58.3% | 122.7 | 4.2%  | 0.0%  | 0.0% | 0.0% | 0.0% | 0.0% |
| 18 to 44 years | Resection of bone tumor                                           | 23   | 60.9% | 126.5 | 0.0%  | 0.0%  | 0.0% | 0.0% | 0.0% | 0.0% |
| 18 to 44 years | Excision of trochanteric bursa or calcification                   | 22   | 63.6% | 158.5 | 27.3% | 18.2% | 0.0% | 0.0% | 0.0% | 0.0% |
| 18 to 44 years | Excision of synovial cyst of popliteal space                      | 21   | 66.7% | 87.7  | 0.0%  | 0.0%  | 0.0% | 0.0% | 0.0% | 0.0% |
| 18 to 44 years | Trachelectomy, with or without lymph node dissection              | 21   | 66.7% | 119.0 | 0.0%  | 4.8%  | 0.0% | 0.0% | 0.0% | 0.0% |
| 18 to 44 years | Anoplasty                                                         | 20   | 70.0% | 254.6 | 30.0% | 10.0% | 0.0% | 0.0% | 0.0% | 0.0% |
| 18 to 44 years | Acetabuloplasty                                                   | 17   | 82.4% | 136.3 | 35.3% | 52.9% | 0.0% | 0.0% | 0.0% | 0.1% |
| 18 to 44 years | Transurethral resection of prostate                               | 30   | 43.3% | 36.4  | 13.3% | 6.7%  | 0.0% | 0.0% | 0.0% | 0.0% |
| 18 to 44 years | Non-surgical repair of anal or anorectal fistula                  | 27   | 48.1% | 183.1 | 7.4%  | 0.0%  | 0.0% | 0.0% | 0.0% | 0.0% |
| 18 to 44 years | Thoracoscopy, with sympathectomy                                  | 26   | 50.0% | 115.9 | 7.7%  | 0.0%  | 0.0% | 0.0% | 0.0% | 0.0% |
| 18 to 44 years | Secondary repair of dura for cerebrospinal fluid leak             | 23   | 56.5% | 111.3 | 8.7%  | 0.0%  | 0.0% | 0.0% | 0.0% | 0.0% |
| 18 to 44 years | Elevation of depressed skull fracture                             | 22   | 59.1% | 217.8 | 4.5%  | 0.0%  | 0.0% | 0.0% | 0.0% | 0.0% |
| 18 to 44 years | Plastic operation of penis for injury                             | 20   | 65.0% | 106.5 | 15.0% | 5.0%  | 0.0% | 0.0% | 0.0% | 0.0% |
| 18 to 44 years | Prostatectomy - laparoscopic                                      | 18   | 72.2% | 109.8 | 0.0%  | 0.0%  | 0.0% | 0.0% | 0.0% | 0.0% |
| 18 to 44 years | Closure of rectovesical fistula                                   | 17   | 76.5% | 169.1 | 29.4% | 5.9%  | 0.0% | 0.0% | 0.0% | 0.0% |
| 18 to 44 years | Cataract removal                                                  | 1287 | 0.9%  | 6.0   | 0.5%  | 0.1%  | 0.0% | 0.0% | 0.0% | 0.0% |
| 18 to 44 years | Creation of pericardial window                                    | 37   | 32.4% | 121.3 | 5.4%  | 5.4%  | 0.0% | 0.0% | 0.0% | 0.0% |
| 18 to 44 years | Urethromeatoplasty                                                | 30   | 40.0% | 66.8  | 0.0%  | 0.0%  | 0.0% | 0.0% | 0.0% | 0.0% |
| 18 to 44 years | Reconstruction of external auditory canal                         | 28   | 42.9% | 38.2  | 3.6%  | 7.1%  | 0.0% | 0.0% | 0.0% | 0.0% |
| 18 to 44 years | Open treatment of spinal fracture                                 | 27   | 44.4% | 316.9 | 14.8% | 3.7%  | 0.0% | 0.0% | 0.0% | 0.0% |
| 18 to 44 years | Excision of extraparenchymal lesion of testis                     | 24   | 50.0% | 42.4  | 8.3%  | 0.0%  | 0.0% | 0.0% | 0.0% | 0.0% |
| 18 to 44 years | Sinusotomy, with or without reconstruction                        | 23   | 52.2% | 57.3  | 4.3%  | 4.3%  | 0.0% | 0.0% | 0.0% | 0.0% |

|                |                                                                                                     |    |       |       |       |       |      |      |      |      |
|----------------|-----------------------------------------------------------------------------------------------------|----|-------|-------|-------|-------|------|------|------|------|
| 18 to 44 years | Division of plantar fascia and muscle                                                               | 20 | 60.0% | 141.4 | 15.0% | 5.0%  | 0.0% | 0.0% | 0.0% | 0.0% |
| 18 to 44 years | Ventriculomyotomy (-myectomy) for idiopathic hypertrophic subaortic stenosis                        | 19 | 63.2% | 94.7  | 21.1% | 5.3%  | 0.0% | 0.0% | 0.0% | 0.0% |
| 18 to 44 years | Proctopexy - open                                                                                   | 18 | 66.7% | 534.2 | 5.6%  | 5.6%  | 0.0% | 0.0% | 0.0% | 0.0% |
| 18 to 44 years | Excision of tendon of hand or finger                                                                | 17 | 70.6% | 137.1 | 5.9%  | 0.0%  | 0.0% | 0.0% | 0.0% | 0.0% |
| 18 to 44 years | Fetal procedure                                                                                     | 65 | 16.9% | 10.0  | 1.5%  | 1.5%  | 0.0% | 0.0% | 0.0% | 0.0% |
| 18 to 44 years | Repair of entropion                                                                                 | 51 | 21.6% | 43.8  | 3.9%  | 3.9%  | 0.0% | 0.0% | 0.0% | 0.0% |
| 18 to 44 years | Laparoscopic gastrostomy, without construction of gastric tube                                      | 43 | 25.6% | 36.2  | 11.6% | 4.7%  | 0.0% | 0.0% | 0.0% | 0.0% |
| 18 to 44 years | Incision of bone cortex, pelvis and lower extremity                                                 | 34 | 32.4% | 45.7  | 8.8%  | 0.0%  | 0.0% | 0.0% | 0.0% | 0.0% |
| 18 to 44 years | Repair of ectropion                                                                                 | 30 | 36.7% | 88.5  | 3.3%  | 0.0%  | 0.0% | 0.0% | 0.0% | 0.0% |
| 18 to 44 years | Revision of gastroduodenal or gastrojejunal anastomosis                                             | 21 | 52.4% | 308.2 | 23.8% | 9.5%  | 0.0% | 0.0% | 0.0% | 0.0% |
| 18 to 44 years | Corpora cavernosa shunts fore priapism                                                              | 20 | 55.0% | 123.4 | 15.0% | 0.0%  | 0.0% | 0.0% | 0.0% | 0.0% |
| 18 to 44 years | Repair of atrial and/or ventricular septal defects                                                  | 20 | 55.0% | 499.3 | 15.0% | 0.0%  | 0.0% | 0.0% | 0.0% | 0.0% |
| 18 to 44 years | Cystectomy                                                                                          | 19 | 57.9% | 84.7  | 15.8% | 0.0%  | 0.0% | 0.0% | 0.0% | 0.0% |
| 18 to 44 years | Hypospadias repair                                                                                  | 19 | 57.9% | 106.8 | 10.5% | 15.8% | 0.0% | 0.0% | 0.0% | 0.0% |
| 18 to 44 years | Exploration, retroperitoneal area with or without biopsy(s)                                         | 18 | 61.1% | 125.8 | 16.7% | 11.1% | 0.0% | 0.0% | 0.0% | 0.0% |
| 18 to 44 years | Open treatment of slipped femoral epiphysis                                                         | 17 | 64.7% | 278.1 | 17.6% | 52.9% | 0.0% | 0.0% | 0.0% | 0.1% |
| 18 to 44 years | Creation of shunt, lumbar, subarachnoid-peritoneal, -pleural, or other; with or without laminectomy | 16 | 68.8% | 121.7 | 18.8% | 0.0%  | 0.0% | 0.0% | 0.0% | 0.0% |
| 18 to 44 years | Tissue expander placement, excluding breast                                                         | 16 | 68.8% | 78.3  | 25.0% | 0.0%  | 0.0% | 0.0% | 0.0% | 0.0% |
| 18 to 44 years | Radial styloidectomy                                                                                | 15 | 73.3% | 277.3 | 0.0%  | 0.0%  | 0.0% | 0.0% | 0.0% | 0.0% |
| 18 to 44 years | Release of intrinsic muscles of hand                                                                | 15 | 73.3% | 459.7 | 20.0% | 6.7%  | 0.0% | 0.0% | 0.0% | 0.0% |
| 18 to 44 years | Excision of stomach ulcer or tumor                                                                  | 14 | 78.6% | 207.3 | 28.6% | 7.1%  | 0.0% | 0.0% | 0.0% | 0.0% |
| 18 to 44 years | Incision and drainage of abscess in posterior spine                                                 | 23 | 43.5% | 184.9 | 8.7%  | 4.3%  | 0.0% | 0.0% | 0.0% | 0.0% |
| 18 to 44 years | Suture of mesentery                                                                                 | 21 | 47.6% | 45.3  | 4.8%  | 4.8%  | 0.0% | 0.0% | 0.0% | 0.0% |
| 18 to 44 years | Alveolectomy                                                                                        | 20 | 50.0% | 95.1  | 15.0% | 5.0%  | 0.0% | 0.0% | 0.0% | 0.0% |
| 18 to 44 years | Revision (including removal) of prosthetic vaginal graft - open                                     | 19 | 52.6% | 51.1  | 5.3%  | 0.0%  | 0.0% | 0.0% | 0.0% | 0.0% |
| 18 to 44 years | Fascia lata graft                                                                                   | 17 | 58.8% | 98.4  | 5.9%  | 0.0%  | 0.0% | 0.0% | 0.0% | 0.0% |
| 18 to 44 years | Spine bony resection                                                                                | 16 | 62.5% | 222.7 | 25.0% | 6.3%  | 0.0% | 0.0% | 0.0% | 0.0% |
| 18 to 44 years | Ablation of intraabdominal tumor or benign lesion ♦ open                                            | 15 | 66.7% | 143.3 | 0.0%  | 0.0%  | 0.0% | 0.0% | 0.0% | 0.0% |
| 18 to 44 years | Repair of dural/cerebrospinal fluid leak or pseudomeningocele, with laminectomy                     | 14 | 71.4% | 199.3 | 14.3% | 0.0%  | 0.0% | 0.0% | 0.0% | 0.0% |
| 18 to 44 years | Ciliary body destruction                                                                            | 86 | 10.5% | 8.2   | 1.2%  | 0.0%  | 0.0% | 0.0% | 0.0% | 0.0% |
| 18 to 44 years | Plastic repair of introitus                                                                         | 27 | 33.3% | 118.8 | 0.0%  | 0.0%  | 0.0% | 0.0% | 0.0% | 0.0% |
| 18 to 44 years | Excision of exostosis(es), external auditory canal                                                  | 23 | 39.1% | 44.0  | 0.0%  | 0.0%  | 0.0% | 0.0% | 0.0% | 0.0% |



|                |                                                                                                                       |      |       |       |       |       |      |      |      |      |
|----------------|-----------------------------------------------------------------------------------------------------------------------|------|-------|-------|-------|-------|------|------|------|------|
| 18 to 44 years | Lysis of adhesions (salpingolysis, ovariolysis)                                                                       | 18   | 50.0% | 85.4  | 5.6%  | 0.0%  | 0.0% | 0.0% | 0.0% | 0.0% |
| 18 to 44 years | Excision of Meckel's diverticulum or omphalomesenteric duct                                                           | 15   | 60.0% | 259.3 | 6.7%  | 0.0%  | 0.0% | 0.0% | 0.0% | 0.0% |
| 18 to 44 years | Repair of anomalous coronary artery from pulmonary artery origin                                                      | 14   | 64.3% | 157.7 | 14.3% | 14.3% | 0.0% | 0.0% | 0.0% | 0.0% |
| 18 to 44 years | Uterine suspension                                                                                                    | 14   | 64.3% | 335.5 | 0.0%  | 0.0%  | 0.0% | 0.0% | 0.0% | 0.0% |
| 18 to 44 years | Excision of presacral or sacrococcygeal tumor                                                                         | 13   | 69.2% | 129.2 | 15.4% | 0.0%  | 0.0% | 0.0% | 0.0% | 0.0% |
| 18 to 44 years | Coronoidectomy                                                                                                        | 11   | 81.8% | 160.1 | 9.1%  | 0.0%  | 0.0% | 0.0% | 0.0% | 0.0% |
| 18 to 44 years | Abdominal wall repair, dehiscence                                                                                     | 10   | 90.0% | 193.3 | 30.0% | 0.0%  | 0.0% | 0.0% | 0.0% | 0.0% |
| 18 to 44 years | Embryo transfer, intrauterine                                                                                         | 7337 | 0.1%  | 0.4   | 0.0%  | 0.0%  | 0.0% | 0.0% | 0.0% | 0.0% |
| 18 to 44 years | Removal of implanted material, eye                                                                                    | 107  | 7.5%  | 7.1   | 1.9%  | 0.0%  | 0.0% | 0.0% | 0.0% | 0.0% |
| 18 to 44 years | Repair of eye laceration                                                                                              | 57   | 14.0% | 31.0  | 3.5%  | 0.0%  | 0.0% | 0.0% | 0.0% | 0.0% |
| 18 to 44 years | Capsulectomy or capsulotomy, hip                                                                                      | 25   | 32.0% | 60.8  | 4.0%  | 4.0%  | 0.0% | 0.0% | 0.0% | 0.0% |
| 18 to 44 years | Repair of brow ptosis                                                                                                 | 24   | 33.3% | 125.9 | 0.0%  | 8.3%  | 0.0% | 0.0% | 0.0% | 0.0% |
| 18 to 44 years | Temporary closure of eyelids by suture                                                                                | 24   | 33.3% | 99.0  | 12.5% | 0.0%  | 0.0% | 0.0% | 0.0% | 0.0% |
| 18 to 44 years | Vaginectomy                                                                                                           | 21   | 38.1% | 40.7  | 0.0%  | 0.0%  | 0.0% | 0.0% | 0.0% | 0.0% |
| 18 to 44 years | Osteotomy of pelvis                                                                                                   | 18   | 44.4% | 73.1  | 22.2% | 5.6%  | 0.0% | 0.0% | 0.0% | 0.0% |
| 18 to 44 years | Intestinal procedure, lysis of adhesions                                                                              | 17   | 47.1% | 310.3 | 5.9%  | 0.0%  | 0.0% | 0.0% | 0.0% | 0.0% |
| 18 to 44 years | Excision of tendon, hand                                                                                              | 16   | 50.0% | 32.7  | 0.0%  | 0.0%  | 0.0% | 0.0% | 0.0% | 0.0% |
| 18 to 44 years | Optic nerve decompression                                                                                             | 14   | 57.1% | 43.2  | 0.0%  | 0.0%  | 0.0% | 0.0% | 0.0% | 0.0% |
| 18 to 44 years | Capsulotomy, posterior capsular release, knee                                                                         | 13   | 61.5% | 125.0 | 23.1% | 7.7%  | 0.0% | 0.0% | 0.0% | 0.0% |
| 18 to 44 years | Radical resection of tumor, bone                                                                                      | 13   | 61.5% | 187.3 | 23.1% | 0.0%  | 0.0% | 0.0% | 0.0% | 0.0% |
| 18 to 44 years | Transtemporal, transcochlear, transcondylar, transpetrosal approach to posterior cranial fossa                        | 13   | 61.5% | 124.6 | 0.0%  | 15.4% | 0.0% | 0.0% | 0.0% | 0.0% |
| 18 to 44 years | Capsulodesis, metacarpophalangeal joint                                                                               | 12   | 66.7% | 61.7  | 8.3%  | 0.0%  | 0.0% | 0.0% | 0.0% | 0.0% |
| 18 to 44 years | Endolymphatic sac operation                                                                                           | 12   | 66.7% | 51.7  | 0.0%  | 16.7% | 0.0% | 0.0% | 0.0% | 0.0% |
| 18 to 44 years | Revision of gastric restrictive procedure for morbid obesity, other than adjustable gastric restrictive device - open | 12   | 66.7% | 127.1 | 16.7% | 8.3%  | 0.0% | 0.0% | 0.0% | 0.0% |
| 18 to 44 years | Excision of rectal procidentia                                                                                        | 11   | 72.7% | 191.3 | 0.0%  | 18.2% | 0.0% | 0.0% | 0.0% | 0.0% |
| 18 to 44 years | Laparoscopic spleen procedure                                                                                         | 10   | 80.0% | 74.3  | 0.0%  | 10.0% | 0.0% | 0.0% | 0.0% | 0.0% |
| 18 to 44 years | Paravaginal defect repair - open                                                                                      | 10   | 80.0% | 132.3 | 20.0% | 20.0% | 0.0% | 0.0% | 0.0% | 0.0% |
| 18 to 44 years | Reconstruction of shoulder                                                                                            | 10   | 80.0% | 210.5 | 30.0% | 0.0%  | 0.0% | 0.0% | 0.0% | 0.0% |
| 18 to 44 years | Tracheostomy                                                                                                          | 63   | 11.1% | 61.7  | 6.3%  | 3.2%  | 0.0% | 0.0% | 0.0% | 0.0% |
| 18 to 44 years | TIPS                                                                                                                  | 37   | 18.9% | 44.5  | 2.7%  | 2.7%  | 0.0% | 0.0% | 0.0% | 0.0% |
| 18 to 44 years | Removal of implant from finger or hand                                                                                | 33   | 21.2% | 30.5  | 3.0%  | 0.0%  | 0.0% | 0.0% | 0.0% | 0.0% |
| 18 to 44 years | Plastic repair of canaliculi                                                                                          | 32   | 21.9% | 59.9  | 0.0%  | 0.0%  | 0.0% | 0.0% | 0.0% | 0.0% |

|                |                                                                              |    |        |       |       |       |      |      |      |      |
|----------------|------------------------------------------------------------------------------|----|--------|-------|-------|-------|------|------|------|------|
| 18 to 44 years | Ventriculocisternostomy, third ventricle                                     | 18 | 38.9%  | 92.1  | 0.0%  | 0.0%  | 0.0% | 0.0% | 0.0% | 0.0% |
| 18 to 44 years | Cystolithotomy, cystotomy with removal of calculus                           | 16 | 43.8%  | 48.8  | 6.3%  | 0.0%  | 0.0% | 0.0% | 0.0% | 0.0% |
| 18 to 44 years | Thromboendarterectomy                                                        | 15 | 46.7%  | 53.0  | 6.7%  | 6.7%  | 0.0% | 0.0% | 0.0% | 0.0% |
| 18 to 44 years | Excision of infected graft                                                   | 14 | 50.0%  | 58.0  | 7.1%  | 0.0%  | 0.0% | 0.0% | 0.0% | 0.0% |
| 18 to 44 years | Incision and drainage of abscess; retropharyngeal or parapharyngeal          | 14 | 50.0%  | 149.6 | 7.1%  | 7.1%  | 0.0% | 0.0% | 0.0% | 0.0% |
| 18 to 44 years | Removal of foreign body, shoulder                                            | 14 | 50.0%  | 88.6  | 7.1%  | 0.0%  | 0.0% | 0.0% | 0.0% | 0.0% |
| 18 to 44 years | Tendon lengthening or shortening, upper extremity                            | 14 | 50.0%  | 221.3 | 7.1%  | 0.0%  | 0.0% | 0.0% | 0.0% | 0.0% |
| 18 to 44 years | Laparoscopic renal procedure                                                 | 11 | 63.6%  | 229.1 | 9.1%  | 0.0%  | 0.0% | 0.0% | 0.0% | 0.0% |
| 18 to 44 years | Removal of ankle implant                                                     | 11 | 63.6%  | 94.5  | 0.0%  | 0.0%  | 0.0% | 0.0% | 0.0% | 0.0% |
| 18 to 44 years | Division of stricture of rectum                                              | 10 | 70.0%  | 365.3 | 0.0%  | 0.0%  | 0.0% | 0.0% | 0.0% | 0.0% |
| 18 to 44 years | Removal of synthetic rod and insertion of tendon graft in hand or finger     | 9  | 77.8%  | 170.6 | 22.2% | 22.2% | 0.0% | 0.0% | 0.0% | 0.0% |
| 18 to 44 years | Transoral approach to skull base, brain stem or upper spinal cord for biopsy | 9  | 77.8%  | 160.7 | 0.0%  | 11.1% | 0.0% | 0.0% | 0.0% | 0.0% |
| 18 to 44 years | Scapulopexy                                                                  | 7  | 100.0% | 430.4 | 14.3% | 14.3% | 0.0% | 0.0% | 0.0% | 0.0% |
| 18 to 44 years | Ocular surface reconstruction                                                | 36 | 16.7%  | 13.5  | 0.0%  | 0.0%  | 0.0% | 0.0% | 0.0% | 0.0% |
| 18 to 44 years | Twist drill hole for subdural, intracerebral, or ventricular puncture        | 29 | 20.7%  | 181.1 | 6.9%  | 3.4%  | 0.0% | 0.0% | 0.0% | 0.0% |
| 18 to 44 years | Thoracotomy, with exploration                                                | 16 | 37.5%  | 93.3  | 6.3%  | 0.0%  | 0.0% | 0.0% | 0.0% | 0.0% |
| 18 to 44 years | Replacement, irrigation or revision of lumbosubarachnoid shunt               | 15 | 40.0%  | 90.3  | 0.0%  | 0.0%  | 0.0% | 0.0% | 0.0% | 0.0% |
| 18 to 44 years | Reconstruction of fingertip                                                  | 14 | 42.9%  | 49.8  | 0.0%  | 7.1%  | 0.0% | 0.0% | 0.0% | 0.0% |
| 18 to 44 years | Excision of radial head                                                      | 13 | 46.2%  | 68.8  | 7.7%  | 0.0%  | 0.0% | 0.0% | 0.0% | 0.0% |
| 18 to 44 years | Creation of lesion by stereotactic method                                    | 11 | 54.5%  | 288.4 | 0.0%  | 18.2% | 0.0% | 0.0% | 0.0% | 0.0% |
| 18 to 44 years | Excision of lesion of tendon sheath, forearm and/or wrist                    | 11 | 54.5%  | 242.0 | 0.0%  | 0.0%  | 0.0% | 0.0% | 0.0% | 0.0% |
| 18 to 44 years | Resection of palate or extensive resection of lesion                         | 11 | 54.5%  | 76.4  | 0.0%  | 0.0%  | 0.0% | 0.0% | 0.0% | 0.0% |
| 18 to 44 years | Adrenalectomy - open                                                         | 10 | 60.0%  | 126.3 | 40.0% | 10.0% | 0.0% | 0.0% | 0.0% | 0.0% |
| 18 to 44 years | Neurectomy                                                                   | 10 | 60.0%  | 126.0 | 0.0%  | 0.0%  | 0.0% | 0.0% | 0.0% | 0.0% |
| 18 to 44 years | Debridement of sternum                                                       | 9  | 66.7%  | 297.2 | 22.2% | 0.0%  | 0.0% | 0.0% | 0.0% | 0.0% |
| 18 to 44 years | Excision of cardiac tumor with cardiopulmonary bypass                        | 9  | 66.7%  | 313.9 | 33.3% | 0.0%  | 0.0% | 0.0% | 0.0% | 0.0% |
| 18 to 44 years | Hysterotomy                                                                  | 9  | 66.7%  | 105.3 | 11.1% | 0.0%  | 0.0% | 0.0% | 0.0% | 0.0% |
| 18 to 44 years | Intestinal procedure, resection and enterostomy                              | 9  | 66.7%  | 118.3 | 0.0%  | 0.0%  | 0.0% | 0.0% | 0.0% | 0.0% |
| 18 to 44 years | Omentectomy, epiploectomy, resection of omentum                              | 9  | 66.7%  | 94.7  | 22.2% | 11.1% | 0.0% | 0.0% | 0.0% | 0.0% |
| 18 to 44 years | Diaphragmatic hernia repair (other than neonatal)                            | 8  | 75.0%  | 238.4 | 25.0% | 12.5% | 0.0% | 0.0% | 0.0% | 0.0% |
| 18 to 44 years | Repair of paraesophageal hiatal hernia (including fundoplication)            | 8  | 75.0%  | 103.4 | 25.0% | 12.5% | 0.0% | 0.0% | 0.0% | 0.0% |
| 18 to 44 years | Resection of diaphragm                                                       | 8  | 75.0%  | 110.4 | 0.0%  | 0.0%  | 0.0% | 0.0% | 0.0% | 0.0% |

|                |                                                                              |     |        |       |       |       |      |      |      |      |
|----------------|------------------------------------------------------------------------------|-----|--------|-------|-------|-------|------|------|------|------|
| 18 to 44 years | Vestibuloplasty                                                              | 8   | 75.0%  | 120.0 | 0.0%  | 0.0%  | 0.0% | 0.0% | 0.0% | 0.0% |
| 18 to 44 years | Laparoscopic testicular procedure                                            | 7   | 85.7%  | 100.7 | 0.0%  | 0.0%  | 0.0% | 0.0% | 0.0% | 0.0% |
| 18 to 44 years | Colotomy                                                                     | 6   | 100.0% | 168.8 | 33.3% | 16.7% | 0.0% | 0.0% | 0.0% | 0.0% |
| 18 to 44 years | Laparoscopic biliary procedure                                               | 6   | 100.0% | 326.3 | 16.7% | 0.0%  | 0.0% | 0.0% | 0.0% | 0.0% |
| 18 to 44 years | Repair of syndactyly                                                         | 6   | 100.0% | 111.3 | 0.0%  | 0.0%  | 0.0% | 0.0% | 0.0% | 0.0% |
| 18 to 44 years | Injection of medication or other substance into Tenon's capsule              | 337 | 1.5%   | 4.9   | 0.3%  | 0.3%  | 0.0% | 0.0% | 0.0% | 0.0% |
| 18 to 44 years | Implantation of intrastromal corneal ring segments                           | 43  | 11.6%  | 6.6   | 0.0%  | 0.0%  | 0.0% | 0.0% | 0.0% | 0.0% |
| 18 to 44 years | Capsulotomy, foot and/or toes                                                | 38  | 13.2%  | 60.4  | 0.0%  | 0.0%  | 0.0% | 0.0% | 0.0% | 0.0% |
| 18 to 44 years | Pericardial drainage                                                         | 33  | 15.2%  | 34.3  | 0.0%  | 3.0%  | 0.0% | 0.0% | 0.0% | 0.0% |
| 18 to 44 years | Gastrostomy                                                                  | 20  | 25.0%  | 129.6 | 5.0%  | 0.0%  | 0.0% | 0.0% | 0.0% | 0.0% |
| 18 to 44 years | Surgical closure tracheostomy or fistula, with or without plastic repair     | 18  | 27.8%  | 53.1  | 0.0%  | 0.0%  | 0.0% | 0.0% | 0.0% | 0.0% |
| 18 to 44 years | Management of liver hemorrhage                                               | 14  | 35.7%  | 218.6 | 7.1%  | 0.0%  | 0.0% | 0.0% | 0.0% | 0.0% |
| 18 to 44 years | Thoracotomy, with control of traumatic hemorrhage and/or repair of lung tear | 14  | 35.7%  | 140.4 | 7.1%  | 0.0%  | 0.0% | 0.0% | 0.0% | 0.0% |
| 18 to 44 years | Insertion of testicular prosthesis                                           | 13  | 38.5%  | 33.7  | 0.0%  | 0.0%  | 0.0% | 0.0% | 0.0% | 0.0% |
| 18 to 44 years | Revision of stapedectomy or stapedotomy                                      | 13  | 38.5%  | 63.5  | 0.0%  | 15.4% | 0.0% | 0.0% | 0.0% | 0.0% |
| 18 to 44 years | Excision of lesion or tumor, dentoalveolar structures                        | 12  | 41.7%  | 26.8  | 0.0%  | 0.0%  | 0.0% | 0.0% | 0.0% | 0.0% |
| 18 to 44 years | Cleft lip repair                                                             | 11  | 45.5%  | 28.2  | 0.0%  | 0.0%  | 0.0% | 0.0% | 0.0% | 0.0% |
| 18 to 44 years | Insertion of orbital implant                                                 | 11  | 45.5%  | 39.8  | 0.0%  | 0.0%  | 0.0% | 0.0% | 0.0% | 0.0% |
| 18 to 44 years | Sympathectomy                                                                | 11  | 45.5%  | 328.9 | 9.1%  | 9.1%  | 0.0% | 0.0% | 0.0% | 0.0% |
| 18 to 44 years | Repair of choanal atresia                                                    | 10  | 50.0%  | 69.5  | 0.0%  | 0.0%  | 0.0% | 0.0% | 0.0% | 0.0% |
| 18 to 44 years | Sternal ostectomy, debridement, resection                                    | 10  | 50.0%  | 141.5 | 0.0%  | 0.0%  | 0.0% | 0.0% | 0.0% | 0.0% |
| 18 to 44 years | Closure of cystostomy                                                        | 9   | 55.6%  | 140.0 | 11.1% | 0.0%  | 0.0% | 0.0% | 0.0% | 0.0% |
| 18 to 44 years | Pyeloplasty                                                                  | 9   | 55.6%  | 64.4  | 11.1% | 0.0%  | 0.0% | 0.0% | 0.0% | 0.0% |
| 18 to 44 years | Removal or revision of orbital implant                                       | 9   | 55.6%  | 58.3  | 11.1% | 11.1% | 0.0% | 0.0% | 0.0% | 0.0% |
| 18 to 44 years | Suture or repair of testicular injury                                        | 9   | 55.6%  | 240.0 | 0.0%  | 0.0%  | 0.0% | 0.0% | 0.0% | 0.0% |
| 18 to 44 years | Plastic operation on urethral sphincter, vaginal approach                    | 8   | 62.5%  | 180.6 | 37.5% | 12.5% | 0.0% | 0.0% | 0.0% | 0.0% |
| 18 to 44 years | Tracheoplasty                                                                | 8   | 62.5%  | 65.3  | 0.0%  | 0.0%  | 0.0% | 0.0% | 0.0% | 0.0% |
| 18 to 44 years | Transfer of tendon of fingers                                                | 8   | 62.5%  | 75.3  | 0.0%  | 0.0%  | 0.0% | 0.0% | 0.0% | 0.0% |
| 18 to 44 years | Transplantation of pancreas                                                  | 8   | 62.5%  | 72.5  | 12.5% | 0.0%  | 0.0% | 0.0% | 0.0% | 0.0% |
| 18 to 44 years | Repair of fascial defect of leg                                              | 7   | 71.4%  | 257.1 | 0.0%  | 0.0%  | 0.0% | 0.0% | 0.0% | 0.0% |
| 18 to 44 years | Thrombectomy of arterial or venous graft                                     | 7   | 71.4%  | 526.1 | 14.3% | 0.0%  | 0.0% | 0.0% | 0.0% | 0.0% |
| 18 to 44 years | Excision of carotid body tumor                                               | 5   | 100.0% | 652.0 | 0.0%  | 0.0%  | 0.0% | 0.0% | 0.0% | 0.0% |
| 18 to 44 years | Pancreatic cyst or pseudocyst repair                                         | 5   | 100.0% | 438.4 | 40.0% | 0.0%  | 0.0% | 0.0% | 0.0% | 0.0% |

|                |                                                                                                |    |       |       |       |       |      |      |      |      |
|----------------|------------------------------------------------------------------------------------------------|----|-------|-------|-------|-------|------|------|------|------|
| 18 to 44 years | Aqueous shunt to extraocular equatorial plate reservoir                                        | 81 | 4.9%  | 17.8  | 0.0%  | 0.0%  | 0.0% | 0.0% | 0.0% | 0.0% |
| 18 to 44 years | Excision of lacrimal gland or lacrimal gland tumor                                             | 14 | 28.6% | 60.5  | 0.0%  | 0.0%  | 0.0% | 0.0% | 0.0% | 0.0% |
| 18 to 44 years | Revision of cranial neurostimulator pulse generator or receiver                                | 13 | 30.8% | 136.3 | 0.0%  | 7.7%  | 0.0% | 0.0% | 0.0% | 0.0% |
| 18 to 44 years | Repair of dural/cerebrospinal fluid leak, not requiring laminectomy                            | 12 | 33.3% | 109.6 | 8.3%  | 0.0%  | 0.0% | 0.0% | 0.0% | 0.0% |
| 18 to 44 years | Laparotomy                                                                                     | 11 | 36.4% | 141.1 | 9.1%  | 9.1%  | 0.0% | 0.0% | 0.0% | 0.0% |
| 18 to 44 years | Thoracoscopy, with pleurectomy                                                                 | 11 | 36.4% | 63.2  | 0.0%  | 0.0%  | 0.0% | 0.0% | 0.0% | 0.0% |
| 18 to 44 years | Closure of ureterocutaneous fistula                                                            | 10 | 40.0% | 100.3 | 0.0%  | 0.0%  | 0.0% | 0.0% | 0.0% | 0.0% |
| 18 to 44 years | Placement of enterostomy or cecostomy, tube open                                               | 9  | 44.4% | 262.1 | 33.3% | 0.0%  | 0.0% | 0.0% | 0.0% | 0.0% |
| 18 to 44 years | Arthroscopy of hand                                                                            | 8  | 50.0% | 39.7  | 0.0%  | 12.5% | 0.0% | 0.0% | 0.0% | 0.0% |
| 18 to 44 years | Repair of complex cardiac anomalies                                                            | 8  | 50.0% | 140.3 | 25.0% | 0.0%  | 0.0% | 0.0% | 0.0% | 0.0% |
| 18 to 44 years | Hyoid myotomy and suspension                                                                   | 7  | 57.1% | 66.4  | 28.6% | 14.3% | 0.0% | 0.0% | 0.0% | 0.0% |
| 18 to 44 years | Implantation or replacement of electromagnetic bone conduction hearing device in temporal bone | 7  | 57.1% | 60.4  | 14.3% | 14.3% | 0.0% | 0.0% | 0.0% | 0.0% |
| 18 to 44 years | Prophylactic treatment (nailing, pinning, plating or wiring) of bone, upper extremity          | 7  | 57.1% | 150.0 | 0.0%  | 0.0%  | 0.0% | 0.0% | 0.0% | 0.0% |
| 18 to 44 years | Radical resection of tonsil, tonsillar pillars, and/or retromolar trigone                      | 7  | 57.1% | 202.4 | 0.0%  | 0.0%  | 0.0% | 0.0% | 0.0% | 0.0% |
| 18 to 44 years | Repair of round window fistula                                                                 | 7  | 57.1% | 180.6 | 14.3% | 28.6% | 0.0% | 0.0% | 0.0% | 0.0% |
| 18 to 44 years | Arterial transposition                                                                         | 6  | 66.7% | 155.0 | 33.3% | 16.7% | 0.0% | 0.0% | 0.0% | 0.0% |
| 18 to 44 years | Pericardiectomy                                                                                | 6  | 66.7% | 153.3 | 0.0%  | 0.0%  | 0.0% | 0.0% | 0.0% | 0.0% |
| 18 to 44 years | Pyloroplasty                                                                                   | 6  | 66.7% | 111.3 | 0.0%  | 16.7% | 0.0% | 0.0% | 0.0% | 0.0% |
| 18 to 44 years | Reconstruction of vena cava, any method                                                        | 6  | 66.7% | 173.8 | 0.0%  | 16.7% | 0.0% | 0.0% | 0.0% | 0.0% |
| 18 to 44 years | Decompression of internal auditory canal                                                       | 5  | 80.0% | 90.0  | 0.0%  | 0.0%  | 0.0% | 0.0% | 0.0% | 0.0% |
| 18 to 44 years | Insertion of interlaminar/interspinous process stabilization/distraction device                | 5  | 80.0% | 296.0 | 20.0% | 0.0%  | 0.0% | 0.0% | 0.0% | 0.0% |
| 18 to 44 years | Osteoplasty of facial bones                                                                    | 5  | 80.0% | 56.0  | 0.0%  | 0.0%  | 0.0% | 0.0% | 0.0% | 0.0% |
| 18 to 44 years | Removal of esophageal sphincter augmentation device                                            | 5  | 80.0% | 512.5 | 20.0% | 20.0% | 0.0% | 0.0% | 0.0% | 0.0% |
| 18 to 44 years | Transcatheter pulmonary valve implantation                                                     | 56 | 5.4%  | 11.4  | 0.0%  | 1.8%  | 0.0% | 0.0% | 0.0% | 0.0% |
| 18 to 44 years | Thrombectomy or thrombolysis, percutaneous intracranial                                        | 34 | 8.8%  | 53.4  | 0.0%  | 0.0%  | 0.0% | 0.0% | 0.0% | 0.0% |
| 18 to 44 years | Removal of foreign body, intraocular                                                           | 23 | 13.0% | 13.5  | 0.0%  | 0.0%  | 0.0% | 0.0% | 0.0% | 0.0% |
| 18 to 44 years | Construction of intermarginal adhesions, median tarsorrhaphy, or canthorrhaphy                 | 16 | 18.8% | 17.3  | 0.0%  | 0.0%  | 0.0% | 0.0% | 0.0% | 0.0% |
| 18 to 44 years | Gastrojejunostomy                                                                              | 14 | 21.4% | 37.0  | 7.1%  | 0.0%  | 0.0% | 0.0% | 0.0% | 0.0% |
| 18 to 44 years | Osteotomy of spine                                                                             | 11 | 27.3% | 143.2 | 18.2% | 0.0%  | 0.0% | 0.0% | 0.0% | 0.0% |
| 18 to 44 years | Removal of transplanted renal allograft                                                        | 10 | 30.0% | 37.5  | 0.0%  | 0.0%  | 0.0% | 0.0% | 0.0% | 0.0% |
| 18 to 44 years | Intestinal procedure, excision of lesion without anastomosis, exteriorization or fistulization | 9  | 33.3% | 56.7  | 0.0%  | 0.0%  | 0.0% | 0.0% | 0.0% | 0.0% |

|                |                                                                               |     |        |       |       |       |      |      |      |      |
|----------------|-------------------------------------------------------------------------------|-----|--------|-------|-------|-------|------|------|------|------|
| 18 to 44 years | Revision of urinary-cutaneous anastomosis                                     | 9   | 33.3%  | 60.0  | 11.1% | 0.0%  | 0.0% | 0.0% | 0.0% | 0.0% |
| 18 to 44 years | Application of halo, including removal                                        | 7   | 42.9%  | 86.4  | 14.3% | 0.0%  | 0.0% | 0.0% | 0.0% | 0.0% |
| 18 to 44 years | Control of nasopharyngeal or oropharyngeal hemorrhage                         | 7   | 42.9%  | 197.9 | 0.0%  | 0.0%  | 0.0% | 0.0% | 0.0% | 0.0% |
| 18 to 44 years | Cutaneous appendico-vesicostomy                                               | 7   | 42.9%  | 24.6  | 0.0%  | 0.0%  | 0.0% | 0.0% | 0.0% | 0.0% |
| 18 to 44 years | Division of sternocleidomastoid                                               | 7   | 42.9%  | 268.7 | 0.0%  | 0.0%  | 0.0% | 0.0% | 0.0% | 0.0% |
| 18 to 44 years | Reconstruction of wrist                                                       | 7   | 42.9%  | 82.1  | 0.0%  | 0.0%  | 0.0% | 0.0% | 0.0% | 0.0% |
| 18 to 44 years | Resection of recurrent ovarian, tubal, primary peritoneal, uterine malignancy | 7   | 42.9%  | 44.6  | 0.0%  | 14.3% | 0.0% | 0.0% | 0.0% | 0.0% |
| 18 to 44 years | Excision of cystic hygroma                                                    | 6   | 50.0%  | 70.0  | 16.7% | 0.0%  | 0.0% | 0.0% | 0.0% | 0.0% |
| 18 to 44 years | Exploration, repair, and presacral drainage for rectal injury                 | 6   | 50.0%  | 62.5  | 0.0%  | 0.0%  | 0.0% | 0.0% | 0.0% | 0.0% |
| 18 to 44 years | Amputation of penis                                                           | 5   | 60.0%  | 75.0  | 0.0%  | 0.0%  | 0.0% | 0.0% | 0.0% | 0.0% |
| 18 to 44 years | Lengthening of hamstring tendon                                               | 5   | 60.0%  | 56.5  | 0.0%  | 20.0% | 0.0% | 0.0% | 0.0% | 0.0% |
| 18 to 44 years | Operative tissue ablation and reconstruction of atria - endoscopic            | 5   | 60.0%  | 107.2 | 0.0%  | 0.0%  | 0.0% | 0.0% | 0.0% | 0.0% |
| 18 to 44 years | Direct repair of aneurysm, pseudoaneurysm, or excision, lower extremity       | 4   | 75.0%  | 75.0  | 0.0%  | 0.0%  | 0.0% | 0.0% | 0.0% | 0.0% |
| 18 to 44 years | Drainage of retroperitoneal abscess - open                                    | 4   | 75.0%  | 60.0  | 0.0%  | 0.0%  | 0.0% | 0.0% | 0.0% | 0.0% |
| 18 to 44 years | Excision of lesion of tongue                                                  | 4   | 75.0%  | 67.5  | 25.0% | 0.0%  | 0.0% | 0.0% | 0.0% | 0.0% |
| 18 to 44 years | Filletted finger or toe flap, including preparation of recipient site         | 4   | 75.0%  | 106.3 | 0.0%  | 0.0%  | 0.0% | 0.0% | 0.0% | 0.0% |
| 18 to 44 years | Removal of entire lumbosubarachnoid shunt system without replacement          | 4   | 75.0%  | 132.5 | 0.0%  | 0.0%  | 0.0% | 0.0% | 0.0% | 0.0% |
| 18 to 44 years | Removal of prosthesis, upper extremity                                        | 4   | 75.0%  | 106.3 | 25.0% | 0.0%  | 0.0% | 0.0% | 0.0% | 0.0% |
| 18 to 44 years | Revision (including removal) of prosthetic vaginal graft - laparoscopic       | 4   | 75.0%  | 51.3  | 25.0% | 25.0% | 0.0% | 0.0% | 0.0% | 0.0% |
| 18 to 44 years | Sesamoidectomy, thumb or finger                                               | 4   | 75.0%  | 58.5  | 0.0%  | 0.0%  | 0.0% | 0.0% | 0.0% | 0.0% |
| 18 to 44 years | Suture of esophageal wound or injury                                          | 4   | 75.0%  | 193.8 | 0.0%  | 0.0%  | 0.0% | 0.0% | 0.0% | 0.0% |
| 18 to 44 years | Augmentation of mandibular body or angle                                      | 3   | 100.0% | 185.8 | 33.3% | 0.0%  | 0.0% | 0.0% | 0.0% | 0.0% |
| 18 to 44 years | Myocardial resection                                                          | 3   | 100.0% | 165.0 | 0.0%  | 0.0%  | 0.0% | 0.0% | 0.0% | 0.0% |
| 18 to 44 years | Destruction of localized lesion of retina                                     | 272 | 0.7%   | 0.6   | 0.0%  | 0.0%  | 0.0% | 0.0% | 0.0% | 0.0% |
| 18 to 44 years | Colpoperineorrhaphy                                                           | 39  | 5.1%   | 6.4   | 0.0%  | 0.0%  | 0.0% | 0.0% | 0.0% | 0.0% |
| 18 to 44 years | Surgical treatment of abortion                                                | 34  | 5.9%   | 6.6   | 0.0%  | 0.0%  | 0.0% | 0.0% | 0.0% | 0.0% |
| 18 to 44 years | Revision or repair of operative wound of anterior segment of eye              | 31  | 6.5%   | 4.8   | 0.0%  | 0.0%  | 0.0% | 0.0% | 0.0% | 0.0% |
| 18 to 44 years | Fistulization of sclera for glaucoma                                          | 28  | 7.1%   | 9.1   | 0.0%  | 0.0%  | 0.0% | 0.0% | 0.0% | 0.0% |
| 18 to 44 years | Canthoplasty                                                                  | 21  | 9.5%   | 10.0  | 0.0%  | 0.0%  | 0.0% | 0.0% | 0.0% | 0.0% |
| 18 to 44 years | Tracheostoma revision                                                         | 21  | 9.5%   | 38.1  | 0.0%  | 0.0%  | 0.0% | 0.0% | 0.0% | 0.0% |
| 18 to 44 years | Correction of lagophthalmos                                                   | 18  | 11.1%  | 9.6   | 0.0%  | 0.0%  | 0.0% | 0.0% | 0.0% | 0.0% |
| 18 to 44 years | Revision of tracheostomy scar                                                 | 11  | 18.2%  | 11.6  | 0.0%  | 0.0%  | 0.0% | 0.0% | 0.0% | 0.0% |

|                |                                                                                                                                                        |    |       |       |       |       |      |      |      |      |
|----------------|--------------------------------------------------------------------------------------------------------------------------------------------------------|----|-------|-------|-------|-------|------|------|------|------|
| 18 to 44 years | Pyloromyotomy, cutting of pyloric muscle (Fredet-Ramstedt type operation)                                                                              | 10 | 20.0% | 16.0  | 10.0% | 0.0%  | 0.0% | 0.0% | 0.0% | 0.0% |
| 18 to 44 years | Excision of tonsil tags                                                                                                                                | 8  | 25.0% | 120.0 | 0.0%  | 0.0%  | 0.0% | 0.0% | 0.0% | 0.0% |
| 18 to 44 years | Excision of pelvic pressure ulcer                                                                                                                      | 7  | 28.6% | 35.7  | 28.6% | 0.0%  | 0.0% | 0.0% | 0.0% | 0.0% |
| 18 to 44 years | Excision tracheal stenosis and anastomosis                                                                                                             | 7  | 28.6% | 342.9 | 14.3% | 0.0%  | 0.0% | 0.0% | 0.0% | 0.0% |
| 18 to 44 years | Osteoplasty of lower extremity                                                                                                                         | 7  | 28.6% | 63.6  | 0.0%  | 14.3% | 0.0% | 0.0% | 0.0% | 0.0% |
| 18 to 44 years | Esophagectomy                                                                                                                                          | 6  | 33.3% | 70.0  | 16.7% | 0.0%  | 0.0% | 0.0% | 0.0% | 0.0% |
| 18 to 44 years | Laparoscopic transection of vagus nerves                                                                                                               | 6  | 33.3% | 22.9  | 0.0%  | 0.0%  | 0.0% | 0.0% | 0.0% | 0.0% |
| 18 to 44 years | Laparoscopic ureteral procedure                                                                                                                        | 6  | 33.3% | 16.7  | 0.0%  | 0.0%  | 0.0% | 0.0% | 0.0% | 0.0% |
| 18 to 44 years | Cricopharyngeal myotomy                                                                                                                                | 5  | 40.0% | 15.0  | 0.0%  | 0.0%  | 0.0% | 0.0% | 0.0% | 0.0% |
| 18 to 44 years | Drainage of ovarian cyst(s), abdominal approach                                                                                                        | 5  | 40.0% | 43.0  | 0.0%  | 0.0%  | 0.0% | 0.0% | 0.0% | 0.0% |
| 18 to 44 years | Enterotomy                                                                                                                                             | 5  | 40.0% | 28.0  | 0.0%  | 0.0%  | 0.0% | 0.0% | 0.0% | 0.0% |
| 18 to 44 years | Epididymovasostomy, anastomosis of epididymis to vas deferens                                                                                          | 5  | 40.0% | 78.0  | 0.0%  | 0.0%  | 0.0% | 0.0% | 0.0% | 0.0% |
| 18 to 44 years | Insertion of ocular implants                                                                                                                           | 5  | 40.0% | 48.0  | 0.0%  | 0.0%  | 0.0% | 0.0% | 0.0% | 0.0% |
| 18 to 44 years | Insertion of ventricular assist device                                                                                                                 | 5  | 40.0% | 87.0  | 0.0%  | 0.0%  | 0.0% | 0.0% | 0.0% | 0.0% |
| 18 to 44 years | Lung transplant                                                                                                                                        | 5  | 40.0% | 50.5  | 20.0% | 0.0%  | 0.0% | 0.0% | 0.0% | 0.0% |
| 18 to 44 years | Orchiectomy - laparoscopic                                                                                                                             | 5  | 40.0% | 23.5  | 0.0%  | 0.0%  | 0.0% | 0.0% | 0.0% | 0.0% |
| 18 to 44 years | Ostectomy of scapula                                                                                                                                   | 5  | 40.0% | 135.0 | 20.0% | 0.0%  | 0.0% | 0.0% | 0.0% | 0.0% |
| 18 to 44 years | Pharyngoplasty                                                                                                                                         | 5  | 40.0% | 425.0 | 0.0%  | 0.0%  | 0.0% | 0.0% | 0.0% | 0.0% |
| 18 to 44 years | Pulmonary endarterectomy                                                                                                                               | 5  | 40.0% | 67.0  | 20.0% | 0.0%  | 0.0% | 0.0% | 0.0% | 0.0% |
| 18 to 44 years | Removal or repair of electromagnetic bone conduction hearing device in temporal bone                                                                   | 5  | 40.0% | 23.0  | 20.0% | 20.0% | 0.0% | 0.0% | 0.0% | 0.0% |
| 18 to 44 years | Resection of mediastinal cyst                                                                                                                          | 5  | 40.0% | 57.0  | 0.0%  | 0.0%  | 0.0% | 0.0% | 0.0% | 0.0% |
| 18 to 44 years | Excision of lesion of palate, uvula                                                                                                                    | 4  | 50.0% | 293.8 | 0.0%  | 0.0%  | 0.0% | 0.0% | 0.0% | 0.0% |
| 18 to 44 years | Excision of penile plaque                                                                                                                              | 4  | 50.0% | 56.3  | 0.0%  | 0.0%  | 0.0% | 0.0% | 0.0% | 0.0% |
| 18 to 44 years | Facelift                                                                                                                                               | 4  | 50.0% | 47.5  | 0.0%  | 0.0%  | 0.0% | 0.0% | 0.0% | 0.0% |
| 18 to 44 years | Hernia repair, lumbar                                                                                                                                  | 4  | 50.0% | 71.3  | 0.0%  | 0.0%  | 0.0% | 0.0% | 0.0% | 0.0% |
| 18 to 44 years | Laparoscopic endocrine procedure                                                                                                                       | 4  | 50.0% | 68.8  | 0.0%  | 0.0%  | 0.0% | 0.0% | 0.0% | 0.0% |
| 18 to 44 years | Lymphangiectomy or other operations on lymphatic channels                                                                                              | 4  | 50.0% | 37.5  | 25.0% | 25.0% | 0.0% | 0.0% | 0.0% | 0.0% |
| 18 to 44 years | Repair of ileoanal pouch fistula/sinus                                                                                                                 | 4  | 50.0% | 37.5  | 25.0% | 0.0%  | 0.0% | 0.0% | 0.0% | 0.0% |
| 18 to 44 years | Repair of pulmonary atresia with ventricular septal defect, by construction or replacement of conduit from right or left ventricle to pulmonary artery | 4  | 50.0% | 75.0  | 25.0% | 0.0%  | 0.0% | 0.0% | 0.0% | 0.0% |
| 18 to 44 years | Thoracotomy, with resection-plication of bullae, includes any pleural procedure when performed                                                         | 4  | 50.0% | 53.8  | 25.0% | 0.0%  | 0.0% | 0.0% | 0.0% | 0.0% |
| 18 to 44 years | Epiphyseal or hemiepiphyseal arrest, lower extremity                                                                                                   | 3  | 66.7% | 383.3 | 0.0%  | 0.0%  | 0.0% | 0.0% | 0.0% | 0.0% |

|                |                                                                                                       |    |        |        |        |       |      |      |      |      |
|----------------|-------------------------------------------------------------------------------------------------------|----|--------|--------|--------|-------|------|------|------|------|
| 18 to 44 years | Intestinal procedure, excision of ileoanal reservoir with ileostomy                                   | 3  | 66.7%  | 1675.0 | 33.3%  | 33.3% | 0.0% | 0.0% | 0.0% | 0.0% |
| 18 to 44 years | Laparoscopic appendix procedure                                                                       | 3  | 66.7%  | 75.0   | 0.0%   | 0.0%  | 0.0% | 0.0% | 0.0% | 0.0% |
| 18 to 44 years | Laryngeal reinnervation by neuromuscular pedicle                                                      | 3  | 66.7%  | 70.8   | 0.0%   | 0.0%  | 0.0% | 0.0% | 0.0% | 0.0% |
| 18 to 44 years | Pollicization of a digit                                                                              | 3  | 66.7%  | 62.5   | 0.0%   | 0.0%  | 0.0% | 0.0% | 0.0% | 0.0% |
| 18 to 44 years | Removal of ocular implant                                                                             | 3  | 66.7%  | 107.5  | 0.0%   | 0.0%  | 0.0% | 0.0% | 0.0% | 0.0% |
| 18 to 44 years | Repair of arteriovenous fistula, congenital                                                           | 3  | 66.7%  | 83.3   | 33.3%  | 0.0%  | 0.0% | 0.0% | 0.0% | 0.0% |
| 18 to 44 years | Thoracoscopy, control of hemorrhage                                                                   | 3  | 66.7%  | 300.0  | 0.0%   | 0.0%  | 0.0% | 0.0% | 0.0% | 0.0% |
| 18 to 44 years | Construction of tracheoesophageal fistula and subsequent insertion of an alaryngeal speech prosthesis | 2  | 100.0% | 470.0  | 100.0% | 0.0%  | 0.0% | 0.0% | 0.0% | 0.0% |
| 18 to 44 years | Disarticulation through wrist                                                                         | 2  | 100.0% | 205.0  | 50.0%  | 0.0%  | 0.0% | 0.0% | 0.0% | 0.0% |
| 18 to 44 years | Division of aberrant vessel (vascular ring)                                                           | 2  | 100.0% | 180.0  | 50.0%  | 0.0%  | 0.0% | 0.0% | 0.0% | 0.0% |
| 18 to 44 years | Drainage of subdiaphragmatic or subphrenic abscess - open                                             | 2  | 100.0% | 170.0  | 0.0%   | 0.0%  | 0.0% | 0.0% | 0.0% | 0.0% |
| 18 to 44 years | Gingivoplasty                                                                                         | 2  | 100.0% | 150.0  | 50.0%  | 0.0%  | 0.0% | 0.0% | 0.0% | 0.0% |
| 18 to 44 years | Repair of esophageal varices                                                                          | 2  | 100.0% | 138.8  | 50.0%  | 0.0%  | 0.0% | 0.0% | 0.0% | 0.0% |
| 18 to 44 years | Repair of isolated partial anomalous pulmonary venous return (eg, Scimitar Syndrome)                  | 2  | 100.0% | 431.3  | 0.0%   | 0.0%  | 0.0% | 0.0% | 0.0% | 0.0% |
| 18 to 44 years | Repair of oval window fistula                                                                         | 2  | 100.0% | 1012.5 | 0.0%   | 0.0%  | 0.0% | 0.0% | 0.0% | 0.0% |
| 18 to 44 years | Syndactylization, toes                                                                                | 2  | 100.0% | 87.5   | 0.0%   | 50.0% | 0.0% | 0.0% | 0.0% | 0.0% |
| 18 to 44 years | Thoracostomy, chest drainage with rib resection or flap                                               | 2  | 100.0% | 300.0  | 100.0% | 0.0%  | 0.0% | 0.0% | 0.0% | 0.0% |
| 18 to 44 years | Ureteroplasty                                                                                         | 2  | 100.0% | 202.5  | 0.0%   | 0.0%  | 0.0% | 0.0% | 0.0% | 0.0% |
| 18 to 44 years | Ureteroureterostomy                                                                                   | 2  | 100.0% | 120.0  | 0.0%   | 0.0%  | 0.0% | 0.0% | 0.0% | 0.0% |
| 18 to 44 years | Placement of needle for intraosseous infusion                                                         | 86 | 1.2%   | 0.7    | 0.0%   | 0.0%  | 0.0% | 0.0% | 0.0% | 0.0% |
| 18 to 44 years | Multiple punctures of anterior cornea (eg, for corneal erosion, tattoo)                               | 32 | 3.1%   | 3.8    | 0.0%   | 0.0%  | 0.0% | 0.0% | 0.0% | 0.0% |
| 18 to 44 years | Removal of lens material                                                                              | 30 | 3.3%   | 2.5    | 0.0%   | 0.0%  | 0.0% | 0.0% | 0.0% | 0.0% |
| 18 to 44 years | Goniotomy                                                                                             | 26 | 3.8%   | 11.5   | 0.0%   | 0.0%  | 0.0% | 0.0% | 0.0% | 0.0% |
| 18 to 44 years | Iridectomy, with corneoscleral or corneal section                                                     | 17 | 5.9%   | 3.5    | 0.0%   | 0.0%  | 0.0% | 0.0% | 0.0% | 0.0% |
| 18 to 44 years | Exchange of intraocular lens                                                                          | 15 | 6.7%   | 3.0    | 0.0%   | 0.0%  | 0.0% | 0.0% | 0.0% | 0.0% |
| 18 to 44 years | Revision of aqueous shunt to extraocular equatorial plate reservoir                                   | 15 | 6.7%   | 6.7    | 0.0%   | 0.0%  | 0.0% | 0.0% | 0.0% | 0.0% |
| 18 to 44 years | Cardiac procedure, unlisted                                                                           | 14 | 7.1%   | 11.4   | 0.0%   | 0.0%  | 0.0% | 0.0% | 0.0% | 0.0% |
| 18 to 44 years | Severing adhesions of anterior segment of eye                                                         | 13 | 7.7%   | 2.9    | 0.0%   | 0.0%  | 0.0% | 0.0% | 0.0% | 0.0% |
| 18 to 44 years | Cardiac ablation                                                                                      | 11 | 9.1%   | 9.1    | 0.0%   | 0.0%  | 0.0% | 0.0% | 0.0% | 0.0% |
| 18 to 44 years | Transcatheter placement of intravascular stent(s), intracranial                                       | 10 | 10.0%  | 15.0   | 0.0%   | 0.0%  | 0.0% | 0.0% | 0.0% | 0.0% |
| 18 to 44 years | Repair of symblepharon                                                                                | 8  | 12.5%  | 15.0   | 0.0%   | 0.0%  | 0.0% | 0.0% | 0.0% | 0.0% |

|                |                                                                                      |   |       |       |       |       |      |      |      |      |
|----------------|--------------------------------------------------------------------------------------|---|-------|-------|-------|-------|------|------|------|------|
| 18 to 44 years | Debridement of shoulder                                                              | 7 | 14.3% | 30.0  | 0.0%  | 0.0%  | 0.0% | 0.0% | 0.0% | 0.0% |
| 18 to 44 years | Drainage of perirenal or renal abscess - open                                        | 7 | 14.3% | 42.9  | 0.0%  | 0.0%  | 0.0% | 0.0% | 0.0% | 0.0% |
| 18 to 44 years | Drainage of ovarian abscess                                                          | 6 | 16.7% | 35.0  | 0.0%  | 0.0%  | 0.0% | 0.0% | 0.0% | 0.0% |
| 18 to 44 years | Endovascular aortic valve replacement                                                | 6 | 16.7% | 10.0  | 0.0%  | 0.0%  | 0.0% | 0.0% | 0.0% | 0.0% |
| 18 to 44 years | Nasal septum reconstruction                                                          | 6 | 16.7% | 8.3   | 0.0%  | 0.0%  | 0.0% | 0.0% | 0.0% | 0.0% |
| 18 to 44 years | Resection or incision of subvalvular tissue for discrete subvalvular aortic stenosis | 6 | 16.7% | 18.8  | 0.0%  | 0.0%  | 0.0% | 0.0% | 0.0% | 0.0% |
| 18 to 44 years | Heart transplant                                                                     | 5 | 20.0% | 20.0  | 20.0% | 0.0%  | 0.0% | 0.0% | 0.0% | 0.0% |
| 18 to 44 years | Nephrolithotomy                                                                      | 5 | 20.0% | 21.0  | 0.0%  | 0.0%  | 0.0% | 0.0% | 0.0% | 0.0% |
| 18 to 44 years | Repair of cardiac wound                                                              | 5 | 20.0% | 28.0  | 20.0% | 0.0%  | 0.0% | 0.0% | 0.0% | 0.0% |
| 18 to 44 years | Septal or other intranasal dermatoplasty                                             | 5 | 20.0% | 15.0  | 0.0%  | 0.0%  | 0.0% | 0.0% | 0.0% | 0.0% |
| 18 to 44 years | Esophagogastric fundoplasty                                                          | 4 | 25.0% | 37.5  | 0.0%  | 0.0%  | 0.0% | 0.0% | 0.0% | 0.0% |
| 18 to 44 years | Transrectal drainage of pelvic abscess                                               | 4 | 25.0% | 18.8  | 0.0%  | 0.0%  | 0.0% | 0.0% | 0.0% | 0.0% |
| 18 to 44 years | Intestinal procedure, strictuloplasty                                                | 3 | 33.3% | 160.0 | 33.3% | 33.3% | 0.0% | 0.0% | 0.0% | 0.0% |
| 18 to 44 years | Laryngotomy                                                                          | 3 | 33.3% | 33.3  | 0.0%  | 0.0%  | 0.0% | 0.0% | 0.0% | 0.0% |
| 18 to 44 years | Marsupialization of urethral diverticulum, male or female                            | 3 | 33.3% | 30.0  | 0.0%  | 0.0%  | 0.0% | 0.0% | 0.0% | 0.0% |
| 18 to 44 years | Removal of hip prosthesis                                                            | 3 | 33.3% | 200.0 | 0.0%  | 33.3% | 0.0% | 0.0% | 0.0% | 0.0% |
| 18 to 44 years | Thoracotomy, with removal of intrapleural foreign body or fibrin deposit             | 3 | 33.3% | 12.5  | 0.0%  | 0.0%  | 0.0% | 0.0% | 0.0% | 0.0% |
| 18 to 44 years | Thrombectomy                                                                         | 3 | 33.3% | 70.0  | 33.3% | 0.0%  | 0.0% | 0.0% | 0.0% | 0.0% |
| 18 to 44 years | Arthrotomy of temporomandibular joint                                                | 2 | 50.0% | 67.5  | 0.0%  | 0.0%  | 0.0% | 0.0% | 0.0% | 0.0% |
| 18 to 44 years | Corneal relaxing incision for correction of surgically induced astigmatism           | 2 | 50.0% | 25.0  | 0.0%  | 0.0%  | 0.0% | 0.0% | 0.0% | 0.0% |
| 18 to 44 years | Epiglottidectomy                                                                     | 2 | 50.0% | 20.0  | 0.0%  | 0.0%  | 0.0% | 0.0% | 0.0% | 0.0% |
| 18 to 44 years | Excision of ampulla of Vater                                                         | 2 | 50.0% | 112.5 | 0.0%  | 0.0%  | 0.0% | 0.0% | 0.0% | 0.0% |
| 18 to 44 years | Excision of lesion of pancreas (eg, cyst, adenoma)                                   | 2 | 50.0% | 31.5  | 0.0%  | 0.0%  | 0.0% | 0.0% | 0.0% | 0.0% |
| 18 to 44 years | Excision of osseous tuberosities, dentoalveolar structures                           | 2 | 50.0% | 45.0  | 0.0%  | 0.0%  | 0.0% | 0.0% | 0.0% | 0.0% |
| 18 to 44 years | Laparoscopic esophagus procedure                                                     | 2 | 50.0% | 90.0  | 0.0%  | 0.0%  | 0.0% | 0.0% | 0.0% | 0.0% |
| 18 to 44 years | Liver debridement                                                                    | 2 | 50.0% | 56.3  | 0.0%  | 0.0%  | 0.0% | 0.0% | 0.0% | 0.0% |
| 18 to 44 years | Major reconstruction, chest wall                                                     | 2 | 50.0% | 56.3  | 50.0% | 0.0%  | 0.0% | 0.0% | 0.0% | 0.0% |
| 18 to 44 years | Nephrostomy and/or nephrotomy                                                        | 2 | 50.0% | 90.0  | 0.0%  | 0.0%  | 0.0% | 0.0% | 0.0% | 0.0% |
| 18 to 44 years | Penile reconstruction                                                                | 2 | 50.0% | 25.0  | 0.0%  | 0.0%  | 0.0% | 0.0% | 0.0% | 0.0% |
| 18 to 44 years | Prostatectomy - open                                                                 | 2 | 50.0% | 675.0 | 50.0% | 0.0%  | 0.0% | 0.0% | 0.0% | 0.0% |
| 18 to 44 years | Quadricepsplasty (eg, Bennett or Thompson type)                                      | 2 | 50.0% | 78.8  | 0.0%  | 0.0%  | 0.0% | 0.0% | 0.0% | 0.0% |
| 18 to 44 years | Removal and/or replacement of inflatable urethral/bladder neck sphincter             | 2 | 50.0% | 37.5  | 0.0%  | 0.0%  | 0.0% | 0.0% | 0.0% | 0.0% |



|                |                                                                                                   |   |        |        |        |        |      |      |      |      |
|----------------|---------------------------------------------------------------------------------------------------|---|--------|--------|--------|--------|------|------|------|------|
| 18 to 44 years | Removal of prosthesis, shoulder                                                                   | 2 | 50.0%  | 75.0   | 50.0%  | 0.0%   | 0.0% | 0.0% | 0.0% | 0.0% |
| 18 to 44 years | Repair of postinfarction ventricular septal defect                                                | 2 | 50.0%  | 45.0   | 50.0%  | 0.0%   | 0.0% | 0.0% | 0.0% | 0.0% |
| 18 to 44 years | Resection of pharyngeal wall                                                                      | 2 | 50.0%  | 135.0  | 0.0%   | 0.0%   | 0.0% | 0.0% | 0.0% | 0.0% |
| 18 to 44 years | Resection or debridement of pancreas and peripancreatic tissue for acute necrotizing pancreatitis | 2 | 50.0%  | 112.5  | 50.0%  | 0.0%   | 0.0% | 0.0% | 0.0% | 0.0% |
| 18 to 44 years | Splenorrhaphy                                                                                     | 2 | 50.0%  | 37.5   | 0.0%   | 0.0%   | 0.0% | 0.0% | 0.0% | 0.0% |
| 18 to 44 years | Thoracotomy, for postoperative complications                                                      | 2 | 50.0%  | 150.0  | 0.0%   | 0.0%   | 0.0% | 0.0% | 0.0% | 0.0% |
| 18 to 44 years | Transfer of adductor to ischium                                                                   | 2 | 50.0%  | 675.0  | 50.0%  | 50.0%  | 0.0% | 0.0% | 0.0% | 0.0% |
| 18 to 44 years | Vesicourethropexy or urethropexy, anterior                                                        | 2 | 50.0%  | 37.5   | 50.0%  | 0.0%   | 0.0% | 0.0% | 0.0% | 0.0% |
| 18 to 44 years | Vesiculotomy                                                                                      | 2 | 50.0%  | 60.0   | 0.0%   | 0.0%   | 0.0% | 0.0% | 0.0% | 0.0% |
| 18 to 44 years | Cardiotomy, exploratory                                                                           | 1 | 100.0% | 525.0  | 100.0% | 0.0%   | 0.0% | 0.0% | 0.0% | 0.0% |
| 18 to 44 years | Closure of postauricular fistula, mastoid                                                         | 1 | 100.0% | 1125.0 | 100.0% | 0.0%   | 0.0% | 0.0% | 0.0% | 0.0% |
| 18 to 44 years | Closure of salivary fistula                                                                       | 1 | 100.0% | 50.0   | 0.0%   | 0.0%   | 0.0% | 0.0% | 0.0% | 0.0% |
| 18 to 44 years | Closure of vesicouterine fistula                                                                  | 1 | 100.0% | 280.0  | 0.0%   | 0.0%   | 0.0% | 0.0% | 0.0% | 0.0% |
| 18 to 44 years | Direct or patch closure, sinus venosus, with or without anomalous pulmonary venous drainage       | 1 | 100.0% | 150.0  | 100.0% | 0.0%   | 0.0% | 0.0% | 0.0% | 0.0% |
| 18 to 44 years | Epiphyseal arrest by epiphysiodesis or stapling; distal radius and/or ulna                        | 1 | 100.0% | 112.5  | 0.0%   | 0.0%   | 0.0% | 0.0% | 0.0% | 0.0% |
| 18 to 44 years | Excision of lesion of mesentery                                                                   | 1 | 100.0% | 1500.0 | 0.0%   | 0.0%   | 0.0% | 0.0% | 0.0% | 0.0% |
| 18 to 44 years | Excision or unroofing of cyst(s) of kidney                                                        | 1 | 100.0% | 150.0  | 100.0% | 0.0%   | 0.0% | 0.0% | 0.0% | 0.0% |
| 18 to 44 years | Incision of anal septum (infant)                                                                  | 1 | 100.0% | 450.0  | 0.0%   | 0.0%   | 0.0% | 0.0% | 0.0% | 0.0% |
| 18 to 44 years | Insertion of vascular pedicle into carpal bone (eg, Hori procedure)                               | 1 | 100.0% | 125.0  | 0.0%   | 0.0%   | 0.0% | 0.0% | 0.0% | 0.0% |
| 18 to 44 years | Labyrinthectomy                                                                                   | 1 | 100.0% | 1500.0 | 0.0%   | 0.0%   | 0.0% | 0.0% | 0.0% | 0.0% |
| 18 to 44 years | Laryngectomy, pharyngectomy, pharyngolaryngectomy                                                 | 1 | 100.0% | 50.0   | 0.0%   | 0.0%   | 0.0% | 0.0% | 0.0% | 0.0% |
| 18 to 44 years | Meniscectomy of temporomandibular joint                                                           | 1 | 100.0% | 90.0   | 0.0%   | 0.0%   | 0.0% | 0.0% | 0.0% | 0.0% |
| 18 to 44 years | Operative tissue ablation and reconstruction of atria - open                                      | 1 | 100.0% | 225.0  | 0.0%   | 0.0%   | 0.0% | 0.0% | 0.0% | 0.0% |
| 18 to 44 years | Pelvic exenteration                                                                               | 1 | 100.0% | 90.0   | 0.0%   | 0.0%   | 0.0% | 0.0% | 0.0% | 0.0% |
| 18 to 44 years | Pulmonary artery to aorta bypass                                                                  | 1 | 100.0% | 30.0   | 0.0%   | 100.0% | 0.0% | 0.0% | 0.0% | 0.0% |
| 18 to 44 years | Reconstruction of diaphragm                                                                       | 1 | 100.0% | 270.0  | 0.0%   | 0.0%   | 0.0% | 0.0% | 0.0% | 0.0% |
| 18 to 44 years | Removal of epithelial downgrowth, anterior chamber of eye                                         | 1 | 100.0% | 750.0  | 0.0%   | 0.0%   | 0.0% | 0.0% | 0.0% | 0.0% |
| 18 to 44 years | Removal of intestinal transplant                                                                  | 1 | 100.0% | 112.5  | 0.0%   | 100.0% | 0.0% | 0.0% | 0.0% | 0.0% |
| 18 to 44 years | Repair of anterior palate, including vomer flap                                                   | 1 | 100.0% | 825.0  | 0.0%   | 0.0%   | 0.0% | 0.0% | 0.0% | 0.0% |
| 18 to 44 years | Repair of encephalocele, skull vault, including cranioplasty                                      | 1 | 100.0% | 2100.0 | 0.0%   | 0.0%   | 0.0% | 0.0% | 0.0% | 0.0% |
| 18 to 44 years | Resection of apical lung tumor                                                                    | 1 | 100.0% | 225.0  | 100.0% | 0.0%   | 0.0% | 0.0% | 0.0% | 0.0% |

|                |                                                                                                      |    |        |       |        |      |      |      |      |      |
|----------------|------------------------------------------------------------------------------------------------------|----|--------|-------|--------|------|------|------|------|------|
| 18 to 44 years | Sequestrectomy of bone in upper extremity                                                            | 1  | 100.0% | 112.5 | 0.0%   | 0.0% | 0.0% | 0.0% | 0.0% | 0.0% |
| 18 to 44 years | Sequestrectomy of shoulder                                                                           | 1  | 100.0% | 140.0 | 0.0%   | 0.0% | 0.0% | 0.0% | 0.0% | 0.0% |
| 18 to 44 years | Transfer external oblique muscle to greater trochanter including fascial or tendon extension (graft) | 1  | 100.0% | 225.0 | 0.0%   | 0.0% | 0.0% | 0.0% | 0.0% | 0.0% |
| 18 to 44 years | Transplantation of testis(es) to thigh                                                               | 1  | 100.0% | 187.5 | 100.0% | 0.0% | 0.0% | 0.0% | 0.0% | 0.0% |
| 18 to 44 years | Ureterolithotomy - laparoscopic                                                                      | 1  | 100.0% | 100.0 | 0.0%   | 0.0% | 0.0% | 0.0% | 0.0% | 0.0% |
| 18 to 44 years | Urinary undiversion                                                                                  | 1  | 100.0% | 45.0  | 0.0%   | 0.0% | 0.0% | 0.0% | 0.0% | 0.0% |
| 18 to 44 years | Insertion of intraocular lens prosthesis, not associated with concurrent cataract removal            | 19 | 0.0%   | 0.0   | 0.0%   | 0.0% | 0.0% | 0.0% | 0.0% | 0.0% |
| 18 to 44 years | Repositioning of intraocular lens prosthesis, requiring an incision                                  | 13 | 0.0%   | 0.0   | 0.0%   | 0.0% | 0.0% | 0.0% | 0.0% | 0.0% |
| 18 to 44 years | Transcatheter placement of intravascular stent - percutaneous                                        | 12 | 0.0%   | 0.0   | 0.0%   | 0.0% | 0.0% | 0.0% | 0.0% | 0.0% |
| 18 to 44 years | Venous bypass, abdominal - open                                                                      | 12 | 0.0%   | 0.0   | 0.0%   | 0.0% | 0.0% | 0.0% | 0.0% | 0.0% |
| 18 to 44 years | Thoracotomy, with cardiac massage                                                                    | 11 | 0.0%   | 0.0   | 0.0%   | 0.0% | 0.0% | 0.0% | 0.0% | 0.0% |
| 18 to 44 years | ECMO                                                                                                 | 8  | 0.0%   | 0.0   | 0.0%   | 0.0% | 0.0% | 0.0% | 0.0% | 0.0% |
| 18 to 44 years | Excision of cervical stump                                                                           | 8  | 0.0%   | 0.0   | 0.0%   | 0.0% | 0.0% | 0.0% | 0.0% | 0.0% |
| 18 to 44 years | Paracentesis of anterior chamber of eye                                                              | 8  | 0.0%   | 0.0   | 0.0%   | 0.0% | 0.0% | 0.0% | 0.0% | 0.0% |
| 18 to 44 years | Urethrorrhaphy                                                                                       | 7  | 0.0%   | 0.0   | 0.0%   | 0.0% | 0.0% | 0.0% | 0.0% | 0.0% |
| 18 to 44 years | Excision of lesion, conjunctiva                                                                      | 6  | 0.0%   | 0.0   | 0.0%   | 0.0% | 0.0% | 0.0% | 0.0% | 0.0% |
| 18 to 44 years | Fetal shunt placement, including ultrasound guidance                                                 | 6  | 0.0%   | 0.0   | 0.0%   | 0.0% | 0.0% | 0.0% | 0.0% | 0.0% |
| 18 to 44 years | Canthopexy                                                                                           | 5  | 0.0%   | 0.0   | 0.0%   | 0.0% | 0.0% | 0.0% | 0.0% | 0.0% |
| 18 to 44 years | Laparoscopic obstetric procedure                                                                     | 5  | 0.0%   | 0.0   | 0.0%   | 0.0% | 0.0% | 0.0% | 0.0% | 0.0% |
| 18 to 44 years | Pterygomaxillary fossa surgery                                                                       | 5  | 0.0%   | 0.0   | 0.0%   | 0.0% | 0.0% | 0.0% | 0.0% | 0.0% |
| 18 to 44 years | Reconstruction of eyelid                                                                             | 5  | 0.0%   | 0.0   | 0.0%   | 0.0% | 0.0% | 0.0% | 0.0% | 0.0% |
| 18 to 44 years | Transcatheter mitral valve repair                                                                    | 5  | 0.0%   | 0.0   | 0.0%   | 0.0% | 0.0% | 0.0% | 0.0% | 0.0% |
| 18 to 44 years | Aspiration or release of vitreous, subretinal or choroidal fluid, pars plana approach                | 4  | 0.0%   | 0.0   | 0.0%   | 0.0% | 0.0% | 0.0% | 0.0% | 0.0% |
| 18 to 44 years | Induced abortion                                                                                     | 4  | 0.0%   | 0.0   | 0.0%   | 0.0% | 0.0% | 0.0% | 0.0% | 0.0% |
| 18 to 44 years | Keratomileusis                                                                                       | 4  | 0.0%   | 0.0   | 0.0%   | 0.0% | 0.0% | 0.0% | 0.0% | 0.0% |
| 18 to 44 years | Repair of iris, ciliary body                                                                         | 4  | 0.0%   | 0.0   | 0.0%   | 0.0% | 0.0% | 0.0% | 0.0% | 0.0% |
| 18 to 44 years | Suture of iris, ciliary body                                                                         | 4  | 0.0%   | 0.0   | 0.0%   | 0.0% | 0.0% | 0.0% | 0.0% | 0.0% |
| 18 to 44 years | Thoracoscopy, creation of pericardial window                                                         | 4  | 0.0%   | 0.0   | 0.0%   | 0.0% | 0.0% | 0.0% | 0.0% | 0.0% |
| 18 to 44 years | Duodenotomy                                                                                          | 3  | 0.0%   | 0.0   | 0.0%   | 0.0% | 0.0% | 0.0% | 0.0% | 0.0% |
| 18 to 44 years | Excision of aural glomus tumor                                                                       | 3  | 0.0%   | 0.0   | 0.0%   | 0.0% | 0.0% | 0.0% | 0.0% | 0.0% |
| 18 to 44 years | Excision of ischial bursa                                                                            | 3  | 0.0%   | 0.0   | 0.0%   | 0.0% | 0.0% | 0.0% | 0.0% | 0.0% |
| 18 to 44 years | Excision of lesion, esophagus                                                                        | 3  | 0.0%   | 0.0   | 0.0%   | 0.0% | 0.0% | 0.0% | 0.0% | 0.0% |

|                |                                                                                             |   |      |     |      |      |      |      |      |      |
|----------------|---------------------------------------------------------------------------------------------|---|------|-----|------|------|------|------|------|------|
| 18 to 44 years | Gender affirming procedure, female to male                                                  | 3 | 0.0% | 0.0 | 0.0% | 0.0% | 0.0% | 0.0% | 0.0% | 0.0% |
| 18 to 44 years | Implantation of intravitreal drug delivery system, includes concomitant removal of vitreous | 3 | 0.0% | 0.0 | 0.0% | 0.0% | 0.0% | 0.0% | 0.0% | 0.0% |
| 18 to 44 years | Removal of foreign body from deep penile tissue (eg, plastic implant)                       | 3 | 0.0% | 0.0 | 0.0% | 0.0% | 0.0% | 0.0% | 0.0% | 0.0% |
| 18 to 44 years | Abdomino-vaginal vesical neck suspension                                                    | 2 | 0.0% | 0.0 | 0.0% | 0.0% | 0.0% | 0.0% | 0.0% | 0.0% |
| 18 to 44 years | Angioplasty, intracranial - percutaneous                                                    | 2 | 0.0% | 0.0 | 0.0% | 0.0% | 0.0% | 0.0% | 0.0% | 0.0% |
| 18 to 44 years | Condylectomy of temporomandibular joint                                                     | 2 | 0.0% | 0.0 | 0.0% | 0.0% | 0.0% | 0.0% | 0.0% | 0.0% |
| 18 to 44 years | Construction of artificial vagina                                                           | 2 | 0.0% | 0.0 | 0.0% | 0.0% | 0.0% | 0.0% | 0.0% | 0.0% |
| 18 to 44 years | Craniofacial, orbitocranial, bicoronal approach to anterior cranial fossa                   | 2 | 0.0% | 0.0 | 0.0% | 0.0% | 0.0% | 0.0% | 0.0% | 0.0% |
| 18 to 44 years | Denervation of hip joint                                                                    | 2 | 0.0% | 0.0 | 0.0% | 0.0% | 0.0% | 0.0% | 0.0% | 0.0% |
| 18 to 44 years | Diverticulectomy of hypopharynx or esophagus                                                | 2 | 0.0% | 0.0 | 0.0% | 0.0% | 0.0% | 0.0% | 0.0% | 0.0% |
| 18 to 44 years | Drainage of salivary gland abscess                                                          | 2 | 0.0% | 0.0 | 0.0% | 0.0% | 0.0% | 0.0% | 0.0% | 0.0% |
| 18 to 44 years | Excision of dermoid cyst, nose                                                              | 2 | 0.0% | 0.0 | 0.0% | 0.0% | 0.0% | 0.0% | 0.0% | 0.0% |
| 18 to 44 years | Hysteroplasty, repair of uterine anomaly (Strassman type)                                   | 2 | 0.0% | 0.0 | 0.0% | 0.0% | 0.0% | 0.0% | 0.0% | 0.0% |
| 18 to 44 years | Laser enucleation of the prostate with morcellation                                         | 2 | 0.0% | 0.0 | 0.0% | 0.0% | 0.0% | 0.0% | 0.0% | 0.0% |
| 18 to 44 years | Radical excision of external auditory canal lesion                                          | 2 | 0.0% | 0.0 | 0.0% | 0.0% | 0.0% | 0.0% | 0.0% | 0.0% |
| 18 to 44 years | Reconstruction of congenital hand polydactyly                                               | 2 | 0.0% | 0.0 | 0.0% | 0.0% | 0.0% | 0.0% | 0.0% | 0.0% |
| 18 to 44 years | Release of extensive scar tissue without detaching extraocular muscle (separate procedure)  | 2 | 0.0% | 0.0 | 0.0% | 0.0% | 0.0% | 0.0% | 0.0% | 0.0% |
| 18 to 44 years | Removal of blood clot, anterior segment of eye                                              | 2 | 0.0% | 0.0 | 0.0% | 0.0% | 0.0% | 0.0% | 0.0% | 0.0% |
| 18 to 44 years | Replantation, upper extremity                                                               | 2 | 0.0% | 0.0 | 0.0% | 0.0% | 0.0% | 0.0% | 0.0% | 0.0% |
| 18 to 44 years | Severing adhesions of anterior segment of eye, laser                                        | 2 | 0.0% | 0.0 | 0.0% | 0.0% | 0.0% | 0.0% | 0.0% | 0.0% |
| 18 to 44 years | Urethrectomy, total, including cystostomy                                                   | 2 | 0.0% | 0.0 | 0.0% | 0.0% | 0.0% | 0.0% | 0.0% | 0.0% |
| 18 to 44 years | Vermilionectomy, with mucosal advancement                                                   | 2 | 0.0% | 0.0 | 0.0% | 0.0% | 0.0% | 0.0% | 0.0% | 0.0% |
| 18 to 44 years | Atrial septectomy or septostomy                                                             | 1 | 0.0% | 0.0 | 0.0% | 0.0% | 0.0% | 0.0% | 0.0% | 0.0% |
| 18 to 44 years | Closure of major bronchial fistula                                                          | 1 | 0.0% | 0.0 | 0.0% | 0.0% | 0.0% | 0.0% | 0.0% | 0.0% |
| 18 to 44 years | Closure of nephrocutaneous or pyelocutaneous fistula                                        | 1 | 0.0% | 0.0 | 0.0% | 0.0% | 0.0% | 0.0% | 0.0% | 0.0% |
| 18 to 44 years | Complex repair of eyelids, nose, ears, and/or lips                                          | 1 | 0.0% | 0.0 | 0.0% | 0.0% | 0.0% | 0.0% | 0.0% | 0.0% |
| 18 to 44 years | Coracoacromial ligament release                                                             | 1 | 0.0% | 0.0 | 0.0% | 0.0% | 0.0% | 0.0% | 0.0% | 0.0% |
| 18 to 44 years | Corneal wedge resection for correction of surgically induced astigmatism                    | 1 | 0.0% | 0.0 | 0.0% | 0.0% | 0.0% | 0.0% | 0.0% | 0.0% |
| 18 to 44 years | Costotransversectomy                                                                        | 1 | 0.0% | 0.0 | 0.0% | 0.0% | 0.0% | 0.0% | 0.0% | 0.0% |
| 18 to 44 years | Cricotracheal resection                                                                     | 1 | 0.0% | 0.0 | 0.0% | 0.0% | 0.0% | 0.0% | 0.0% | 0.0% |
| 18 to 44 years | Diaphragmatic hernia repair (neonatal)                                                      | 1 | 0.0% | 0.0 | 0.0% | 0.0% | 0.0% | 0.0% | 0.0% | 0.0% |
| 18 to 44 years | Discission of vitreous strands (without removal), pars plana approach                       | 1 | 0.0% | 0.0 | 0.0% | 0.0% | 0.0% | 0.0% | 0.0% | 0.0% |

|                |                                                                                                                      |   |      |     |      |      |      |      |      |      |
|----------------|----------------------------------------------------------------------------------------------------------------------|---|------|-----|------|------|------|------|------|------|
| 18 to 44 years | Donor procedure, Harvesting conjunctival allograft, living donor                                                     | 1 | 0.0% | 0.0 | 0.0% | 0.0% | 0.0% | 0.0% | 0.0% | 0.0% |
| 18 to 44 years | Epikeratoplasty                                                                                                      | 1 | 0.0% | 0.0 | 0.0% | 0.0% | 0.0% | 0.0% | 0.0% | 0.0% |
| 18 to 44 years | Esophagomyotomy                                                                                                      | 1 | 0.0% | 0.0 | 0.0% | 0.0% | 0.0% | 0.0% | 0.0% | 0.0% |
| 18 to 44 years | Excision of coarctation of aorta                                                                                     | 1 | 0.0% | 0.0 | 0.0% | 0.0% | 0.0% | 0.0% | 0.0% | 0.0% |
| 18 to 44 years | Excision of external ear                                                                                             | 1 | 0.0% | 0.0 | 0.0% | 0.0% | 0.0% | 0.0% | 0.0% | 0.0% |
| 18 to 44 years | Excision of lesion, sclera                                                                                           | 1 | 0.0% | 0.0 | 0.0% | 0.0% | 0.0% | 0.0% | 0.0% | 0.0% |
| 18 to 44 years | Exploration of orbit (transcranial approach)                                                                         | 1 | 0.0% | 0.0 | 0.0% | 0.0% | 0.0% | 0.0% | 0.0% | 0.0% |
| 18 to 44 years | Facial nerve reconstruction or repair                                                                                | 1 | 0.0% | 0.0 | 0.0% | 0.0% | 0.0% | 0.0% | 0.0% | 0.0% |
| 18 to 44 years | Fertility procedures                                                                                                 | 1 | 0.0% | 0.0 | 0.0% | 0.0% | 0.0% | 0.0% | 0.0% | 0.0% |
| 18 to 44 years | Fimbrioplasty                                                                                                        | 1 | 0.0% | 0.0 | 0.0% | 0.0% | 0.0% | 0.0% | 0.0% | 0.0% |
| 18 to 44 years | Gender affirming procedure, vaginoplasty                                                                             | 1 | 0.0% | 0.0 | 0.0% | 0.0% | 0.0% | 0.0% | 0.0% | 0.0% |
| 18 to 44 years | Implantation of chemotherapy device                                                                                  | 1 | 0.0% | 0.0 | 0.0% | 0.0% | 0.0% | 0.0% | 0.0% | 0.0% |
| 18 to 44 years | Incision of neck or thorax                                                                                           | 1 | 0.0% | 0.0 | 0.0% | 0.0% | 0.0% | 0.0% | 0.0% | 0.0% |
| 18 to 44 years | Insertion of subcutaneous reservoir, pump or continuous infusion system for connection to ventricular catheter (CNS) | 1 | 0.0% | 0.0 | 0.0% | 0.0% | 0.0% | 0.0% | 0.0% | 0.0% |
| 18 to 44 years | Iridotomy by stab incision                                                                                           | 1 | 0.0% | 0.0 | 0.0% | 0.0% | 0.0% | 0.0% | 0.0% | 0.0% |
| 18 to 44 years | Marsupialization of cyst or abscess of liver                                                                         | 1 | 0.0% | 0.0 | 0.0% | 0.0% | 0.0% | 0.0% | 0.0% | 0.0% |
| 18 to 44 years | Mastoid obliteration                                                                                                 | 1 | 0.0% | 0.0 | 0.0% | 0.0% | 0.0% | 0.0% | 0.0% | 0.0% |
| 18 to 44 years | Outflow tract augmentation (gusset), with or without commissurotomy or infundibular resection                        | 1 | 0.0% | 0.0 | 0.0% | 0.0% | 0.0% | 0.0% | 0.0% | 0.0% |
| 18 to 44 years | Ptosis correction                                                                                                    | 1 | 0.0% | 0.0 | 0.0% | 0.0% | 0.0% | 0.0% | 0.0% | 0.0% |
| 18 to 44 years | Pyelotomy                                                                                                            | 1 | 0.0% | 0.0 | 0.0% | 0.0% | 0.0% | 0.0% | 0.0% | 0.0% |
| 18 to 44 years | Removal of prosthesis, knee                                                                                          | 1 | 0.0% | 0.0 | 0.0% | 0.0% | 0.0% | 0.0% | 0.0% | 0.0% |
| 18 to 44 years | Removal of total disc arthroplasty (artificial disc), anterior approach, single interspace; cervical                 | 1 | 0.0% | 0.0 | 0.0% | 0.0% | 0.0% | 0.0% | 0.0% | 0.0% |
| 18 to 44 years | Removal of vitreous, anterior approach                                                                               | 1 | 0.0% | 0.0 | 0.0% | 0.0% | 0.0% | 0.0% | 0.0% | 0.0% |
| 18 to 44 years | Renal exploration                                                                                                    | 1 | 0.0% | 0.0 | 0.0% | 0.0% | 0.0% | 0.0% | 0.0% | 0.0% |
| 18 to 44 years | Repair of meningocele or myelomeningocele                                                                            | 1 | 0.0% | 0.0 | 0.0% | 0.0% | 0.0% | 0.0% | 0.0% | 0.0% |
| 18 to 44 years | Repair of nasolabial fistula                                                                                         | 1 | 0.0% | 0.0 | 0.0% | 0.0% | 0.0% | 0.0% | 0.0% | 0.0% |
| 18 to 44 years | Repair of wound, extraocular muscle, tendon and/or Tenon's capsule                                                   | 1 | 0.0% | 0.0 | 0.0% | 0.0% | 0.0% | 0.0% | 0.0% | 0.0% |
| 18 to 44 years | Revision of lower extremity arterial bypass                                                                          | 1 | 0.0% | 0.0 | 0.0% | 0.0% | 0.0% | 0.0% | 0.0% | 0.0% |
| 18 to 44 years | Rhinectomy                                                                                                           | 1 | 0.0% | 0.0 | 0.0% | 0.0% | 0.0% | 0.0% | 0.0% | 0.0% |
| 18 to 44 years | Scleral reinforcement                                                                                                | 1 | 0.0% | 0.0 | 0.0% | 0.0% | 0.0% | 0.0% | 0.0% | 0.0% |
| 18 to 44 years | Suture of tongue to lip for micrognathia                                                                             | 1 | 0.0% | 0.0 | 0.0% | 0.0% | 0.0% | 0.0% | 0.0% | 0.0% |
| 18 to 44 years | Tendon graft harvest                                                                                                 | 1 | 0.0% | 0.0 | 0.0% | 0.0% | 0.0% | 0.0% | 0.0% | 0.0% |

|                |                                                                       |       |       |       |       |      |      |      |       |      |
|----------------|-----------------------------------------------------------------------|-------|-------|-------|-------|------|------|------|-------|------|
| 18 to 44 years | Thoracoplasty, Schede type or extrapleural                            | 1     | 0.0%  | 0.0   | 0.0%  | 0.0% | 0.0% | 0.0% | 0.0%  | 0.0% |
| 18 to 44 years | Thoracotomy, with open intrapleural pneumonolysis                     | 1     | 0.0%  | 0.0   | 0.0%  | 0.0% | 0.0% | 0.0% | 0.0%  | 0.0% |
| 18 to 44 years | Transcatheter intracardiac shunt creation                             | 1     | 0.0%  | 0.0   | 0.0%  | 0.0% | 0.0% | 0.0% | 0.0%  | 0.0% |
| 18 to 44 years | Transfer of iliopsoas to femur                                        | 1     | 0.0%  | 0.0   | 0.0%  | 0.0% | 0.0% | 0.0% | 0.0%  | 0.0% |
| 18 to 44 years | Transfer of tendon or muscle, hamstrings to femur                     | 1     | 0.0%  | 0.0   | 0.0%  | 0.0% | 0.0% | 0.0% | 0.0%  | 0.0% |
| 18 to 44 years | Ureteroileal conduit (ileal bladder), including intestine anastomosis | 1     | 0.0%  | 0.0   | 0.0%  | 0.0% | 0.0% | 0.0% | 0.0%  | 0.0% |
| 18 to 44 years | Ureterolithotomy - open                                               | 1     | 0.0%  | 0.0   | 0.0%  | 0.0% | 0.0% | 0.0% | 0.0%  | 0.0% |
| 18 to 44 years | Venous valve transposition, any vein donor                            | 1     | 0.0%  | 0.0   | 0.0%  | 0.0% | 0.0% | 0.0% | 0.0%  | 0.0% |
| 45 to 64 years | Arthroscopy of knee                                                   | 29303 | 57.4% | 133.5 | 7.5%  | 2.6% | 6.7% | 6.5% | 4.0%  | 4.8% |
| 45 to 64 years | Cholecystectomy - laparoscopic                                        | 18639 | 73.4% | 120.3 | 4.6%  | 3.6% | 5.5% | 3.7% | 1.3%  | 4.2% |
| 45 to 64 years | Arthroplasty of knee                                                  | 23116 | 58.6% | 254.6 | 35.7% | 3.8% | 5.4% | 9.7% | 20.7% | 5.6% |
| 45 to 64 years | Hysterectomy - laparoscopic or vaginal                                | 17610 | 66.1% | 117.4 | 5.1%  | 3.1% | 4.7% | 3.4% | 1.4%  | 3.5% |
| 45 to 64 years | Arthroscopy of shoulder                                               | 19511 | 57.9% | 194.6 | 17.0% | 3.4% | 4.5% | 6.3% | 6.3%  | 4.3% |
| 45 to 64 years | Nerve decompression                                                   | 15192 | 55.5% | 102.9 | 7.0%  | 3.1% | 3.4% | 2.6% | 2.0%  | 3.0% |
| 45 to 64 years | Laminectomy/corpectomy                                                | 12979 | 63.1% | 236.5 | 24.0% | 8.4% | 3.3% | 5.1% | 6.6%  | 6.9% |
| 45 to 64 years | Arthroplasty of hip                                                   | 13217 | 58.3% | 222.6 | 21.1% | 3.3% | 3.1% | 4.9% | 6.0%  | 2.7% |
| 45 to 64 years | Hernia repair, abdominal - open                                       | 8258  | 72.5% | 135.7 | 7.4%  | 3.4% | 2.4% | 1.9% | 1.1%  | 1.8% |
| 45 to 64 years | Hernia repair, inguinal/femoral - laparoscopic                        | 7210  | 75.4% | 122.1 | 4.2%  | 1.9% | 2.2% | 1.5% | 0.5%  | 0.9% |
| 45 to 64 years | Arthrodesis of spine                                                  | 8656  | 61.4% | 240.9 | 26.3% | 8.8% | 2.1% | 3.4% | 4.8%  | 4.8% |
| 45 to 64 years | Hernia repair, abdominal - laparoscopic                               | 6266  | 76.9% | 139.9 | 9.0%  | 4.0% | 1.9% | 1.4% | 0.9%  | 1.6% |
| 45 to 64 years | Biopsy or excision of lymph node(s)                                   | 7479  | 61.5% | 81.9  | 7.1%  | 5.1% | 1.8% | 1.0% | 1.1%  | 2.4% |
| 45 to 64 years | Rhinoplasty                                                           | 7949  | 55.3% | 107.7 | 3.9%  | 3.4% | 1.8% | 1.4% | 0.5%  | 1.7% |
| 45 to 64 years | Open treatment of fracture, upper extremity                           | 6400  | 59.8% | 157.7 | 13.8% | 3.4% | 1.5% | 1.7% | 1.8%  | 1.4% |
| 45 to 64 years | Open treatment of fracture, lower extremity                           | 6519  | 58.5% | 193.3 | 18.9% | 3.1% | 1.5% | 2.1% | 2.5%  | 1.3% |
| 45 to 64 years | Trigger finger release                                                | 8356  | 44.0% | 61.3  | 3.4%  | 2.2% | 1.5% | 0.8% | 0.5%  | 1.1% |
| 45 to 64 years | Biceps tenodesis or reconstruction                                    | 6050  | 60.7% | 209.1 | 15.0% | 3.2% | 1.5% | 2.1% | 1.8%  | 1.2% |
| 45 to 64 years | Hernia repair, inguinal/femoral - open                                | 4745  | 75.9% | 148.3 | 6.8%  | 2.3% | 1.4% | 1.2% | 0.5%  | 0.7% |
| 45 to 64 years | Appendectomy - laparoscopic                                           | 5231  | 68.2% | 100.7 | 3.8%  | 2.4% | 1.4% | 0.9% | 0.3%  | 0.8% |
| 45 to 64 years | Correction of hallux rigidus                                          | 6486  | 48.4% | 119.1 | 8.1%  | 3.0% | 1.3% | 1.3% | 1.1%  | 1.2% |
| 45 to 64 years | Lumpectomy or mastectomy                                              | 4676  | 57.1% | 97.8  | 7.7%  | 4.8% | 1.1% | 0.8% | 0.7%  | 1.4% |
| 45 to 64 years | Arthrodesis of lower extremity                                        | 4278  | 56.1% | 178.1 | 18.8% | 4.6% | 1.0% | 1.3% | 1.7%  | 1.2% |
| 45 to 64 years | Thyroidectomy, with or without lymphadenectomy                        | 3822  | 59.6% | 84.6  | 3.2%  | 2.8% | 0.9% | 0.5% | 0.2%  | 0.7% |
| 45 to 64 years | Gastric bypass                                                        | 4555  | 47.0% | 97.8  | 4.5%  | 3.2% | 0.9% | 0.7% | 0.3%  | 0.9% |

|                |                                                                                        |       |       |       |       |      |      |      |      |      |
|----------------|----------------------------------------------------------------------------------------|-------|-------|-------|-------|------|------|------|------|------|
| 45 to 64 years | Removal of implant; deep (eg, buried wire, pin, screw, metal band, nail, rod or plate) | 4228  | 50.4% | 141.2 | 10.2% | 3.9% | 0.9% | 1.0% | 0.9% | 1.0% |
| 45 to 64 years | Arthroplasty of forearm or hand                                                        | 3055  | 67.2% | 162.0 | 14.8% | 4.5% | 0.8% | 0.8% | 1.0% | 0.9% |
| 45 to 64 years | Excision of soft tissue lesion                                                         | 4560  | 44.7% | 68.3  | 3.3%  | 2.0% | 0.8% | 0.5% | 0.3% | 0.6% |
| 45 to 64 years | Colectomy and/or proctectomy - laparoscopic                                            | 3043  | 65.8% | 117.2 | 10.4% | 3.3% | 0.8% | 0.6% | 0.5% | 0.6% |
| 45 to 64 years | Excision of breast lesion                                                              | 3925  | 50.4% | 58.6  | 2.8%  | 3.2% | 0.8% | 0.4% | 0.2% | 0.8% |
| 45 to 64 years | Carpal tunnel release, endoscopic                                                      | 3822  | 51.6% | 72.1  | 4.1%  | 2.0% | 0.8% | 0.5% | 0.3% | 0.5% |
| 45 to 64 years | Prostatectomy - laparoscopic                                                           | 2632  | 66.3% | 88.5  | 4.9%  | 2.2% | 0.7% | 0.4% | 0.2% | 0.4% |
| 45 to 64 years | Sling operation for stress incontinence                                                | 2737  | 60.6% | 80.6  | 4.7%  | 4.4% | 0.7% | 0.4% | 0.2% | 0.8% |
| 45 to 64 years | Adjacent tissue transfer or rearrangement                                              | 8984  | 18.2% | 23.4  | 1.1%  | 0.8% | 0.7% | 0.3% | 0.2% | 0.5% |
| 45 to 64 years | Hysterectomy - open abdominal                                                          | 2474  | 61.0% | 116.6 | 7.7%  | 2.3% | 0.6% | 0.5% | 0.3% | 0.4% |
| 45 to 64 years | Laparoscopic repair of paraesophageal hernia                                           | 2491  | 59.4% | 119.7 | 6.9%  | 4.8% | 0.6% | 0.5% | 0.3% | 0.8% |
| 45 to 64 years | Mohs micrographic technique                                                            | 23547 | 6.0%  | 7.1   | 0.5%  | 0.5% | 0.6% | 0.3% | 0.2% | 0.7% |
| 45 to 64 years | Fasciectomy or fasciotomy                                                              | 2277  | 54.2% | 106.4 | 7.2%  | 2.4% | 0.5% | 0.4% | 0.3% | 0.4% |
| 45 to 64 years | CABG                                                                                   | 1805  | 68.3% | 175.3 | 15.2% | 3.8% | 0.5% | 0.5% | 0.5% | 0.4% |
| 45 to 64 years | Repair of ruptured Achilles tendon                                                     | 2139  | 57.5% | 142.4 | 12.2% | 3.5% | 0.5% | 0.5% | 0.5% | 0.5% |
| 45 to 64 years | Arthroplasty of shoulder                                                               | 2090  | 58.8% | 263.5 | 25.9% | 4.3% | 0.5% | 0.9% | 1.2% | 0.6% |
| 45 to 64 years | Repair of ruptured musculotendinous cuff - open                                        | 1848  | 62.6% | 230.8 | 24.9% | 5.6% | 0.5% | 0.7% | 1.0% | 0.7% |
| 45 to 64 years | Tenotomy, upper extremity                                                              | 1946  | 57.8% | 149.6 | 9.8%  | 3.4% | 0.5% | 0.5% | 0.3% | 0.4% |
| 45 to 64 years | Nephrectomy - laparoscopic                                                             | 1558  | 68.7% | 113.9 | 9.4%  | 2.6% | 0.4% | 0.3% | 0.2% | 0.3% |
| 45 to 64 years | Implantable cardiac device procedures                                                  | 3914  | 26.4% | 41.7  | 3.3%  | 1.8% | 0.4% | 0.3% | 0.2% | 0.4% |
| 45 to 64 years | Osteotomy of lower extremity                                                           | 1866  | 52.4% | 163.6 | 14.0% | 3.1% | 0.4% | 0.5% | 0.6% | 0.4% |
| 45 to 64 years | Arteriovenous fistula creation or reconstruction                                       | 1587  | 58.4% | 110.6 | 7.7%  | 2.1% | 0.4% | 0.3% | 0.2% | 0.2% |
| 45 to 64 years | Tendon repair, lower extremity                                                         | 1569  | 56.9% | 145.1 | 14.0% | 3.0% | 0.4% | 0.4% | 0.4% | 0.3% |
| 45 to 64 years | Graft of fat or other tissue                                                           | 1793  | 49.5% | 89.6  | 4.4%  | 4.3% | 0.4% | 0.3% | 0.1% | 0.5% |
| 45 to 64 years | Excision of ganglion, wrist                                                            | 1518  | 58.4% | 99.9  | 5.8%  | 3.8% | 0.4% | 0.3% | 0.2% | 0.4% |
| 45 to 64 years | Breast implant                                                                         | 1958  | 45.1% | 82.1  | 4.5%  | 5.5% | 0.4% | 0.3% | 0.2% | 0.7% |
| 45 to 64 years | Skin graft                                                                             | 3078  | 28.0% | 55.6  | 4.5%  | 1.6% | 0.3% | 0.3% | 0.3% | 0.3% |
| 45 to 64 years | Mammoplasty, augmentation                                                              | 2038  | 42.3% | 82.3  | 5.0%  | 2.6% | 0.3% | 0.3% | 0.2% | 0.3% |
| 45 to 64 years | Parathyroidectomy                                                                      | 1641  | 52.3% | 68.8  | 2.7%  | 1.8% | 0.3% | 0.2% | 0.1% | 0.2% |
| 45 to 64 years | Colpopexy - laparoscopic                                                               | 1339  | 62.7% | 108.9 | 5.2%  | 2.6% | 0.3% | 0.2% | 0.1% | 0.2% |
| 45 to 64 years | Amputation of lower extremity                                                          | 1755  | 47.2% | 139.1 | 12.1% | 1.9% | 0.3% | 0.4% | 0.5% | 0.2% |
| 45 to 64 years | Ostectomy of foot and/or toes                                                          | 1590  | 51.3% | 138.1 | 12.7% | 3.7% | 0.3% | 0.4% | 0.4% | 0.4% |
| 45 to 64 years | Surgical treatment of anal fistula                                                     | 1191  | 67.8% | 138.1 | 8.1%  | 4.2% | 0.3% | 0.3% | 0.2% | 0.3% |

|                |                                                                      |      |       |       |       |      |      |      |      |      |
|----------------|----------------------------------------------------------------------|------|-------|-------|-------|------|------|------|------|------|
| 45 to 64 years | Excision of hydrocele                                                | 1100 | 72.6% | 103.2 | 7.0%  | 2.0% | 0.3% | 0.2% | 0.1% | 0.1% |
| 45 to 64 years | Excision of lesion of tendon sheath or joint capsule, hand or finger | 1940 | 39.8% | 61.3  | 2.2%  | 1.9% | 0.3% | 0.2% | 0.1% | 0.2% |
| 45 to 64 years | Colectomy and/or proctectomy - open                                  | 1241 | 58.6% | 120.1 | 14.3% | 2.7% | 0.3% | 0.2% | 0.3% | 0.2% |
| 45 to 64 years | Inferior turbinate resection or excision                             | 2134 | 32.8% | 57.8  | 2.5%  | 2.2% | 0.3% | 0.2% | 0.1% | 0.3% |
| 45 to 64 years | Nerve repair                                                         | 1320 | 52.3% | 103.6 | 9.2%  | 3.9% | 0.3% | 0.2% | 0.2% | 0.3% |
| 45 to 64 years | Incision of tendon sheath of wrist                                   | 1329 | 51.2% | 77.6  | 4.9%  | 3.6% | 0.3% | 0.2% | 0.1% | 0.3% |
| 45 to 64 years | Excision of salivary tumor or salivary gland                         | 1007 | 65.7% | 114.7 | 8.2%  | 3.8% | 0.3% | 0.2% | 0.1% | 0.2% |
| 45 to 64 years | Tonsillectomy and/or adenoidectomy                                   | 1030 | 64.1% | 201.5 | 20.4% | 3.9% | 0.3% | 0.3% | 0.3% | 0.3% |
| 45 to 64 years | Laparoscopic abdominal procedure                                     | 1010 | 64.5% | 112.6 | 8.1%  | 3.0% | 0.3% | 0.2% | 0.1% | 0.2% |
| 45 to 64 years | Craniectomy or craniotomy                                            | 1180 | 54.8% | 160.9 | 10.8% | 6.3% | 0.3% | 0.3% | 0.2% | 0.5% |
| 45 to 64 years | Tympanoplasty                                                        | 1065 | 60.8% | 104.2 | 4.8%  | 3.6% | 0.3% | 0.2% | 0.1% | 0.2% |
| 45 to 64 years | Transurethral resection of prostate                                  | 1517 | 39.7% | 57.9  | 3.2%  | 1.5% | 0.2% | 0.1% | 0.1% | 0.1% |
| 45 to 64 years | Thoracoscopy, with partial or complete lung removal                  | 843  | 70.2% | 180.2 | 20.6% | 7.5% | 0.2% | 0.3% | 0.3% | 0.4% |
| 45 to 64 years | Arthroscopy of hip                                                   | 1107 | 51.8% | 175.4 | 10.9% | 4.4% | 0.2% | 0.3% | 0.2% | 0.3% |
| 45 to 64 years | Tendon repair, upper extremity                                       | 905  | 60.8% | 157.0 | 10.3% | 3.0% | 0.2% | 0.2% | 0.2% | 0.2% |
| 45 to 64 years | Excision of facial bone or tumor/cyst in facial bone                 | 950  | 57.6% | 84.8  | 7.3%  | 3.3% | 0.2% | 0.1% | 0.1% | 0.2% |
| 45 to 64 years | Bone resection                                                       | 1153 | 46.9% | 105.0 | 8.0%  | 2.6% | 0.2% | 0.2% | 0.2% | 0.2% |
| 45 to 64 years | Debridement of skin, muscle, or bone                                 | 2510 | 21.4% | 68.4  | 6.5%  | 1.9% | 0.2% | 0.3% | 0.4% | 0.3% |
| 45 to 64 years | Arthrodesis of upper extremity                                       | 809  | 65.3% | 199.7 | 17.9% | 5.2% | 0.2% | 0.3% | 0.3% | 0.3% |
| 45 to 64 years | Lipectomy, with or without excessive skin removal                    | 935  | 55.7% | 117.0 | 13.9% | 6.8% | 0.2% | 0.2% | 0.3% | 0.4% |
| 45 to 64 years | Colporrhaphy                                                         | 870  | 58.7% | 98.4  | 6.1%  | 6.0% | 0.2% | 0.1% | 0.1% | 0.3% |
| 45 to 64 years | Arthroscopy of ankle or foot                                         | 915  | 54.6% | 150.5 | 10.2% | 4.0% | 0.2% | 0.2% | 0.2% | 0.2% |
| 45 to 64 years | Excision of bone cyst or benign tumor with or without bone grafting  | 1044 | 47.6% | 124.5 | 8.0%  | 2.4% | 0.2% | 0.2% | 0.2% | 0.2% |
| 45 to 64 years | Suture of quadriceps or hamstring muscle rupture                     | 780  | 62.4% | 180.8 | 15.4% | 3.7% | 0.2% | 0.2% | 0.3% | 0.2% |
| 45 to 64 years | Laryngoscopy, with tumor excision, with or without reconstruction    | 1295 | 35.7% | 56.2  | 4.6%  | 3.2% | 0.2% | 0.1% | 0.1% | 0.3% |
| 45 to 64 years | Laparoscopic esophagus fundoplasty                                   | 608  | 71.5% | 142.4 | 8.7%  | 5.1% | 0.2% | 0.1% | 0.1% | 0.2% |
| 45 to 64 years | Excision of neuroma, neurofibroma, or neurolemmoma                   | 909  | 46.8% | 97.6  | 6.3%  | 2.5% | 0.2% | 0.1% | 0.1% | 0.1% |
| 45 to 64 years | Lymphadenectomy                                                      | 674  | 62.6% | 122.5 | 11.6% | 5.6% | 0.2% | 0.1% | 0.1% | 0.2% |
| 45 to 64 years | Thromboendarterectomy                                                | 771  | 54.3% | 105.1 | 9.9%  | 5.1% | 0.2% | 0.1% | 0.1% | 0.2% |
| 45 to 64 years | Open treatment of clavicle fracture                                  | 712  | 58.1% | 176.5 | 11.0% | 2.7% | 0.2% | 0.2% | 0.1% | 0.1% |
| 45 to 64 years | Tendon transfer, upper extremity                                     | 602  | 66.9% | 279.6 | 24.1% | 6.5% | 0.2% | 0.3% | 0.3% | 0.2% |
| 45 to 64 years | Arthroplasty of spine                                                | 655  | 60.0% | 250.7 | 13.6% | 7.0% | 0.2% | 0.3% | 0.2% | 0.3% |
| 45 to 64 years | Intestinal procedure, resection and closure of enterostomy           | 641  | 60.1% | 140.4 | 13.9% | 4.2% | 0.2% | 0.1% | 0.2% | 0.2% |

|                |                                                                                                         |       |       |       |       |       |      |      |      |      |
|----------------|---------------------------------------------------------------------------------------------------------|-------|-------|-------|-------|-------|------|------|------|------|
| 45 to 64 years | Tenolysis, upper extremity                                                                              | 626   | 57.8% | 129.4 | 7.5%  | 3.5%  | 0.1% | 0.1% | 0.1% | 0.1% |
| 45 to 64 years | Intravitreal injection of a pharmacologic agent                                                         | 53857 | 0.7%  | 4.2   | 0.2%  | 0.1%  | 0.1% | 0.4% | 0.4% | 0.2% |
| 45 to 64 years | Open treatment of fracture, hip or pelvis                                                               | 626   | 56.9% | 239.3 | 25.7% | 5.3%  | 0.1% | 0.2% | 0.3% | 0.2% |
| 45 to 64 years | Vulvectomy                                                                                              | 607   | 58.6% | 86.4  | 10.5% | 4.8%  | 0.1% | 0.1% | 0.1% | 0.2% |
| 45 to 64 years | Repair or reconstruction of collateral ligament, hand and/or fingers                                    | 519   | 67.6% | 147.0 | 7.9%  | 3.7%  | 0.1% | 0.1% | 0.1% | 0.1% |
| 45 to 64 years | Gastrocnemius recession                                                                                 | 627   | 55.5% | 176.1 | 18.5% | 3.3%  | 0.1% | 0.2% | 0.2% | 0.1% |
| 45 to 64 years | Excision of rectal tumor, transanal, transsacral, transcoccygeal                                        | 539   | 63.5% | 98.0  | 6.7%  | 5.0%  | 0.1% | 0.1% | 0.1% | 0.2% |
| 45 to 64 years | Endovascular revascularization, lower extremity                                                         | 3030  | 11.2% | 32.2  | 2.9%  | 1.1%  | 0.1% | 0.2% | 0.2% | 0.2% |
| 45 to 64 years | Repair of blepharoptosis                                                                                | 1749  | 19.2% | 20.7  | 1.1%  | 1.5%  | 0.1% | 0.1% | 0.0% | 0.2% |
| 45 to 64 years | Penile prostheses                                                                                       | 463   | 71.3% | 116.4 | 15.8% | 3.7%  | 0.1% | 0.1% | 0.1% | 0.1% |
| 45 to 64 years | Laparoscopic liver procedure                                                                            | 597   | 54.8% | 88.7  | 8.0%  | 2.3%  | 0.1% | 0.1% | 0.1% | 0.1% |
| 45 to 64 years | Claviculectomy                                                                                          | 510   | 62.2% | 312.6 | 19.4% | 4.7%  | 0.1% | 0.3% | 0.2% | 0.2% |
| 45 to 64 years | Aortic valve repair/replacement - open                                                                  | 471   | 66.9% | 155.7 | 12.7% | 4.5%  | 0.1% | 0.1% | 0.1% | 0.1% |
| 45 to 64 years | Placement, removal, revision and/or replacement of adjustable gastric restrictive device - laparoscopic | 575   | 54.6% | 102.1 | 4.5%  | 3.1%  | 0.1% | 0.1% | 0.0% | 0.1% |
| 45 to 64 years | Percutaneous coronary procedures                                                                        | 14135 | 2.2%  | 9.0   | 0.8%  | 0.4%  | 0.1% | 0.2% | 0.2% | 0.3% |
| 45 to 64 years | Breast reconstruction                                                                                   | 592   | 52.4% | 126.7 | 10.3% | 8.4%  | 0.1% | 0.1% | 0.1% | 0.3% |
| 45 to 64 years | Replacement of tissue expander with permanent prosthesis                                                | 643   | 48.1% | 117.1 | 4.8%  | 6.5%  | 0.1% | 0.1% | 0.1% | 0.3% |
| 45 to 64 years | Radical resection of tumor, soft tissue                                                                 | 507   | 60.7% | 123.5 | 8.5%  | 2.8%  | 0.1% | 0.1% | 0.1% | 0.1% |
| 45 to 64 years | Incision for implantation of neurostimulator electrode array                                            | 516   | 57.2% | 89.6  | 7.6%  | 8.1%  | 0.1% | 0.1% | 0.1% | 0.3% |
| 45 to 64 years | Fissulectomy                                                                                            | 419   | 70.4% | 146.5 | 9.1%  | 11.5% | 0.1% | 0.1% | 0.1% | 0.3% |
| 45 to 64 years | Repair of retinal detachment                                                                            | 3480  | 8.4%  | 10.6  | 0.4%  | 0.3%  | 0.1% | 0.1% | 0.0% | 0.1% |
| 45 to 64 years | Arthroscopy of wrist                                                                                    | 445   | 64.9% | 163.6 | 7.4%  | 4.3%  | 0.1% | 0.1% | 0.1% | 0.1% |
| 45 to 64 years | Bone graft procedure                                                                                    | 500   | 56.6% | 195.8 | 21.8% | 4.0%  | 0.1% | 0.2% | 0.2% | 0.1% |
| 45 to 64 years | Open treatment of facial fractures                                                                      | 461   | 60.7% | 166.8 | 11.9% | 4.1%  | 0.1% | 0.1% | 0.1% | 0.1% |
| 45 to 64 years | Radical excision of bursa, synovia of wrist, or forearm                                                 | 476   | 58.0% | 74.7  | 7.8%  | 3.6%  | 0.1% | 0.1% | 0.1% | 0.1% |
| 45 to 64 years | Amputation of upper extremity                                                                           | 466   | 59.0% | 143.1 | 14.8% | 2.8%  | 0.1% | 0.1% | 0.1% | 0.1% |
| 45 to 64 years | Excision of lesion, tendon, tendon sheath, or capsule; foot                                             | 650   | 41.8% | 74.5  | 3.1%  | 2.0%  | 0.1% | 0.1% | 0.0% | 0.1% |
| 45 to 64 years | Excision of spermatocele, with or without epididymectomy                                                | 376   | 72.1% | 106.9 | 4.8%  | 1.6%  | 0.1% | 0.1% | 0.0% | 0.0% |
| 45 to 64 years | Graft of bone or cartilage to face                                                                      | 461   | 53.6% | 83.6  | 4.8%  | 3.7%  | 0.1% | 0.1% | 0.0% | 0.1% |
| 45 to 64 years | Enterolysis - laparoscopic                                                                              | 442   | 55.0% | 120.7 | 10.9% | 4.1%  | 0.1% | 0.1% | 0.1% | 0.1% |
| 45 to 64 years | Hand tendon repair                                                                                      | 376   | 64.6% | 135.3 | 9.6%  | 2.9%  | 0.1% | 0.1% | 0.1% | 0.1% |
| 45 to 64 years | Revision of reconstructed breast                                                                        | 533   | 44.8% | 78.2  | 5.3%  | 4.3%  | 0.1% | 0.1% | 0.1% | 0.1% |



|                |                                                                                                                                              |       |       |       |       |       |      |      |      |      |
|----------------|----------------------------------------------------------------------------------------------------------------------------------------------|-------|-------|-------|-------|-------|------|------|------|------|
| 45 to 64 years | Transcatheter placement of intravascular stent - percutaneous or open                                                                        | 1005  | 23.7% | 48.5  | 3.7%  | 2.6%  | 0.1% | 0.1% | 0.1% | 0.2% |
| 45 to 64 years | Cesarean section                                                                                                                             | 477   | 49.9% | 90.5  | 2.5%  | 0.6%  | 0.1% | 0.1% | 0.0% | 0.0% |
| 45 to 64 years | Interventional cardiology; Comprehensive electrophysiologic evaluation including insertion and repositioning of multiple electrode catheters | 7613  | 3.1%  | 7.3   | 0.4%  | 0.3%  | 0.1% | 0.1% | 0.0% | 0.1% |
| 45 to 64 years | Excision of olecranon bursa                                                                                                                  | 398   | 58.8% | 141.6 | 8.0%  | 4.3%  | 0.1% | 0.1% | 0.1% | 0.1% |
| 45 to 64 years | Intestinal procedure, resection and anastomosis - open                                                                                       | 409   | 56.5% | 115.7 | 13.7% | 3.9%  | 0.1% | 0.1% | 0.1% | 0.1% |
| 45 to 64 years | Laparoscopic fulguration or excision of lesions of the ovary, pelvic viscera, or peritoneal surface by any method                            | 354   | 65.0% | 118.7 | 7.1%  | 5.4%  | 0.1% | 0.1% | 0.0% | 0.1% |
| 45 to 64 years | Reconstruction of nonunion or malunion, upper extremity                                                                                      | 352   | 64.5% | 218.4 | 22.2% | 5.4%  | 0.1% | 0.1% | 0.2% | 0.1% |
| 45 to 64 years | Bypass graft                                                                                                                                 | 338   | 63.6% | 163.2 | 21.9% | 3.6%  | 0.1% | 0.1% | 0.1% | 0.1% |
| 45 to 64 years | Exploration of spinal fusion                                                                                                                 | 376   | 56.4% | 253.5 | 31.1% | 10.1% | 0.1% | 0.2% | 0.3% | 0.2% |
| 45 to 64 years | Revision and/or thrombectomy of arteriovenous fistula                                                                                        | 418   | 50.2% | 107.1 | 6.9%  | 2.4%  | 0.1% | 0.1% | 0.1% | 0.1% |
| 45 to 64 years | Excision or destruction - intra-abdominal tumors, cysts or endometriomas                                                                     | 327   | 63.9% | 157.0 | 15.3% | 4.9%  | 0.1% | 0.1% | 0.1% | 0.1% |
| 45 to 64 years | Incision for implantation of cranial nerve (eg, vagus nerve) neurostimulator electrode array and pulse generator                             | 339   | 61.4% | 89.1  | 5.6%  | 7.4%  | 0.1% | 0.0% | 0.0% | 0.2% |
| 45 to 64 years | Carpectomy                                                                                                                                   | 297   | 69.7% | 233.8 | 24.2% | 5.1%  | 0.1% | 0.1% | 0.1% | 0.1% |
| 45 to 64 years | Synovectomy, hand                                                                                                                            | 459   | 44.4% | 59.8  | 4.4%  | 2.0%  | 0.1% | 0.0% | 0.0% | 0.1% |
| 45 to 64 years | Tricuspid or Mitral valve repair/reconstruction - open                                                                                       | 317   | 64.4% | 171.9 | 10.1% | 1.6%  | 0.1% | 0.1% | 0.1% | 0.0% |
| 45 to 64 years | Endoscopic plantar fasciotomy                                                                                                                | 451   | 44.8% | 109.7 | 4.7%  | 2.9%  | 0.1% | 0.1% | 0.0% | 0.1% |
| 45 to 64 years | Orchiectomy - open                                                                                                                           | 294   | 68.4% | 113.4 | 7.5%  | 1.7%  | 0.1% | 0.1% | 0.0% | 0.0% |
| 45 to 64 years | Aortic reconstruction/repair                                                                                                                 | 400   | 50.0% | 131.9 | 11.8% | 2.5%  | 0.1% | 0.1% | 0.1% | 0.1% |
| 45 to 64 years | Sphincteroplasty, anal                                                                                                                       | 292   | 67.8% | 142.1 | 12.7% | 6.5%  | 0.1% | 0.1% | 0.1% | 0.1% |
| 45 to 64 years | Destruction of lesion(s), anus                                                                                                               | 393   | 49.9% | 99.6  | 5.6%  | 3.6%  | 0.1% | 0.1% | 0.0% | 0.1% |
| 45 to 64 years | Arthroplasty of ankle                                                                                                                        | 319   | 60.5% | 212.6 | 25.7% | 1.9%  | 0.1% | 0.1% | 0.2% | 0.0% |
| 45 to 64 years | Periprosthetic capsulotomy, breast                                                                                                           | 392   | 47.4% | 140.5 | 8.7%  | 7.4%  | 0.1% | 0.1% | 0.1% | 0.2% |
| 45 to 64 years | Cataract removal                                                                                                                             | 21632 | 0.9%  | 5.5   | 0.3%  | 0.1%  | 0.1% | 0.2% | 0.2% | 0.2% |
| 45 to 64 years | Synovectomy, foot                                                                                                                            | 357   | 51.0% | 159.9 | 13.2% | 2.8%  | 0.1% | 0.1% | 0.1% | 0.1% |
| 45 to 64 years | Secondary closure of surgical wound or dehiscence                                                                                            | 388   | 45.6% | 164.6 | 14.2% | 3.6%  | 0.1% | 0.1% | 0.1% | 0.1% |
| 45 to 64 years | Excision of pilonidal cyst or sinus                                                                                                          | 303   | 56.8% | 144.0 | 12.2% | 3.0%  | 0.1% | 0.1% | 0.1% | 0.1% |
| 45 to 64 years | Nephrectomy - open                                                                                                                           | 269   | 63.6% | 135.3 | 15.6% | 3.7%  | 0.1% | 0.1% | 0.1% | 0.1% |
| 45 to 64 years | Ligation of blood vessels                                                                                                                    | 342   | 49.7% | 67.5  | 4.4%  | 2.6%  | 0.1% | 0.0% | 0.0% | 0.1% |
| 45 to 64 years | Cochlear device implantation                                                                                                                 | 243   | 69.5% | 100.7 | 4.1%  | 5.3%  | 0.1% | 0.0% | 0.0% | 0.1% |
| 45 to 64 years | Cholecystectomy - open                                                                                                                       | 284   | 59.2% | 141.0 | 12.7% | 5.3%  | 0.1% | 0.1% | 0.1% | 0.1% |

|                |                                                                                                                                                                                                                |      |       |       |       |       |      |      |      |      |
|----------------|----------------------------------------------------------------------------------------------------------------------------------------------------------------------------------------------------------------|------|-------|-------|-------|-------|------|------|------|------|
| 45 to 64 years | Glossectomy                                                                                                                                                                                                    | 246  | 68.3% | 154.5 | 19.5% | 1.6%  | 0.1% | 0.1% | 0.1% | 0.0% |
| 45 to 64 years | Excision or curettage of bone cyst or benign tumor                                                                                                                                                             | 255  | 64.3% | 149.9 | 13.3% | 5.1%  | 0.1% | 0.1% | 0.1% | 0.1% |
| 45 to 64 years | Strabismus surgery                                                                                                                                                                                             | 707  | 23.1% | 37.2  | 2.1%  | 1.7%  | 0.1% | 0.0% | 0.0% | 0.1% |
| 45 to 64 years | Urethroplasty                                                                                                                                                                                                  | 237  | 68.8% | 136.8 | 6.8%  | 6.3%  | 0.1% | 0.1% | 0.0% | 0.1% |
| 45 to 64 years | Repair of brow ptosis                                                                                                                                                                                          | 590  | 27.5% | 33.3  | 1.5%  | 1.7%  | 0.1% | 0.0% | 0.0% | 0.1% |
| 45 to 64 years | Repair of disrupted ligament, ankle                                                                                                                                                                            | 307  | 51.8% | 195.2 | 19.5% | 6.8%  | 0.1% | 0.1% | 0.1% | 0.1% |
| 45 to 64 years | Reconstruction of nonunion or malunion, lower extremity                                                                                                                                                        | 260  | 60.8% | 301.4 | 25.0% | 4.2%  | 0.1% | 0.1% | 0.2% | 0.1% |
| 45 to 64 years | Arthrotomy of upper extremity                                                                                                                                                                                  | 320  | 49.1% | 116.7 | 9.7%  | 1.9%  | 0.1% | 0.1% | 0.1% | 0.0% |
| 45 to 64 years | Acromioplasty or acromionectomy                                                                                                                                                                                | 228  | 68.4% | 219.8 | 25.9% | 3.5%  | 0.1% | 0.1% | 0.1% | 0.1% |
| 45 to 64 years | Tenotomy, lower extremity                                                                                                                                                                                      | 992  | 15.6% | 46.7  | 2.2%  | 1.1%  | 0.1% | 0.1% | 0.1% | 0.1% |
| 45 to 64 years | Stapedectomy or stapedotomy                                                                                                                                                                                    | 293  | 52.9% | 59.0  | 1.0%  | 2.0%  | 0.1% | 0.0% | 0.0% | 0.0% |
| 45 to 64 years | Laparoscopic stomach procedure                                                                                                                                                                                 | 327  | 47.1% | 90.0  | 10.7% | 5.2%  | 0.1% | 0.0% | 0.1% | 0.1% |
| 45 to 64 years | Lung resection                                                                                                                                                                                                 | 228  | 66.7% | 195.5 | 35.5% | 7.5%  | 0.1% | 0.1% | 0.2% | 0.1% |
| 45 to 64 years | Excision of lesion of tendon sheath or capsule (eg, cyst or ganglion), leg and/or ankle                                                                                                                        | 261  | 57.9% | 151.8 | 11.5% | 4.2%  | 0.1% | 0.1% | 0.1% | 0.1% |
| 45 to 64 years | Colpopexy - open                                                                                                                                                                                               | 218  | 69.3% | 324.0 | 11.5% | 6.0%  | 0.1% | 0.1% | 0.0% | 0.1% |
| 45 to 64 years | Liver resection                                                                                                                                                                                                | 215  | 67.9% | 171.5 | 14.9% | 3.7%  | 0.1% | 0.1% | 0.1% | 0.1% |
| 45 to 64 years | Fracture of nasal inferior turbinate(s)                                                                                                                                                                        | 321  | 43.6% | 61.4  | 2.5%  | 3.4%  | 0.1% | 0.0% | 0.0% | 0.1% |
| 45 to 64 years | Arthrotomy of lower extremity                                                                                                                                                                                  | 291  | 48.1% | 138.2 | 13.1% | 4.1%  | 0.1% | 0.1% | 0.1% | 0.1% |
| 45 to 64 years | Removal of implantable defibrillator pulse generator with replacement of implantable defibrillator pulse generator                                                                                             | 602  | 23.1% | 34.3  | 2.0%  | 1.7%  | 0.1% | 0.0% | 0.0% | 0.1% |
| 45 to 64 years | Neurostimulator procedures                                                                                                                                                                                     | 269  | 51.3% | 108.5 | 12.6% | 8.9%  | 0.1% | 0.0% | 0.1% | 0.2% |
| 45 to 64 years | Arterial bypass                                                                                                                                                                                                | 216  | 63.4% | 141.8 | 18.1% | 5.1%  | 0.1% | 0.1% | 0.1% | 0.1% |
| 45 to 64 years | Resection (initial) of ovarian, tubal or primary peritoneal malignancy with bilateral salpingo-oophorectomy and omentectomy; with total abdominal hysterectomy, pelvic and limited para-aortic lymphadenectomy | 264  | 51.5% | 134.7 | 10.2% | 1.9%  | 0.1% | 0.1% | 0.0% | 0.0% |
| 45 to 64 years | Suture of infrapatellar tendon                                                                                                                                                                                 | 213  | 63.8% | 192.9 | 19.2% | 1.9%  | 0.1% | 0.1% | 0.1% | 0.0% |
| 45 to 64 years | Adrenalectomy - laparoscopic                                                                                                                                                                                   | 199  | 68.3% | 112.2 | 10.1% | 5.0%  | 0.1% | 0.0% | 0.0% | 0.1% |
| 45 to 64 years | Removal of instrumentation in spine                                                                                                                                                                            | 239  | 56.5% | 237.1 | 25.5% | 11.3% | 0.1% | 0.1% | 0.1% | 0.2% |
| 45 to 64 years | Flap reconstruction                                                                                                                                                                                            | 405  | 31.9% | 73.2  | 5.7%  | 1.2%  | 0.1% | 0.0% | 0.0% | 0.0% |
| 45 to 64 years | Reconstruction of foot                                                                                                                                                                                         | 255  | 50.6% | 131.5 | 14.5% | 3.5%  | 0.1% | 0.1% | 0.1% | 0.1% |
| 45 to 64 years | Laparoscopic enterotomy closure                                                                                                                                                                                | 185  | 68.6% | 140.6 | 12.4% | 5.4%  | 0.1% | 0.0% | 0.0% | 0.1% |
| 45 to 64 years | Laparoscopic lysis of adhesions                                                                                                                                                                                | 200  | 62.5% | 100.2 | 9.0%  | 4.0%  | 0.1% | 0.0% | 0.0% | 0.1% |
| 45 to 64 years | Vitrectomy                                                                                                                                                                                                     | 2974 | 4.1%  | 10.0  | 0.4%  | 0.3%  | 0.0% | 0.0% | 0.0% | 0.1% |

|                |                                                                                 |       |       |       |       |       |      |      |      |      |
|----------------|---------------------------------------------------------------------------------|-------|-------|-------|-------|-------|------|------|------|------|
| 45 to 64 years | Capsulorrhaphy or reconstruction, wrist                                         | 197   | 61.9% | 159.3 | 16.8% | 3.6%  | 0.0% | 0.1% | 0.1% | 0.0% |
| 45 to 64 years | Laparoscopic intestinal procedure                                               | 197   | 61.4% | 163.6 | 14.2% | 6.1%  | 0.0% | 0.1% | 0.0% | 0.1% |
| 45 to 64 years | Pancreatectomy                                                                  | 195   | 62.1% | 162.4 | 19.0% | 5.1%  | 0.0% | 0.1% | 0.1% | 0.1% |
| 45 to 64 years | Closure of enterostomy                                                          | 181   | 65.7% | 161.1 | 9.9%  | 4.4%  | 0.0% | 0.0% | 0.0% | 0.1% |
| 45 to 64 years | Removal of mammary implant                                                      | 256   | 45.7% | 81.3  | 3.5%  | 4.7%  | 0.0% | 0.0% | 0.0% | 0.1% |
| 45 to 64 years | Alveoloplasty                                                                   | 202   | 57.9% | 80.7  | 16.8% | 7.4%  | 0.0% | 0.0% | 0.1% | 0.1% |
| 45 to 64 years | CSF shunt                                                                       | 916   | 12.6% | 32.6  | 2.7%  | 1.2%  | 0.0% | 0.0% | 0.1% | 0.1% |
| 45 to 64 years | Repair of fistula, oronasal or oromaxillary                                     | 168   | 68.5% | 97.6  | 5.4%  | 4.2%  | 0.0% | 0.0% | 0.0% | 0.0% |
| 45 to 64 years | Removal or revision of sling for stress incontinence                            | 215   | 52.1% | 119.0 | 8.8%  | 7.4%  | 0.0% | 0.0% | 0.0% | 0.1% |
| 45 to 64 years | Salpingo-oophorectomy                                                           | 184   | 60.3% | 121.9 | 11.4% | 2.2%  | 0.0% | 0.0% | 0.0% | 0.0% |
| 45 to 64 years | Enterolysis - open                                                              | 223   | 48.9% | 121.9 | 8.1%  | 3.6%  | 0.0% | 0.0% | 0.0% | 0.1% |
| 45 to 64 years | Arthroscopy of elbow                                                            | 196   | 55.6% | 136.2 | 4.6%  | 3.6%  | 0.0% | 0.0% | 0.0% | 0.0% |
| 45 to 64 years | Tendon lengthening or shortening, lower extremity                               | 205   | 51.7% | 124.6 | 20.0% | 3.9%  | 0.0% | 0.0% | 0.1% | 0.1% |
| 45 to 64 years | Plastic operation of penis to correct chordee or angulation                     | 146   | 71.2% | 104.0 | 6.8%  | 4.1%  | 0.0% | 0.0% | 0.0% | 0.0% |
| 45 to 64 years | Transplantation of kidneys                                                      | 237   | 43.5% | 77.1  | 6.3%  | 1.3%  | 0.0% | 0.0% | 0.0% | 0.0% |
| 45 to 64 years | Insertion or replacement of cranial neurostimulator pulse generator or receiver | 202   | 51.0% | 96.3  | 3.5%  | 12.4% | 0.0% | 0.0% | 0.0% | 0.2% |
| 45 to 64 years | Incision and drainage of rectal, perirectal, or perianal abscess                | 157   | 65.6% | 179.9 | 11.5% | 3.8%  | 0.0% | 0.0% | 0.0% | 0.0% |
| 45 to 64 years | Excision of prepatellar bursa                                                   | 182   | 56.0% | 183.5 | 8.8%  | 4.4%  | 0.0% | 0.1% | 0.0% | 0.1% |
| 45 to 64 years | Incision and drainage, thigh or knee region                                     | 198   | 50.5% | 128.3 | 9.6%  | 4.5%  | 0.0% | 0.0% | 0.0% | 0.1% |
| 45 to 64 years | Drainage of breast abscess                                                      | 241   | 41.1% | 78.0  | 5.4%  | 3.7%  | 0.0% | 0.0% | 0.0% | 0.1% |
| 45 to 64 years | Removal of tissue expander(s) without insertion of prosthesis                   | 205   | 48.3% | 95.3  | 3.4%  | 4.9%  | 0.0% | 0.0% | 0.0% | 0.1% |
| 45 to 64 years | Reinsertion of spinal fixation device                                           | 178   | 53.9% | 323.4 | 33.1% | 9.6%  | 0.0% | 0.1% | 0.2% | 0.1% |
| 45 to 64 years | Closure of the lacrimal punctum                                                 | 10430 | 0.9%  | 6.6   | 0.3%  | 0.2%  | 0.0% | 0.1% | 0.1% | 0.1% |
| 45 to 64 years | Nerve transection                                                               | 156   | 57.7% | 89.6  | 11.5% | 3.8%  | 0.0% | 0.0% | 0.0% | 0.0% |
| 45 to 64 years | Excision or transposition of pterygium                                          | 735   | 11.7% | 35.4  | 0.4%  | 0.3%  | 0.0% | 0.0% | 0.0% | 0.0% |
| 45 to 64 years | Laparoscopic fulguration of oviducts (with or without transection)              | 127   | 66.9% | 101.3 | 0.8%  | 1.6%  | 0.0% | 0.0% | 0.0% | 0.0% |
| 45 to 64 years | Prostatectomy - open                                                            | 124   | 68.5% | 90.5  | 5.6%  | 0.8%  | 0.0% | 0.0% | 0.0% | 0.0% |
| 45 to 64 years | Dacryocystorhinostomy                                                           | 212   | 39.2% | 42.3  | 4.2%  | 4.2%  | 0.0% | 0.0% | 0.0% | 0.1% |
| 45 to 64 years | Excision of lesion, cornea (keratectomy, lamellar, partial), except pterygium   | 413   | 19.1% | 27.4  | 1.5%  | 1.9%  | 0.0% | 0.0% | 0.0% | 0.1% |
| 45 to 64 years | Repair of rectocele                                                             | 139   | 56.8% | 89.8  | 5.0%  | 5.8%  | 0.0% | 0.0% | 0.0% | 0.1% |
| 45 to 64 years | Appendectomy - open                                                             | 138   | 57.2% | 80.8  | 7.2%  | 2.9%  | 0.0% | 0.0% | 0.0% | 0.0% |
| 45 to 64 years | Tympanostomy                                                                    | 808   | 9.7%  | 31.4  | 1.5%  | 1.0%  | 0.0% | 0.0% | 0.0% | 0.1% |

|                |                                                                                                                             |     |       |       |       |      |      |      |      |      |
|----------------|-----------------------------------------------------------------------------------------------------------------------------|-----|-------|-------|-------|------|------|------|------|------|
| 45 to 64 years | Tarsal tunnel release                                                                                                       | 166 | 47.0% | 135.7 | 13.3% | 3.6% | 0.0% | 0.0% | 0.0% | 0.0% |
| 45 to 64 years | Exploration of penetrating wound                                                                                            | 192 | 40.1% | 77.8  | 7.8%  | 4.2% | 0.0% | 0.0% | 0.0% | 0.1% |
| 45 to 64 years | Intestinal procedure, resection and anastomosis - laparoscopic                                                              | 125 | 60.8% | 148.8 | 11.2% | 4.0% | 0.0% | 0.0% | 0.0% | 0.0% |
| 45 to 64 years | Neuroendoscopy, intracranial                                                                                                | 154 | 48.7% | 153.3 | 6.5%  | 0.6% | 0.0% | 0.0% | 0.0% | 0.0% |
| 45 to 64 years | Osteoplasty of upper extremity                                                                                              | 130 | 57.7% | 138.0 | 12.3% | 3.8% | 0.0% | 0.0% | 0.0% | 0.0% |
| 45 to 64 years | Ligamentous reconstruction (augmentation), knee                                                                             | 142 | 52.1% | 151.6 | 17.6% | 3.5% | 0.0% | 0.0% | 0.1% | 0.0% |
| 45 to 64 years | Sesamoidectomy, first toe                                                                                                   | 154 | 47.4% | 128.5 | 5.8%  | 3.9% | 0.0% | 0.0% | 0.0% | 0.0% |
| 45 to 64 years | Exploratory laparotomy                                                                                                      | 139 | 52.5% | 137.2 | 13.7% | 2.9% | 0.0% | 0.0% | 0.1% | 0.0% |
| 45 to 64 years | Keratoplasty                                                                                                                | 755 | 9.5%  | 21.5  | 1.7%  | 0.8% | 0.0% | 0.0% | 0.0% | 0.0% |
| 45 to 64 years | Excision of local lesion of epididymis                                                                                      | 96  | 75.0% | 109.5 | 5.2%  | 3.1% | 0.0% | 0.0% | 0.0% | 0.0% |
| 45 to 64 years | Application of external fixation system                                                                                     | 130 | 54.6% | 158.7 | 26.2% | 3.1% | 0.0% | 0.0% | 0.1% | 0.0% |
| 45 to 64 years | Repair of primary, torn ligament and/or capsule, knee                                                                       | 119 | 58.8% | 213.1 | 18.5% | 5.0% | 0.0% | 0.0% | 0.1% | 0.0% |
| 45 to 64 years | Gastrorrhaphy, suture of perforated duodenal or gastric ulcer, wound, or injury                                             | 127 | 54.3% | 157.7 | 12.6% | 3.1% | 0.0% | 0.0% | 0.0% | 0.0% |
| 45 to 64 years | Tendon transfer, lower extremity                                                                                            | 129 | 52.7% | 324.5 | 30.2% | 1.6% | 0.0% | 0.1% | 0.1% | 0.0% |
| 45 to 64 years | Thoracoscopy, with pulmonary decortication                                                                                  | 127 | 52.8% | 166.9 | 18.1% | 2.4% | 0.0% | 0.0% | 0.0% | 0.0% |
| 45 to 64 years | Incision and drainage, leg or ankle                                                                                         | 221 | 29.9% | 135.6 | 9.5%  | 3.6% | 0.0% | 0.0% | 0.1% | 0.1% |
| 45 to 64 years | Myomectomy, fibroid                                                                                                         | 203 | 32.5% | 42.6  | 3.9%  | 0.5% | 0.0% | 0.0% | 0.0% | 0.0% |
| 45 to 64 years | Aneurysm/pseudoaneurysm repair                                                                                              | 106 | 62.3% | 114.0 | 13.2% | 4.7% | 0.0% | 0.0% | 0.0% | 0.0% |
| 45 to 64 years | Prophylactic treatment (nailing, pinning, plating or wiring) of bone, lower extremity                                       | 96  | 68.8% | 278.2 | 29.2% | 5.2% | 0.0% | 0.0% | 0.1% | 0.0% |
| 45 to 64 years | Hysterectomy, extended - open                                                                                               | 105 | 61.9% | 133.5 | 8.6%  | 1.0% | 0.0% | 0.0% | 0.0% | 0.0% |
| 45 to 64 years | Arthroplasty of elbow                                                                                                       | 101 | 64.4% | 199.6 | 20.8% | 3.0% | 0.0% | 0.0% | 0.0% | 0.0% |
| 45 to 64 years | Reconstruction of mandible or maxilla                                                                                       | 119 | 52.9% | 90.2  | 10.1% | 5.9% | 0.0% | 0.0% | 0.0% | 0.0% |
| 45 to 64 years | Open treatment of rib fracture                                                                                              | 91  | 68.1% | 196.0 | 36.3% | 5.5% | 0.0% | 0.0% | 0.1% | 0.0% |
| 45 to 64 years | Excision of distal ulna                                                                                                     | 81  | 76.5% | 183.5 | 18.5% | 3.7% | 0.0% | 0.0% | 0.0% | 0.0% |
| 45 to 64 years | Capsulodesis, metacarpophalangeal joint                                                                                     | 89  | 67.4% | 150.5 | 19.1% | 5.6% | 0.0% | 0.0% | 0.0% | 0.0% |
| 45 to 64 years | Excision of thyroglossal duct cyst or sinus                                                                                 | 94  | 62.8% | 95.6  | 1.1%  | 1.1% | 0.0% | 0.0% | 0.0% | 0.0% |
| 45 to 64 years | Exploration of artery without surgical repair                                                                               | 93  | 63.4% | 133.9 | 17.2% | 9.7% | 0.0% | 0.0% | 0.0% | 0.1% |
| 45 to 64 years | Cystorrhaphy, suture of bladder wound, injury or rupture                                                                    | 90  | 65.6% | 134.1 | 7.8%  | 4.4% | 0.0% | 0.0% | 0.0% | 0.0% |
| 45 to 64 years | Laser enucleation of the prostate with morcellation                                                                         | 271 | 21.4% | 20.7  | 1.1%  | 0.4% | 0.0% | 0.0% | 0.0% | 0.0% |
| 45 to 64 years | Insertion or replacement of peripheral or gastric neurostimulator pulse generator or receiver, direct or inductive coupling | 137 | 42.3% | 62.5  | 6.6%  | 5.1% | 0.0% | 0.0% | 0.0% | 0.0% |
| 45 to 64 years | Implantation, removal, or replacement of osseointegrated implant, temporal bone                                             | 110 | 52.7% | 125.0 | 5.5%  | 0.9% | 0.0% | 0.0% | 0.0% | 0.0% |

|                |                                                                                                  |     |       |       |       |       |      |      |      |      |
|----------------|--------------------------------------------------------------------------------------------------|-----|-------|-------|-------|-------|------|------|------|------|
| 45 to 64 years | Capsulectomy or capsulotomy, hand                                                                | 106 | 54.7% | 91.3  | 15.1% | 4.7%  | 0.0% | 0.0% | 0.0% | 0.0% |
| 45 to 64 years | Palatopharyngoplasty                                                                             | 101 | 57.4% | 234.1 | 23.8% | 3.0%  | 0.0% | 0.0% | 0.0% | 0.0% |
| 45 to 64 years | Thoracoscopy, excision of pericardial or mediastinal mass                                        | 71  | 81.7% | 222.7 | 22.5% | 1.4%  | 0.0% | 0.0% | 0.0% | 0.0% |
| 45 to 64 years | Rib excision                                                                                     | 103 | 55.3% | 158.6 | 13.6% | 10.7% | 0.0% | 0.0% | 0.0% | 0.1% |
| 45 to 64 years | Resection or excision of neoplastic, vascular or infectious lesion, intracranial                 | 97  | 58.8% | 128.9 | 16.5% | 3.1%  | 0.0% | 0.0% | 0.0% | 0.0% |
| 45 to 64 years | Ureteroneocystostomy                                                                             | 86  | 65.1% | 115.7 | 12.8% | 1.2%  | 0.0% | 0.0% | 0.0% | 0.0% |
| 45 to 64 years | Removal of implant; superficial (eg, buried wire, pin or rod)                                    | 489 | 11.2% | 26.3  | 3.5%  | 0.8%  | 0.0% | 0.0% | 0.0% | 0.0% |
| 45 to 64 years | Repair of nonunion or malunion, foot bones                                                       | 102 | 53.9% | 170.3 | 18.6% | 5.9%  | 0.0% | 0.0% | 0.0% | 0.0% |
| 45 to 64 years | Mastoidectomy                                                                                    | 84  | 65.5% | 91.8  | 8.3%  | 3.6%  | 0.0% | 0.0% | 0.0% | 0.0% |
| 45 to 64 years | Ligation or banding of angioaccess arteriovenous fistula                                         | 138 | 39.1% | 45.1  | 4.3%  | 2.2%  | 0.0% | 0.0% | 0.0% | 0.0% |
| 45 to 64 years | Tenodesis, hand                                                                                  | 84  | 63.1% | 157.8 | 13.1% | 2.4%  | 0.0% | 0.0% | 0.0% | 0.0% |
| 45 to 64 years | Osteotomy of upper extremity                                                                     | 80  | 65.0% | 156.7 | 11.3% | 2.5%  | 0.0% | 0.0% | 0.0% | 0.0% |
| 45 to 64 years | Embolectomy or thrombectomy                                                                      | 108 | 47.2% | 141.5 | 14.8% | 1.9%  | 0.0% | 0.0% | 0.0% | 0.0% |
| 45 to 64 years | Cranioplasty                                                                                     | 95  | 53.7% | 145.8 | 7.4%  | 3.2%  | 0.0% | 0.0% | 0.0% | 0.0% |
| 45 to 64 years | Plastic repair of salivary duct, sialodochoplasty                                                | 88  | 56.8% | 78.5  | 5.7%  | 2.3%  | 0.0% | 0.0% | 0.0% | 0.0% |
| 45 to 64 years | Nipple exploration or reconstruction                                                             | 222 | 22.1% | 29.2  | 2.7%  | 1.4%  | 0.0% | 0.0% | 0.0% | 0.0% |
| 45 to 64 years | Repair of ectropion                                                                              | 189 | 25.9% | 41.6  | 1.6%  | 3.2%  | 0.0% | 0.0% | 0.0% | 0.0% |
| 45 to 64 years | Orbitotomy                                                                                       | 153 | 32.0% | 53.8  | 3.3%  | 0.7%  | 0.0% | 0.0% | 0.0% | 0.0% |
| 45 to 64 years | Ablation of intra-abdominal tumor or benign lesion - laparoscopic                                | 78  | 62.8% | 102.7 | 10.3% | 2.6%  | 0.0% | 0.0% | 0.0% | 0.0% |
| 45 to 64 years | Laparoscopic hernia repair                                                                       | 72  | 68.1% | 168.1 | 5.6%  | 4.2%  | 0.0% | 0.0% | 0.0% | 0.0% |
| 45 to 64 years | Transcatheter placement of intravascular stent - percutaneous                                    | 245 | 19.6% | 23.2  | 1.6%  | 3.3%  | 0.0% | 0.0% | 0.0% | 0.1% |
| 45 to 64 years | Muscle transfer, upper extremity                                                                 | 104 | 46.2% | 110.0 | 14.4% | 4.8%  | 0.0% | 0.0% | 0.0% | 0.0% |
| 45 to 64 years | Excision of Bartholin's gland or cyst                                                            | 99  | 48.5% | 70.4  | 6.1%  | 5.1%  | 0.0% | 0.0% | 0.0% | 0.0% |
| 45 to 64 years | Radical resection of capsule, soft tissue, and heterotopic bone, elbow, with contracture release | 74  | 64.9% | 136.3 | 5.4%  | 0.0%  | 0.0% | 0.0% | 0.0% | 0.0% |
| 45 to 64 years | Thoracoscopy, with pleurodesis                                                                   | 123 | 38.2% | 137.9 | 10.6% | 2.4%  | 0.0% | 0.0% | 0.0% | 0.0% |
| 45 to 64 years | Colostomy - open                                                                                 | 91  | 51.6% | 119.6 | 15.4% | 5.5%  | 0.0% | 0.0% | 0.0% | 0.0% |
| 45 to 64 years | Laryngoplasty                                                                                    | 86  | 54.7% | 161.8 | 8.1%  | 3.5%  | 0.0% | 0.0% | 0.0% | 0.0% |
| 45 to 64 years | Proctopexy - laparoscopic                                                                        | 74  | 63.5% | 244.1 | 9.5%  | 8.1%  | 0.0% | 0.0% | 0.0% | 0.0% |
| 45 to 64 years | Incision of bone cortex, shoulder and upper extremity                                            | 72  | 65.3% | 111.5 | 8.3%  | 1.4%  | 0.0% | 0.0% | 0.0% | 0.0% |
| 45 to 64 years | Resection of metatarsal or toe                                                                   | 105 | 43.8% | 65.1  | 6.7%  | 1.9%  | 0.0% | 0.0% | 0.0% | 0.0% |
| 45 to 64 years | Excision of synovial cyst of popliteal space                                                     | 80  | 57.5% | 130.7 | 11.3% | 3.8%  | 0.0% | 0.0% | 0.0% | 0.0% |
| 45 to 64 years | Patellectomy or hemipatellectomy                                                                 | 70  | 64.3% | 215.9 | 17.1% | 2.9%  | 0.0% | 0.0% | 0.0% | 0.0% |

|                |                                                                                                                    |     |       |       |       |      |      |      |      |      |
|----------------|--------------------------------------------------------------------------------------------------------------------|-----|-------|-------|-------|------|------|------|------|------|
| 45 to 64 years | Cystectomy                                                                                                         | 75  | 58.7% | 79.7  | 9.3%  | 2.7% | 0.0% | 0.0% | 0.0% | 0.0% |
| 45 to 64 years | Insertion of inflatable urethral/bladder neck sphincter, including placement of pump, reservoir, and cuff          | 63  | 69.8% | 89.1  | 7.9%  | 4.8% | 0.0% | 0.0% | 0.0% | 0.0% |
| 45 to 64 years | Thoracoscopy, with thymectomy                                                                                      | 59  | 74.6% | 149.3 | 13.6% | 8.5% | 0.0% | 0.0% | 0.0% | 0.0% |
| 45 to 64 years | Excision of lesion of mucosa and submucosa, vestibule of mouth                                                     | 124 | 34.7% | 25.5  | 2.4%  | 2.4% | 0.0% | 0.0% | 0.0% | 0.0% |
| 45 to 64 years | Excision of trochanteric bursa or calcification                                                                    | 80  | 53.8% | 178.0 | 26.3% | 3.8% | 0.0% | 0.0% | 0.0% | 0.0% |
| 45 to 64 years | Ethmoidectomy                                                                                                      | 74  | 58.1% | 65.4  | 4.1%  | 2.7% | 0.0% | 0.0% | 0.0% | 0.0% |
| 45 to 64 years | Incision and drainage of abscess, cyst, or hematoma of tongue or floor of mouth                                    | 71  | 60.6% | 85.0  | 8.5%  | 1.4% | 0.0% | 0.0% | 0.0% | 0.0% |
| 45 to 64 years | Excision of cyst or adenoma of thyroid, or transection of isthmus                                                  | 77  | 54.5% | 60.1  | 6.5%  | 3.9% | 0.0% | 0.0% | 0.0% | 0.0% |
| 45 to 64 years | Varicocele repair                                                                                                  | 66  | 63.6% | 75.1  | 6.1%  | 1.5% | 0.0% | 0.0% | 0.0% | 0.0% |
| 45 to 64 years | Excision of vaginal cyst or tumor                                                                                  | 260 | 15.8% | 18.5  | 0.8%  | 0.8% | 0.0% | 0.0% | 0.0% | 0.0% |
| 45 to 64 years | Incision of bone cortex, pelvis and lower extremity                                                                | 99  | 41.4% | 131.7 | 14.1% | 0.0% | 0.0% | 0.0% | 0.0% | 0.0% |
| 45 to 64 years | Uvulectomy, excision of uvula                                                                                      | 82  | 50.0% | 82.5  | 3.7%  | 4.9% | 0.0% | 0.0% | 0.0% | 0.0% |
| 45 to 64 years | Decompression fasciotomy of lower extremity                                                                        | 72  | 56.9% | 156.1 | 26.4% | 1.4% | 0.0% | 0.0% | 0.0% | 0.0% |
| 45 to 64 years | Urethrolisis, transvaginal, secondary - open, including cystourethroscopy (eg, postsurgical obstruction, scarring) | 71  | 57.7% | 87.1  | 9.9%  | 9.9% | 0.0% | 0.0% | 0.0% | 0.0% |
| 45 to 64 years | Cystotomy or cystostomy                                                                                            | 112 | 35.7% | 51.7  | 11.6% | 3.6% | 0.0% | 0.0% | 0.0% | 0.0% |
| 45 to 64 years | Burr hole(s) or trephine                                                                                           | 99  | 40.4% | 79.7  | 6.1%  | 6.1% | 0.0% | 0.0% | 0.0% | 0.0% |
| 45 to 64 years | Paravaginal defect repair - laparoscopic                                                                           | 84  | 47.6% | 70.4  | 2.4%  | 3.6% | 0.0% | 0.0% | 0.0% | 0.0% |
| 45 to 64 years | Esophagectomy                                                                                                      | 63  | 63.5% | 263.1 | 25.4% | 4.8% | 0.0% | 0.0% | 0.0% | 0.0% |
| 45 to 64 years | Epididymectomy                                                                                                     | 52  | 76.9% | 142.6 | 7.7%  | 0.0% | 0.0% | 0.0% | 0.0% | 0.0% |
| 45 to 64 years | Reconstruction of face                                                                                             | 75  | 52.0% | 89.9  | 13.3% | 5.3% | 0.0% | 0.0% | 0.0% | 0.0% |
| 45 to 64 years | Radical resection of tonsil, tonsillar pillars, and/or retromolar trigone                                          | 57  | 68.4% | 153.6 | 19.3% | 3.5% | 0.0% | 0.0% | 0.0% | 0.0% |
| 45 to 64 years | Reconstruction of hand interphalangeal joint                                                                       | 55  | 70.9% | 140.6 | 10.9% | 0.0% | 0.0% | 0.0% | 0.0% | 0.0% |
| 45 to 64 years | Laparoscopic esophagus procedure sphincter augmentation                                                            | 54  | 72.2% | 89.4  | 3.7%  | 3.7% | 0.0% | 0.0% | 0.0% | 0.0% |
| 45 to 64 years | Revision (including removal) of prosthetic vaginal graft - open                                                    | 86  | 44.2% | 133.8 | 7.0%  | 5.8% | 0.0% | 0.0% | 0.0% | 0.0% |
| 45 to 64 years | Excision of penile plaque                                                                                          | 55  | 69.1% | 95.2  | 7.3%  | 5.5% | 0.0% | 0.0% | 0.0% | 0.0% |
| 45 to 64 years | Creation of pericardial window                                                                                     | 86  | 43.0% | 66.7  | 5.8%  | 3.5% | 0.0% | 0.0% | 0.0% | 0.0% |
| 45 to 64 years | Maxillectomy                                                                                                       | 66  | 56.1% | 83.7  | 9.1%  | 0.0% | 0.0% | 0.0% | 0.0% | 0.0% |
| 45 to 64 years | Infratemporal pre-auricular approach to middle cranial fossa                                                       | 60  | 61.7% | 183.3 | 5.0%  | 5.0% | 0.0% | 0.0% | 0.0% | 0.0% |
| 45 to 64 years | Intestinal procedure, colon repair without or without ostomy for ulcer, diverticulum, wound, or injury             | 57  | 64.9% | 98.4  | 8.8%  | 7.0% | 0.0% | 0.0% | 0.0% | 0.0% |
| 45 to 64 years | Osteotomy of clavicle                                                                                              | 58  | 62.1% | 286.8 | 22.4% | 3.4% | 0.0% | 0.0% | 0.0% | 0.0% |

|                |                                                                                                |     |       |       |       |       |      |      |      |      |
|----------------|------------------------------------------------------------------------------------------------|-----|-------|-------|-------|-------|------|------|------|------|
| 45 to 64 years | Reconstruction of tendon pulley; finger                                                        | 56  | 64.3% | 114.3 | 5.4%  | 1.8%  | 0.0% | 0.0% | 0.0% | 0.0% |
| 45 to 64 years | Arthroplasty of temporomandibular joint                                                        | 51  | 70.6% | 208.7 | 13.7% | 11.8% | 0.0% | 0.0% | 0.0% | 0.0% |
| 45 to 64 years | Proctopexy - open                                                                              | 49  | 71.4% | 164.5 | 10.2% | 10.2% | 0.0% | 0.0% | 0.0% | 0.0% |
| 45 to 64 years | Intestinal procedure, intestinal hernia and volvulus derotation open laparotomy                | 67  | 50.7% | 91.3  | 14.9% | 4.5%  | 0.0% | 0.0% | 0.0% | 0.0% |
| 45 to 64 years | Liver transplantation                                                                          | 66  | 51.5% | 172.2 | 13.6% | 3.0%  | 0.0% | 0.0% | 0.0% | 0.0% |
| 45 to 64 years | Excision of stomach ulcer or tumor                                                             | 50  | 68.0% | 96.0  | 18.0% | 6.0%  | 0.0% | 0.0% | 0.0% | 0.0% |
| 45 to 64 years | Repair of blood vessel                                                                         | 160 | 20.6% | 40.2  | 7.5%  | 1.9%  | 0.0% | 0.0% | 0.0% | 0.0% |
| 45 to 64 years | Proctoplasty                                                                                   | 61  | 54.1% | 111.9 | 11.5% | 6.6%  | 0.0% | 0.0% | 0.0% | 0.0% |
| 45 to 64 years | Osteochondral allograft, knee - open                                                           | 56  | 58.9% | 254.1 | 23.2% | 1.8%  | 0.0% | 0.0% | 0.0% | 0.0% |
| 45 to 64 years | Laparoscopic occlusion of oviducts by device (eg, band, clip, or Falope ring)                  | 52  | 63.5% | 100.0 | 0.0%  | 5.8%  | 0.0% | 0.0% | 0.0% | 0.0% |
| 45 to 64 years | Scrotoplasty                                                                                   | 46  | 71.7% | 98.0  | 13.0% | 10.9% | 0.0% | 0.0% | 0.0% | 0.0% |
| 45 to 64 years | Excision and repair of eyelid                                                                  | 248 | 12.9% | 21.0  | 1.2%  | 0.4%  | 0.0% | 0.0% | 0.0% | 0.0% |
| 45 to 64 years | Tenolysis, lower extremity                                                                     | 90  | 35.6% | 99.4  | 3.3%  | 2.2%  | 0.0% | 0.0% | 0.0% | 0.0% |
| 45 to 64 years | Laparoscopic sling operation for stress incontinence (eg, fascia or synthetic)                 | 50  | 64.0% | 94.0  | 6.0%  | 2.0%  | 0.0% | 0.0% | 0.0% | 0.0% |
| 45 to 64 years | Transtemporal, transcochlear, transcondylar, transpetrosal approach to posterior cranial fossa | 44  | 72.7% | 158.9 | 2.3%  | 6.8%  | 0.0% | 0.0% | 0.0% | 0.0% |
| 45 to 64 years | Intracranial aneurysm repair - open                                                            | 96  | 32.3% | 187.0 | 8.3%  | 1.0%  | 0.0% | 0.0% | 0.0% | 0.0% |
| 45 to 64 years | Colostomy - laparoscopic                                                                       | 59  | 52.5% | 191.9 | 25.4% | 5.1%  | 0.0% | 0.0% | 0.0% | 0.0% |
| 45 to 64 years | Reconstruction of shoulder                                                                     | 57  | 54.4% | 247.6 | 29.8% | 10.5% | 0.0% | 0.0% | 0.0% | 0.0% |
| 45 to 64 years | Biliary reconstruction - open                                                                  | 46  | 67.4% | 153.4 | 13.0% | 4.3%  | 0.0% | 0.0% | 0.0% | 0.0% |
| 45 to 64 years | Sling operation for correction of male urinary incontinence                                    | 44  | 70.5% | 165.1 | 6.8%  | 2.3%  | 0.0% | 0.0% | 0.0% | 0.0% |
| 45 to 64 years | Conjunctival flap                                                                              | 166 | 18.1% | 12.4  | 1.2%  | 1.8%  | 0.0% | 0.0% | 0.0% | 0.0% |
| 45 to 64 years | Thymectomy, with or without lymphadenectomy                                                    | 53  | 56.6% | 169.7 | 13.2% | 1.9%  | 0.0% | 0.0% | 0.0% | 0.0% |
| 45 to 64 years | Elbow ligament reconstruction                                                                  | 48  | 62.5% | 250.9 | 10.4% | 2.1%  | 0.0% | 0.0% | 0.0% | 0.0% |
| 45 to 64 years | Ventriculomyotomy (-myectomy) for idiopathic hypertrophic subaortic stenosis                   | 37  | 81.1% | 283.9 | 13.5% | 5.4%  | 0.0% | 0.0% | 0.0% | 0.0% |
| 45 to 64 years | Mastopexy                                                                                      | 73  | 39.7% | 70.2  | 1.4%  | 4.1%  | 0.0% | 0.0% | 0.0% | 0.0% |
| 45 to 64 years | Splenectomy - laparoscopic                                                                     | 44  | 65.9% | 175.0 | 9.1%  | 2.3%  | 0.0% | 0.0% | 0.0% | 0.0% |
| 45 to 64 years | Excision of lip                                                                                | 105 | 26.7% | 71.8  | 0.0%  | 1.0%  | 0.0% | 0.0% | 0.0% | 0.0% |
| 45 to 64 years | Thoracotomy, with pulmonary decortication                                                      | 52  | 53.8% | 234.4 | 25.0% | 1.9%  | 0.0% | 0.0% | 0.0% | 0.0% |
| 45 to 64 years | Splenectomy - open                                                                             | 51  | 54.9% | 97.5  | 7.8%  | 2.0%  | 0.0% | 0.0% | 0.0% | 0.0% |
| 45 to 64 years | Laparoscopic bladder procedure                                                                 | 45  | 62.2% | 138.4 | 4.4%  | 2.2%  | 0.0% | 0.0% | 0.0% | 0.0% |
| 45 to 64 years | Enucleation of eye                                                                             | 51  | 52.9% | 190.3 | 7.8%  | 3.9%  | 0.0% | 0.0% | 0.0% | 0.0% |
| 45 to 64 years | Sternal ostectomy, debridement, resection                                                      | 40  | 67.5% | 110.7 | 10.0% | 0.0%  | 0.0% | 0.0% | 0.0% | 0.0% |

|                |                                                                                               |     |       |       |       |       |      |      |      |      |
|----------------|-----------------------------------------------------------------------------------------------|-----|-------|-------|-------|-------|------|------|------|------|
| 45 to 64 years | Capsulotomy, foot and/or toes                                                                 | 216 | 12.0% | 30.2  | 1.9%  | 0.5%  | 0.0% | 0.0% | 0.0% | 0.0% |
| 45 to 64 years | Stereotactic biopsy, aspiration, or excision, including burr hole(s), for intracranial lesion | 85  | 30.6% | 46.9  | 5.9%  | 5.9%  | 0.0% | 0.0% | 0.0% | 0.0% |
| 45 to 64 years | Removal of prosthesis, knee                                                                   | 53  | 49.1% | 297.6 | 32.1% | 5.7%  | 0.0% | 0.0% | 0.1% | 0.0% |
| 45 to 64 years | Exploration for postoperative hemorrhage, thrombosis or infection                             | 49  | 53.1% | 307.9 | 20.4% | 4.1%  | 0.0% | 0.0% | 0.0% | 0.0% |
| 45 to 64 years | Intestinal procedure, ileostomy or jejunostomy                                                | 39  | 66.7% | 178.8 | 20.5% | 2.6%  | 0.0% | 0.0% | 0.0% | 0.0% |
| 45 to 64 years | Resection of mediastinal tumor                                                                | 38  | 68.4% | 247.6 | 18.4% | 0.0%  | 0.0% | 0.0% | 0.0% | 0.0% |
| 45 to 64 years | Correction of lid retraction                                                                  | 92  | 27.2% | 39.6  | 1.1%  | 3.3%  | 0.0% | 0.0% | 0.0% | 0.0% |
| 45 to 64 years | Resection of diaphragm                                                                        | 42  | 59.5% | 101.3 | 11.9% | 0.0%  | 0.0% | 0.0% | 0.0% | 0.0% |
| 45 to 64 years | Excision or destruction of lingual tonsil, any method (separate procedure)                    | 39  | 64.1% | 119.4 | 33.3% | 5.1%  | 0.0% | 0.0% | 0.0% | 0.0% |
| 45 to 64 years | Fascia lata graft                                                                             | 37  | 67.6% | 123.4 | 10.8% | 10.8% | 0.0% | 0.0% | 0.0% | 0.0% |
| 45 to 64 years | Incision and drainage, pelvis or hip joint area                                               | 60  | 40.0% | 104.0 | 13.3% | 0.0%  | 0.0% | 0.0% | 0.0% | 0.0% |
| 45 to 64 years | Excision of lesion of meniscus or capsule, knee                                               | 49  | 49.0% | 64.0  | 2.0%  | 0.0%  | 0.0% | 0.0% | 0.0% | 0.0% |
| 45 to 64 years | Repair of enterocele                                                                          | 31  | 77.4% | 197.0 | 6.5%  | 9.7%  | 0.0% | 0.0% | 0.0% | 0.0% |
| 45 to 64 years | Excision of cardiac tumor with cardiopulmonary bypass                                         | 30  | 80.0% | 140.5 | 13.3% | 0.0%  | 0.0% | 0.0% | 0.0% | 0.0% |
| 45 to 64 years | Spine bony resection                                                                          | 35  | 65.7% | 248.7 | 22.9% | 8.6%  | 0.0% | 0.0% | 0.0% | 0.0% |
| 45 to 64 years | Endolymphatic sac operation                                                                   | 39  | 56.4% | 71.3  | 7.7%  | 5.1%  | 0.0% | 0.0% | 0.0% | 0.0% |
| 45 to 64 years | Neurectomy                                                                                    | 39  | 56.4% | 190.4 | 10.3% | 5.1%  | 0.0% | 0.0% | 0.0% | 0.0% |
| 45 to 64 years | Secondary repair of dura for cerebrospinal fluid leak                                         | 39  | 56.4% | 100.7 | 12.8% | 7.7%  | 0.0% | 0.0% | 0.0% | 0.0% |
| 45 to 64 years | Oophrectomy                                                                                   | 33  | 66.7% | 203.6 | 15.2% | 3.0%  | 0.0% | 0.0% | 0.0% | 0.0% |
| 45 to 64 years | Repair of tunica vaginalis hydrocele                                                          | 32  | 68.8% | 56.7  | 3.1%  | 3.1%  | 0.0% | 0.0% | 0.0% | 0.0% |
| 45 to 64 years | Plastic repair of canaliculi                                                                  | 87  | 24.1% | 53.6  | 1.1%  | 0.0%  | 0.0% | 0.0% | 0.0% | 0.0% |
| 45 to 64 years | Canthoplasty                                                                                  | 85  | 24.7% | 20.1  | 1.2%  | 0.0%  | 0.0% | 0.0% | 0.0% | 0.0% |
| 45 to 64 years | Sialolithotomy                                                                                | 53  | 39.6% | 41.3  | 1.9%  | 3.8%  | 0.0% | 0.0% | 0.0% | 0.0% |
| 45 to 64 years | Incision and drainage of abscess in posterior spine                                           | 46  | 45.7% | 198.5 | 8.7%  | 10.9% | 0.0% | 0.0% | 0.0% | 0.0% |
| 45 to 64 years | Thrombectomy of arterial or venous graft                                                      | 40  | 52.5% | 129.8 | 22.5% | 2.5%  | 0.0% | 0.0% | 0.0% | 0.0% |
| 45 to 64 years | Ablation of intraabdominal tumor or benign lesion ♦ open                                      | 31  | 67.7% | 115.8 | 12.9% | 3.2%  | 0.0% | 0.0% | 0.0% | 0.0% |
| 45 to 64 years | Radical resection of tumor, bone                                                              | 29  | 72.4% | 345.3 | 24.1% | 3.4%  | 0.0% | 0.0% | 0.0% | 0.0% |
| 45 to 64 years | TIPS                                                                                          | 162 | 12.3% | 37.6  | 2.5%  | 0.6%  | 0.0% | 0.0% | 0.0% | 0.0% |
| 45 to 64 years | Capsulectomy or capsulotomy, hip                                                              | 39  | 51.3% | 123.5 | 7.7%  | 5.1%  | 0.0% | 0.0% | 0.0% | 0.0% |
| 45 to 64 years | Umbilectomy, omphalectomy, excision of umbilicus                                              | 32  | 62.5% | 76.8  | 6.3%  | 0.0%  | 0.0% | 0.0% | 0.0% | 0.0% |
| 45 to 64 years | Debridement of sternum                                                                        | 30  | 66.7% | 155.2 | 20.0% | 0.0%  | 0.0% | 0.0% | 0.0% | 0.0% |
| 45 to 64 years | Tracheostomy                                                                                  | 117 | 16.2% | 78.3  | 5.1%  | 0.0%  | 0.0% | 0.0% | 0.0% | 0.0% |



|                |                                                                          |      |       |       |       |       |      |      |      |      |
|----------------|--------------------------------------------------------------------------|------|-------|-------|-------|-------|------|------|------|------|
| 45 to 64 years | Vaginectomy                                                              | 50   | 38.0% | 71.5  | 6.0%  | 4.0%  | 0.0% | 0.0% | 0.0% | 0.0% |
| 45 to 64 years | Sinusotomy, with or without reconstruction                               | 35   | 54.3% | 142.0 | 14.3% | 2.9%  | 0.0% | 0.0% | 0.0% | 0.0% |
| 45 to 64 years | Closure of intestinal fistula                                            | 34   | 55.9% | 184.1 | 17.6% | 5.9%  | 0.0% | 0.0% | 0.0% | 0.0% |
| 45 to 64 years | Repair of paraesophageal hiatal hernia (including fundoplication)        | 32   | 59.4% | 145.7 | 18.8% | 6.3%  | 0.0% | 0.0% | 0.0% | 0.0% |
| 45 to 64 years | Excision of lesion of spermatic cord                                     | 24   | 79.2% | 77.0  | 4.2%  | 0.0%  | 0.0% | 0.0% | 0.0% | 0.0% |
| 45 to 64 years | Laparoscopic gastrostomy, without construction of gastric tube           | 39   | 46.2% | 147.1 | 25.6% | 7.7%  | 0.0% | 0.0% | 0.0% | 0.0% |
| 45 to 64 years | Tubercleplasty of anterior tibia                                         | 34   | 52.9% | 184.9 | 29.4% | 5.9%  | 0.0% | 0.0% | 0.0% | 0.0% |
| 45 to 64 years | Intracranial arteriovenous malformation repair                           | 33   | 54.5% | 101.8 | 9.1%  | 12.1% | 0.0% | 0.0% | 0.0% | 0.0% |
| 45 to 64 years | Excision of chest wall tumor, including ribs                             | 31   | 58.1% | 151.3 | 22.6% | 12.9% | 0.0% | 0.0% | 0.0% | 0.0% |
| 45 to 64 years | Evisceration of ocular contents                                          | 30   | 60.0% | 271.0 | 13.3% | 0.0%  | 0.0% | 0.0% | 0.0% | 0.0% |
| 45 to 64 years | Repair of entropion                                                      | 91   | 18.7% | 30.3  | 4.4%  | 2.2%  | 0.0% | 0.0% | 0.0% | 0.0% |
| 45 to 64 years | Reconstruction of toe                                                    | 41   | 41.5% | 178.0 | 2.4%  | 0.0%  | 0.0% | 0.0% | 0.0% | 0.0% |
| 45 to 64 years | Perineoplasty, repair of perineum, nonobstetrical                        | 38   | 44.7% | 53.1  | 2.6%  | 5.3%  | 0.0% | 0.0% | 0.0% | 0.0% |
| 45 to 64 years | Operative tissue ablation and reconstruction of atria - endoscopic       | 34   | 50.0% | 92.7  | 5.9%  | 2.9%  | 0.0% | 0.0% | 0.0% | 0.0% |
| 45 to 64 years | Lateral retinacular release - open                                       | 28   | 60.7% | 339.3 | 28.6% | 7.1%  | 0.0% | 0.0% | 0.0% | 0.0% |
| 45 to 64 years | Orchiopexy                                                               | 26   | 65.4% | 69.2  | 7.7%  | 0.0%  | 0.0% | 0.0% | 0.0% | 0.0% |
| 45 to 64 years | Adrenalectomy - open                                                     | 25   | 68.0% | 103.0 | 12.0% | 0.0%  | 0.0% | 0.0% | 0.0% | 0.0% |
| 45 to 64 years | Removal and/or replacement of inflatable urethral/bladder neck sphincter | 21   | 81.0% | 92.3  | 4.8%  | 9.5%  | 0.0% | 0.0% | 0.0% | 0.0% |
| 45 to 64 years | Destruction of localized lesion of retina                                | 1431 | 1.1%  | 6.7   | 0.3%  | 0.3%  | 0.0% | 0.0% | 0.0% | 0.0% |
| 45 to 64 years | Capsulotomy, posterior capsular release, knee                            | 28   | 57.1% | 196.5 | 28.6% | 0.0%  | 0.0% | 0.0% | 0.0% | 0.0% |
| 45 to 64 years | Excision of urethral diverticulum                                        | 28   | 57.1% | 63.3  | 10.7% | 3.6%  | 0.0% | 0.0% | 0.0% | 0.0% |
| 45 to 64 years | Cystolithotomy, cystotomy with removal of calculus                       | 27   | 59.3% | 99.3  | 3.7%  | 3.7%  | 0.0% | 0.0% | 0.0% | 0.0% |
| 45 to 64 years | Ocular surface reconstruction                                            | 107  | 14.0% | 20.9  | 0.0%  | 0.0%  | 0.0% | 0.0% | 0.0% | 0.0% |
| 45 to 64 years | Cryosurgical ablation of the prostate                                    | 55   | 27.3% | 48.8  | 7.3%  | 1.8%  | 0.0% | 0.0% | 0.0% | 0.0% |
| 45 to 64 years | Division of plantar fascia and muscle                                    | 39   | 38.5% | 75.3  | 7.7%  | 2.6%  | 0.0% | 0.0% | 0.0% | 0.0% |
| 45 to 64 years | Ureterolysis                                                             | 33   | 45.5% | 336.1 | 12.1% | 6.1%  | 0.0% | 0.0% | 0.0% | 0.0% |
| 45 to 64 years | Drainage of peritoneal abscess - open                                    | 32   | 46.9% | 86.6  | 15.6% | 0.0%  | 0.0% | 0.0% | 0.0% | 0.0% |
| 45 to 64 years | Muscle repair, hand                                                      | 24   | 62.5% | 132.8 | 16.7% | 4.2%  | 0.0% | 0.0% | 0.0% | 0.0% |
| 45 to 64 years | Closure of vaginal fistula                                               | 23   | 65.2% | 105.7 | 4.3%  | 13.0% | 0.0% | 0.0% | 0.0% | 0.0% |
| 45 to 64 years | Laparoscopic fibroid ablation                                            | 23   | 65.2% | 60.3  | 4.3%  | 4.3%  | 0.0% | 0.0% | 0.0% | 0.0% |
| 45 to 64 years | Reconstruction of diaphragm                                              | 23   | 65.2% | 152.1 | 13.0% | 4.3%  | 0.0% | 0.0% | 0.0% | 0.0% |
| 45 to 64 years | Resection of bone tumor                                                  | 23   | 65.2% | 203.2 | 26.1% | 4.3%  | 0.0% | 0.0% | 0.0% | 0.0% |
| 45 to 64 years | Coccygectomy, primary                                                    | 22   | 68.2% | 368.1 | 22.7% | 4.5%  | 0.0% | 0.0% | 0.0% | 0.0% |

|                |                                                                                                                       |     |       |       |       |       |      |      |      |      |
|----------------|-----------------------------------------------------------------------------------------------------------------------|-----|-------|-------|-------|-------|------|------|------|------|
| 45 to 64 years | Aqueous shunt to extraocular equatorial plate reservoir                                                               | 387 | 3.6%  | 9.6   | 1.3%  | 0.3%  | 0.0% | 0.0% | 0.0% | 0.0% |
| 45 to 64 years | Ciliary body destruction                                                                                              | 263 | 5.3%  | 4.0   | 0.4%  | 0.0%  | 0.0% | 0.0% | 0.0% | 0.0% |
| 45 to 64 years | Endovascular aortic valve replacement                                                                                 | 183 | 7.7%  | 20.2  | 0.5%  | 0.5%  | 0.0% | 0.0% | 0.0% | 0.0% |
| 45 to 64 years | Gastrostomy                                                                                                           | 27  | 51.9% | 148.9 | 14.8% | 7.4%  | 0.0% | 0.0% | 0.0% | 0.0% |
| 45 to 64 years | Excision of branchial cleft cyst, vestige, or fistula                                                                 | 26  | 53.8% | 121.3 | 7.7%  | 7.7%  | 0.0% | 0.0% | 0.0% | 0.0% |
| 45 to 64 years | Laparoscopic ureteral procedure                                                                                       | 21  | 66.7% | 109.2 | 14.3% | 4.8%  | 0.0% | 0.0% | 0.0% | 0.0% |
| 45 to 64 years | Ureteroileal conduit (ileal bladder), including intestine anastomosis                                                 | 17  | 82.4% | 230.0 | 23.5% | 0.0%  | 0.0% | 0.0% | 0.0% | 0.0% |
| 45 to 64 years | Excision of rectal procidentia                                                                                        | 16  | 87.5% | 137.7 | 37.5% | 6.3%  | 0.0% | 0.0% | 0.0% | 0.0% |
| 45 to 64 years | Removal of implanted material, eye                                                                                    | 307 | 4.2%  | 20.0  | 1.3%  | 0.7%  | 0.0% | 0.0% | 0.0% | 0.0% |
| 45 to 64 years | Insertion of interlaminar/interspinous process stabilization/distraction device                                       | 38  | 34.2% | 94.0  | 13.2% | 0.0%  | 0.0% | 0.0% | 0.0% | 0.0% |
| 45 to 64 years | Excision of infected graft                                                                                            | 34  | 38.2% | 110.4 | 5.9%  | 2.9%  | 0.0% | 0.0% | 0.0% | 0.0% |
| 45 to 64 years | Extensor tendon centralization, hand                                                                                  | 32  | 40.6% | 122.6 | 12.5% | 3.1%  | 0.0% | 0.0% | 0.0% | 0.0% |
| 45 to 64 years | Decompression fasciotomy of upper extremity                                                                           | 30  | 43.3% | 193.9 | 10.0% | 0.0%  | 0.0% | 0.0% | 0.0% | 0.0% |
| 45 to 64 years | Capsulotomy, wrist                                                                                                    | 29  | 44.8% | 75.6  | 6.9%  | 3.4%  | 0.0% | 0.0% | 0.0% | 0.0% |
| 45 to 64 years | Nasal/sinus endoscopy                                                                                                 | 26  | 50.0% | 235.2 | 19.2% | 3.8%  | 0.0% | 0.0% | 0.0% | 0.0% |
| 45 to 64 years | Urethrotomy                                                                                                           | 26  | 50.0% | 41.6  | 0.0%  | 3.8%  | 0.0% | 0.0% | 0.0% | 0.0% |
| 45 to 64 years | Division of scalenus anticus                                                                                          | 22  | 59.1% | 131.7 | 18.2% | 4.5%  | 0.0% | 0.0% | 0.0% | 0.0% |
| 45 to 64 years | Resection of palate or extensive resection of lesion                                                                  | 22  | 59.1% | 241.6 | 31.8% | 0.0%  | 0.0% | 0.0% | 0.0% | 0.0% |
| 45 to 64 years | Alveolectomy                                                                                                          | 20  | 65.0% | 60.1  | 10.0% | 10.0% | 0.0% | 0.0% | 0.0% | 0.0% |
| 45 to 64 years | Laparoscopic rectal procedure                                                                                         | 20  | 65.0% | 189.8 | 20.0% | 5.0%  | 0.0% | 0.0% | 0.0% | 0.0% |
| 45 to 64 years | Diaphragmatic repair                                                                                                  | 18  | 72.2% | 204.1 | 16.7% | 5.6%  | 0.0% | 0.0% | 0.0% | 0.0% |
| 45 to 64 years | Revision (including removal) of prosthetic vaginal graft - laparoscopic                                               | 18  | 72.2% | 224.9 | 16.7% | 0.0%  | 0.0% | 0.0% | 0.0% | 0.0% |
| 45 to 64 years | Closure of rectovesical fistula                                                                                       | 17  | 76.5% | 176.8 | 17.6% | 5.9%  | 0.0% | 0.0% | 0.0% | 0.0% |
| 45 to 64 years | Excision of lactiferous duct fistula                                                                                  | 16  | 81.3% | 121.6 | 6.3%  | 6.3%  | 0.0% | 0.0% | 0.0% | 0.0% |
| 45 to 64 years | Surgical closure tracheostomy or fistula, with or without plastic repair                                              | 44  | 27.3% | 45.9  | 6.8%  | 2.3%  | 0.0% | 0.0% | 0.0% | 0.0% |
| 45 to 64 years | Revision of gastric restrictive procedure for morbid obesity, other than adjustable gastric restrictive device - open | 26  | 46.2% | 215.6 | 11.5% | 0.0%  | 0.0% | 0.0% | 0.0% | 0.0% |
| 45 to 64 years | Excision of lesion or tumor, dentoalveolar structures                                                                 | 22  | 54.5% | 41.4  | 4.5%  | 4.5%  | 0.0% | 0.0% | 0.0% | 0.0% |
| 45 to 64 years | Removal of peritoneal foreign body from peritoneal cavity                                                             | 22  | 54.5% | 168.3 | 22.7% | 4.5%  | 0.0% | 0.0% | 0.0% | 0.0% |
| 45 to 64 years | Facelift                                                                                                              | 19  | 63.2% | 160.0 | 10.5% | 5.3%  | 0.0% | 0.0% | 0.0% | 0.0% |
| 45 to 64 years | Implantation or replacement of electromagnetic bone conduction hearing device in temporal bone                        | 18  | 66.7% | 111.5 | 5.6%  | 5.6%  | 0.0% | 0.0% | 0.0% | 0.0% |
| 45 to 64 years | Laparoscopic biliary procedure                                                                                        | 18  | 66.7% | 88.3  | 11.1% | 11.1% | 0.0% | 0.0% | 0.0% | 0.0% |

|                |                                                                                                       |     |       |       |       |       |      |      |      |      |
|----------------|-------------------------------------------------------------------------------------------------------|-----|-------|-------|-------|-------|------|------|------|------|
| 45 to 64 years | Exclusion or fulguration of urethra                                                                   | 53  | 20.8% | 36.7  | 3.8%  | 0.0%  | 0.0% | 0.0% | 0.0% | 0.0% |
| 45 to 64 years | Repair of eye laceration                                                                              | 46  | 23.9% | 77.9  | 6.5%  | 2.2%  | 0.0% | 0.0% | 0.0% | 0.0% |
| 45 to 64 years | Construction of tracheoesophageal fistula and subsequent insertion of an alaryngeal speech prosthesis | 43  | 25.6% | 22.2  | 2.3%  | 4.7%  | 0.0% | 0.0% | 0.0% | 0.0% |
| 45 to 64 years | Intestinal procedure, repair                                                                          | 28  | 39.3% | 62.8  | 14.3% | 7.1%  | 0.0% | 0.0% | 0.0% | 0.0% |
| 45 to 64 years | Exploration, retroperitoneal area with or without biopsy(s)                                           | 23  | 47.8% | 87.8  | 13.0% | 4.3%  | 0.0% | 0.0% | 0.0% | 0.0% |
| 45 to 64 years | Revision of gastroduodenal or gastrojejunal anastomosis                                               | 23  | 47.8% | 201.1 | 13.0% | 13.0% | 0.0% | 0.0% | 0.0% | 0.0% |
| 45 to 64 years | Gastrojejunostomy                                                                                     | 22  | 50.0% | 139.3 | 36.4% | 9.1%  | 0.0% | 0.0% | 0.0% | 0.0% |
| 45 to 64 years | Syndactylization, toes                                                                                | 22  | 50.0% | 185.2 | 4.5%  | 0.0%  | 0.0% | 0.0% | 0.0% | 0.0% |
| 45 to 64 years | Capsulorrhaphy, shoulder                                                                              | 20  | 55.0% | 264.3 | 10.0% | 5.0%  | 0.0% | 0.0% | 0.0% | 0.0% |
| 45 to 64 years | Open treatment of spinal fracture                                                                     | 17  | 64.7% | 175.7 | 23.5% | 5.9%  | 0.0% | 0.0% | 0.0% | 0.0% |
| 45 to 64 years | Division of sternocleidomastoid                                                                       | 16  | 68.8% | 56.9  | 0.0%  | 0.0%  | 0.0% | 0.0% | 0.0% | 0.0% |
| 45 to 64 years | Twist drill hole for subdural, intracerebral, or ventricular puncture                                 | 29  | 34.5% | 85.2  | 3.4%  | 3.4%  | 0.0% | 0.0% | 0.0% | 0.0% |
| 45 to 64 years | Reconstruction of dislocating patella                                                                 | 25  | 40.0% | 139.8 | 20.0% | 4.0%  | 0.0% | 0.0% | 0.0% | 0.0% |
| 45 to 64 years | Ureterotomy                                                                                           | 25  | 40.0% | 241.6 | 16.0% | 4.0%  | 0.0% | 0.0% | 0.0% | 0.0% |
| 45 to 64 years | Non-surgical repair of anal or anorectal fistula                                                      | 17  | 58.8% | 93.7  | 5.9%  | 5.9%  | 0.0% | 0.0% | 0.0% | 0.0% |
| 45 to 64 years | Radial styloidectomy                                                                                  | 17  | 58.8% | 327.4 | 11.8% | 5.9%  | 0.0% | 0.0% | 0.0% | 0.0% |
| 45 to 64 years | Placement of enterostomy or cecostomy, tube open                                                      | 16  | 62.5% | 132.8 | 37.5% | 12.5% | 0.0% | 0.0% | 0.0% | 0.0% |
| 45 to 64 years | Labyrinthectomy                                                                                       | 14  | 71.4% | 137.0 | 0.0%  | 14.3% | 0.0% | 0.0% | 0.0% | 0.0% |
| 45 to 64 years | Release of intrinsic muscles of hand                                                                  | 14  | 71.4% | 120.9 | 28.6% | 14.3% | 0.0% | 0.0% | 0.0% | 0.0% |
| 45 to 64 years | Vasovasostomy, vasovasorrhaphy                                                                        | 11  | 90.9% | 111.4 | 0.0%  | 0.0%  | 0.0% | 0.0% | 0.0% | 0.0% |
| 45 to 64 years | Fistulization of sclera for glaucoma                                                                  | 282 | 3.2%  | 6.5   | 0.0%  | 0.0%  | 0.0% | 0.0% | 0.0% | 0.0% |
| 45 to 64 years | Revision or repair of operative wound of anterior segment of eye                                      | 198 | 4.5%  | 8.5   | 0.0%  | 0.0%  | 0.0% | 0.0% | 0.0% | 0.0% |
| 45 to 64 years | Reconstruction of external auditory canal                                                             | 31  | 29.0% | 23.7  | 0.0%  | 0.0%  | 0.0% | 0.0% | 0.0% | 0.0% |
| 45 to 64 years | Resection of scrotum                                                                                  | 26  | 34.6% | 29.2  | 0.0%  | 0.0%  | 0.0% | 0.0% | 0.0% | 0.0% |
| 45 to 64 years | Excision of tendon, hand                                                                              | 25  | 36.0% | 102.1 | 4.0%  | 4.0%  | 0.0% | 0.0% | 0.0% | 0.0% |
| 45 to 64 years | Suture of mesentery                                                                                   | 22  | 40.9% | 58.4  | 9.1%  | 0.0%  | 0.0% | 0.0% | 0.0% | 0.0% |
| 45 to 64 years | Filletted finger or toe flap, including preparation of recipient site                                 | 18  | 50.0% | 70.8  | 0.0%  | 0.0%  | 0.0% | 0.0% | 0.0% | 0.0% |
| 45 to 64 years | Medianstintomy                                                                                        | 18  | 50.0% | 73.5  | 11.1% | 5.6%  | 0.0% | 0.0% | 0.0% | 0.0% |
| 45 to 64 years | Autologous chondrocyte implantation, knee                                                             | 16  | 56.3% | 123.4 | 25.0% | 0.0%  | 0.0% | 0.0% | 0.0% | 0.0% |
| 45 to 64 years | Excision of Meckel's diverticulum or omphalomesenteric duct                                           | 16  | 56.3% | 66.2  | 6.3%  | 6.3%  | 0.0% | 0.0% | 0.0% | 0.0% |
| 45 to 64 years | Prophylactic treatment (nailing, pinning, plating or wiring) of bone, upper extremity                 | 16  | 56.3% | 110.2 | 25.0% | 0.0%  | 0.0% | 0.0% | 0.0% | 0.0% |

|                |                                                                                                   |    |        |       |       |       |      |      |      |      |
|----------------|---------------------------------------------------------------------------------------------------|----|--------|-------|-------|-------|------|------|------|------|
| 45 to 64 years | Excision of radial head                                                                           | 13 | 69.2%  | 159.2 | 38.5% | 7.7%  | 0.0% | 0.0% | 0.0% | 0.0% |
| 45 to 64 years | Excision of urachal cyst or sinus                                                                 | 13 | 69.2%  | 77.7  | 7.7%  | 0.0%  | 0.0% | 0.0% | 0.0% | 0.0% |
| 45 to 64 years | Resection of pharyngeal wall                                                                      | 12 | 75.0%  | 457.5 | 25.0% | 0.0%  | 0.0% | 0.0% | 0.0% | 0.0% |
| 45 to 64 years | Implantation, replacement, revision, removal of gastric neurostimulator electrodes - laparoscopic | 11 | 81.8%  | 186.2 | 9.1%  | 9.1%  | 0.0% | 0.0% | 0.0% | 0.0% |
| 45 to 64 years | Resection of recurrent ovarian, tubal, primary peritoneal, uterine malignancy                     | 20 | 40.0%  | 98.5  | 15.0% | 0.0%  | 0.0% | 0.0% | 0.0% | 0.0% |
| 45 to 64 years | Corpora cavernosa shunts fore priapism                                                            | 19 | 42.1%  | 32.1  | 0.0%  | 5.3%  | 0.0% | 0.0% | 0.0% | 0.0% |
| 45 to 64 years | Anoplasty                                                                                         | 16 | 50.0%  | 82.5  | 12.5% | 0.0%  | 0.0% | 0.0% | 0.0% | 0.0% |
| 45 to 64 years | Diverticulectomy of hypopharynx or esophagus                                                      | 14 | 57.1%  | 229.5 | 21.4% | 0.0%  | 0.0% | 0.0% | 0.0% | 0.0% |
| 45 to 64 years | Reconstruction of vena cava, any method                                                           | 13 | 61.5%  | 95.4  | 15.4% | 0.0%  | 0.0% | 0.0% | 0.0% | 0.0% |
| 45 to 64 years | Removal of prosthesis, shoulder                                                                   | 13 | 61.5%  | 141.5 | 53.8% | 23.1% | 0.0% | 0.0% | 0.0% | 0.0% |
| 45 to 64 years | Excision of extraparenchymal lesion of testis                                                     | 12 | 66.7%  | 192.3 | 16.7% | 0.0%  | 0.0% | 0.0% | 0.0% | 0.0% |
| 45 to 64 years | Pericardiectomy                                                                                   | 12 | 66.7%  | 96.9  | 8.3%  | 0.0%  | 0.0% | 0.0% | 0.0% | 0.0% |
| 45 to 64 years | Transfer of tendon of fingers                                                                     | 12 | 66.7%  | 132.1 | 25.0% | 8.3%  | 0.0% | 0.0% | 0.0% | 0.0% |
| 45 to 64 years | Direct repair of aneurysm, pseudoaneurysm, or excision, lower extremity                           | 11 | 72.7%  | 279.8 | 9.1%  | 0.0%  | 0.0% | 0.0% | 0.0% | 0.0% |
| 45 to 64 years | Laparoscopic transection of vagus nerves                                                          | 11 | 72.7%  | 182.6 | 27.3% | 18.2% | 0.0% | 0.0% | 0.0% | 0.0% |
| 45 to 64 years | Pyloroplasty                                                                                      | 8  | 100.0% | 127.3 | 37.5% | 0.0%  | 0.0% | 0.0% | 0.0% | 0.0% |
| 45 to 64 years | Pericardial drainage                                                                              | 82 | 8.5%   | 16.6  | 4.9%  | 1.2%  | 0.0% | 0.0% | 0.0% | 0.0% |
| 45 to 64 years | Cardiac procedure, unlisted                                                                       | 23 | 30.4%  | 56.4  | 4.3%  | 4.3%  | 0.0% | 0.0% | 0.0% | 0.0% |
| 45 to 64 years | Canthopexy                                                                                        | 22 | 31.8%  | 23.9  | 0.0%  | 0.0%  | 0.0% | 0.0% | 0.0% | 0.0% |
| 45 to 64 years | Vestibuloplasty                                                                                   | 20 | 35.0%  | 49.9  | 5.0%  | 0.0%  | 0.0% | 0.0% | 0.0% | 0.0% |
| 45 to 64 years | Removal of implant from finger or hand                                                            | 18 | 38.9%  | 54.5  | 0.0%  | 5.6%  | 0.0% | 0.0% | 0.0% | 0.0% |
| 45 to 64 years | Paravaginal defect repair - open                                                                  | 17 | 41.2%  | 62.6  | 17.6% | 11.8% | 0.0% | 0.0% | 0.0% | 0.0% |
| 45 to 64 years | Tracheotomy, with or without lymph node dissection                                                | 17 | 41.2%  | 152.1 | 5.9%  | 0.0%  | 0.0% | 0.0% | 0.0% | 0.0% |
| 45 to 64 years | Omentectomy, epiploectomy, resection of omentum                                                   | 15 | 46.7%  | 76.0  | 6.7%  | 13.3% | 0.0% | 0.0% | 0.0% | 0.0% |
| 45 to 64 years | Excision of osseous tuberosities, dentoalveolar structures                                        | 13 | 53.8%  | 41.9  | 23.1% | 23.1% | 0.0% | 0.0% | 0.0% | 0.0% |
| 45 to 64 years | Thoracoscopy, with sympathectomy                                                                  | 13 | 53.8%  | 95.8  | 15.4% | 0.0%  | 0.0% | 0.0% | 0.0% | 0.0% |
| 45 to 64 years | Plastic operation of penis for injury                                                             | 12 | 58.3%  | 95.8  | 0.0%  | 0.0%  | 0.0% | 0.0% | 0.0% | 0.0% |
| 45 to 64 years | Transoral approach to skull base, brain stem or upper spinal cord for biopsy                      | 12 | 58.3%  | 150.6 | 25.0% | 0.0%  | 0.0% | 0.0% | 0.0% | 0.0% |
| 45 to 64 years | Tendon lengthening or shortening, upper extremity                                                 | 11 | 63.6%  | 413.0 | 9.1%  | 0.0%  | 0.0% | 0.0% | 0.0% | 0.0% |
| 45 to 64 years | Excision of lesion of tongue                                                                      | 10 | 70.0%  | 99.8  | 0.0%  | 0.0%  | 0.0% | 0.0% | 0.0% | 0.0% |
| 45 to 64 years | Pulmonary valve repair/replacement - open                                                         | 10 | 70.0%  | 105.8 | 20.0% | 0.0%  | 0.0% | 0.0% | 0.0% | 0.0% |
| 45 to 64 years | Diaphragmatic hernia repair (other than neonatal)                                                 | 9  | 77.8%  | 148.6 | 11.1% | 0.0%  | 0.0% | 0.0% | 0.0% | 0.0% |

|                |                                                                                                      |     |        |       |       |       |      |      |      |      |
|----------------|------------------------------------------------------------------------------------------------------|-----|--------|-------|-------|-------|------|------|------|------|
| 45 to 64 years | Excision of aural glomus tumor                                                                       | 9   | 77.8%  | 53.9  | 0.0%  | 0.0%  | 0.0% | 0.0% | 0.0% | 0.0% |
| 45 to 64 years | Excision or unroofing of cyst(s) of kidney                                                           | 8   | 87.5%  | 109.1 | 0.0%  | 12.5% | 0.0% | 0.0% | 0.0% | 0.0% |
| 45 to 64 years | Urethrectomy, total, including cystostomy                                                            | 8   | 87.5%  | 187.5 | 12.5% | 12.5% | 0.0% | 0.0% | 0.0% | 0.0% |
| 45 to 64 years | Revision of aqueous shunt to extraocular equatorial plate reservoir                                  | 59  | 10.2%  | 29.8  | 5.1%  | 3.4%  | 0.0% | 0.0% | 0.0% | 0.0% |
| 45 to 64 years | Intestinal procedure, excision of lesion without anastomosis, exteriorization or fistulization       | 25  | 24.0%  | 43.6  | 4.0%  | 4.0%  | 0.0% | 0.0% | 0.0% | 0.0% |
| 45 to 64 years | Tracheostoma revision                                                                                | 21  | 28.6%  | 103.1 | 14.3% | 9.5%  | 0.0% | 0.0% | 0.0% | 0.0% |
| 45 to 64 years | Frenoplasty                                                                                          | 18  | 33.3%  | 34.4  | 0.0%  | 0.0%  | 0.0% | 0.0% | 0.0% | 0.0% |
| 45 to 64 years | Excision of frenum, labial or buccal                                                                 | 16  | 37.5%  | 40.9  | 12.5% | 0.0%  | 0.0% | 0.0% | 0.0% | 0.0% |
| 45 to 64 years | Tissue expander placement, excluding breast                                                          | 16  | 37.5%  | 68.9  | 12.5% | 0.0%  | 0.0% | 0.0% | 0.0% | 0.0% |
| 45 to 64 years | Ovarian cystectomy                                                                                   | 15  | 40.0%  | 62.7  | 6.7%  | 0.0%  | 0.0% | 0.0% | 0.0% | 0.0% |
| 45 to 64 years | Laparotomy                                                                                           | 14  | 42.9%  | 167.3 | 7.1%  | 7.1%  | 0.0% | 0.0% | 0.0% | 0.0% |
| 45 to 64 years | Enterotomy                                                                                           | 13  | 46.2%  | 50.2  | 23.1% | 15.4% | 0.0% | 0.0% | 0.0% | 0.0% |
| 45 to 64 years | Intestinal procedure, resection and enterostomy                                                      | 13  | 46.2%  | 276.1 | 15.4% | 15.4% | 0.0% | 0.0% | 0.0% | 0.0% |
| 45 to 64 years | Insertion of orbital implant                                                                         | 12  | 50.0%  | 67.9  | 8.3%  | 8.3%  | 0.0% | 0.0% | 0.0% | 0.0% |
| 45 to 64 years | Amputation of penis                                                                                  | 11  | 54.5%  | 60.0  | 9.1%  | 9.1%  | 0.0% | 0.0% | 0.0% | 0.0% |
| 45 to 64 years | Pancreatic cyst or psuedocyst repair                                                                 | 11  | 54.5%  | 110.5 | 27.3% | 0.0%  | 0.0% | 0.0% | 0.0% | 0.0% |
| 45 to 64 years | Removal of synthetic rod and insertion of tendon graft in hand or finger                             | 11  | 54.5%  | 91.6  | 18.2% | 0.0%  | 0.0% | 0.0% | 0.0% | 0.0% |
| 45 to 64 years | Repair of arteriovenous fistula, congenital                                                          | 11  | 54.5%  | 43.6  | 0.0%  | 0.0%  | 0.0% | 0.0% | 0.0% | 0.0% |
| 45 to 64 years | Revision of femoral anastomosis of synthetic arterial bypass graft in groin                          | 11  | 54.5%  | 299.3 | 36.4% | 18.2% | 0.0% | 0.0% | 0.0% | 0.0% |
| 45 to 64 years | Transfer external oblique muscle to greater trochanter including fascial or tendon extension (graft) | 10  | 60.0%  | 139.5 | 20.0% | 10.0% | 0.0% | 0.0% | 0.0% | 0.0% |
| 45 to 64 years | Arthroscopy of hand                                                                                  | 9   | 66.7%  | 77.8  | 22.2% | 11.1% | 0.0% | 0.0% | 0.0% | 0.0% |
| 45 to 64 years | Esophagogastric fundoplasty                                                                          | 9   | 66.7%  | 119.3 | 33.3% | 11.1% | 0.0% | 0.0% | 0.0% | 0.0% |
| 45 to 64 years | Excision of presacral or sacrococcygeal tumor                                                        | 9   | 66.7%  | 192.5 | 33.3% | 0.0%  | 0.0% | 0.0% | 0.0% | 0.0% |
| 45 to 64 years | Creation of shunt, lumbar, subarachnoid-peritoneal, -pleural, or other; with or without laminectomy  | 8   | 75.0%  | 272.5 | 25.0% | 0.0%  | 0.0% | 0.0% | 0.0% | 0.0% |
| 45 to 64 years | Coronoidectomy                                                                                       | 7   | 85.7%  | 87.9  | 14.3% | 0.0%  | 0.0% | 0.0% | 0.0% | 0.0% |
| 45 to 64 years | Repair of anomalous coronary artery from pulmonary artery origin                                     | 7   | 85.7%  | 156.8 | 14.3% | 14.3% | 0.0% | 0.0% | 0.0% | 0.0% |
| 45 to 64 years | Decompression of internal auditory canal                                                             | 6   | 100.0% | 110.4 | 0.0%  | 16.7% | 0.0% | 0.0% | 0.0% | 0.0% |
| 45 to 64 years | Injection of medication or other substance into Tenon's capsule                                      | 777 | 0.6%   | 2.6   | 0.3%  | 0.0%  | 0.0% | 0.0% | 0.0% | 0.0% |
| 45 to 64 years | Follicle puncture for oocyte retrieval                                                               | 199 | 2.5%   | 1.6   | 0.0%  | 0.0%  | 0.0% | 0.0% | 0.0% | 0.0% |
| 45 to 64 years | Cardiac ablation                                                                                     | 74  | 6.8%   | 22.3  | 1.4%  | 1.4%  | 0.0% | 0.0% | 0.0% | 0.0% |
| 45 to 64 years | Reconstruction of eyelid                                                                             | 25  | 20.0%  | 18.8  | 0.0%  | 4.0%  | 0.0% | 0.0% | 0.0% | 0.0% |

|                |                                                                                 |    |       |       |       |       |      |      |      |      |
|----------------|---------------------------------------------------------------------------------|----|-------|-------|-------|-------|------|------|------|------|
| 45 to 64 years | Excision of exostosis(es), external auditory canal                              | 23 | 21.7% | 12.6  | 0.0%  | 0.0%  | 0.0% | 0.0% | 0.0% | 0.0% |
| 45 to 64 years | Hypophysectomy or excision of pituitary tumor                                   | 22 | 22.7% | 39.4  | 0.0%  | 0.0%  | 0.0% | 0.0% | 0.0% | 0.0% |
| 45 to 64 years | Repair of dural/cerebrospinal fluid leak or pseudomeningocele, with laminectomy | 14 | 35.7% | 156.8 | 7.1%  | 0.0%  | 0.0% | 0.0% | 0.0% | 0.0% |
| 45 to 64 years | Removal of esophageal sphincter augmentation device                             | 11 | 45.5% | 140.7 | 9.1%  | 0.0%  | 0.0% | 0.0% | 0.0% | 0.0% |
| 45 to 64 years | Revision of tracheostomy scar                                                   | 11 | 45.5% | 39.8  | 9.1%  | 9.1%  | 0.0% | 0.0% | 0.0% | 0.0% |
| 45 to 64 years | Heart transplant                                                                | 10 | 50.0% | 61.8  | 20.0% | 0.0%  | 0.0% | 0.0% | 0.0% | 0.0% |
| 45 to 64 years | Lung transplant                                                                 | 10 | 50.0% | 94.0  | 30.0% | 0.0%  | 0.0% | 0.0% | 0.0% | 0.0% |
| 45 to 64 years | Elevation of depressed skull fracture                                           | 9  | 55.6% | 277.5 | 11.1% | 0.0%  | 0.0% | 0.0% | 0.0% | 0.0% |
| 45 to 64 years | Ligation or transection of fallopian tube(s)                                    | 9  | 55.6% | 286.9 | 0.0%  | 0.0%  | 0.0% | 0.0% | 0.0% | 0.0% |
| 45 to 64 years | Removal of transplanted renal allograft                                         | 9  | 55.6% | 91.7  | 0.0%  | 0.0%  | 0.0% | 0.0% | 0.0% | 0.0% |
| 45 to 64 years | Rhinectomy                                                                      | 9  | 55.6% | 116.9 | 22.2% | 0.0%  | 0.0% | 0.0% | 0.0% | 0.0% |
| 45 to 64 years | Excision of lesion of palate, uvula                                             | 8  | 62.5% | 151.9 | 12.5% | 0.0%  | 0.0% | 0.0% | 0.0% | 0.0% |
| 45 to 64 years | Laparoscopic uterine procedure                                                  | 8  | 62.5% | 39.8  | 0.0%  | 0.0%  | 0.0% | 0.0% | 0.0% | 0.0% |
| 45 to 64 years | Thoracotomy, with control of traumatic hemorrhage and/or repair of lung tear    | 8  | 62.5% | 148.1 | 50.0% | 0.0%  | 0.0% | 0.0% | 0.0% | 0.0% |
| 45 to 64 years | Pterygomaxillary fossa surgery                                                  | 7  | 71.4% | 59.6  | 28.6% | 0.0%  | 0.0% | 0.0% | 0.0% | 0.0% |
| 45 to 64 years | Resection of mediastinal cyst                                                   | 7  | 71.4% | 178.6 | 0.0%  | 0.0%  | 0.0% | 0.0% | 0.0% | 0.0% |
| 45 to 64 years | Thoracoscopy, with pleurectomy                                                  | 7  | 71.4% | 385.7 | 14.3% | 0.0%  | 0.0% | 0.0% | 0.0% | 0.0% |
| 45 to 64 years | Temporary closure of eyelids by suture                                          | 54 | 7.4%  | 9.1   | 0.0%  | 1.9%  | 0.0% | 0.0% | 0.0% | 0.0% |
| 45 to 64 years | Reconstruction of fingertip                                                     | 28 | 14.3% | 17.5  | 3.6%  | 0.0%  | 0.0% | 0.0% | 0.0% | 0.0% |
| 45 to 64 years | Trachelorrhaphy, plastic repair of uterine cervix, vaginal approach             | 20 | 20.0% | 17.3  | 0.0%  | 0.0%  | 0.0% | 0.0% | 0.0% | 0.0% |
| 45 to 64 years | Osteoplasty of facial bones                                                     | 15 | 26.7% | 24.5  | 13.3% | 0.0%  | 0.0% | 0.0% | 0.0% | 0.0% |
| 45 to 64 years | Excision of lesion of tendon sheath, forearm and/or wrist                       | 14 | 28.6% | 41.6  | 7.1%  | 7.1%  | 0.0% | 0.0% | 0.0% | 0.0% |
| 45 to 64 years | Hyoid myotomy and suspension                                                    | 13 | 30.8% | 77.5  | 7.7%  | 7.7%  | 0.0% | 0.0% | 0.0% | 0.0% |
| 45 to 64 years | Excision of carotid body tumor                                                  | 12 | 33.3% | 34.6  | 0.0%  | 0.0%  | 0.0% | 0.0% | 0.0% | 0.0% |
| 45 to 64 years | Ectopic pregnancy surgery                                                       | 10 | 40.0% | 34.0  | 0.0%  | 0.0%  | 0.0% | 0.0% | 0.0% | 0.0% |
| 45 to 64 years | Excision of tendon of hand or finger                                            | 10 | 40.0% | 108.8 | 0.0%  | 0.0%  | 0.0% | 0.0% | 0.0% | 0.0% |
| 45 to 64 years | Removal of ankle implant                                                        | 10 | 40.0% | 56.3  | 10.0% | 0.0%  | 0.0% | 0.0% | 0.0% | 0.0% |
| 45 to 64 years | Repair of atrial and/or ventricular septal defects                              | 10 | 40.0% | 77.9  | 0.0%  | 0.0%  | 0.0% | 0.0% | 0.0% | 0.0% |
| 45 to 64 years | Drainage of salivary gland abscess                                              | 8  | 50.0% | 121.9 | 0.0%  | 0.0%  | 0.0% | 0.0% | 0.0% | 0.0% |
| 45 to 64 years | Osteotomy of facial bones                                                       | 8  | 50.0% | 65.9  | 0.0%  | 0.0%  | 0.0% | 0.0% | 0.0% | 0.0% |
| 45 to 64 years | Repair of dural/cerebrospinal fluid leak, not requiring laminectomy             | 8  | 50.0% | 165.0 | 25.0% | 0.0%  | 0.0% | 0.0% | 0.0% | 0.0% |
| 45 to 64 years | Vesicourethropexy or urethropexy, anterior                                      | 8  | 50.0% | 71.9  | 0.0%  | 12.5% | 0.0% | 0.0% | 0.0% | 0.0% |

|                |                                                                                                |     |        |       |       |       |      |      |      |      |
|----------------|------------------------------------------------------------------------------------------------|-----|--------|-------|-------|-------|------|------|------|------|
| 45 to 64 years | Colotomy                                                                                       | 7   | 57.1%  | 55.7  | 0.0%  | 0.0%  | 0.0% | 0.0% | 0.0% | 0.0% |
| 45 to 64 years | Division of stricture of rectum                                                                | 7   | 57.1%  | 40.7  | 0.0%  | 0.0%  | 0.0% | 0.0% | 0.0% | 0.0% |
| 45 to 64 years | Excision of lesion of pancreas (eg, cyst, adenoma)                                             | 7   | 57.1%  | 100.7 | 0.0%  | 0.0%  | 0.0% | 0.0% | 0.0% | 0.0% |
| 45 to 64 years | Laparoscopic renal procedure                                                                   | 7   | 57.1%  | 61.4  | 0.0%  | 0.0%  | 0.0% | 0.0% | 0.0% | 0.0% |
| 45 to 64 years | Salpingectomy                                                                                  | 7   | 57.1%  | 104.3 | 14.3% | 0.0%  | 0.0% | 0.0% | 0.0% | 0.0% |
| 45 to 64 years | Thoracotomy, with exploration                                                                  | 7   | 57.1%  | 114.3 | 42.9% | 0.0%  | 0.0% | 0.0% | 0.0% | 0.0% |
| 45 to 64 years | Thoracotomy, with resection-plication of bullae, includes any pleural procedure when performed | 7   | 57.1%  | 102.1 | 14.3% | 0.0%  | 0.0% | 0.0% | 0.0% | 0.0% |
| 45 to 64 years | Condylectomy of temporomandibular joint                                                        | 6   | 66.7%  | 103.3 | 33.3% | 0.0%  | 0.0% | 0.0% | 0.0% | 0.0% |
| 45 to 64 years | Control of nasopharyngeal or oropharyngeal hemorrhage                                          | 6   | 66.7%  | 106.7 | 16.7% | 0.0%  | 0.0% | 0.0% | 0.0% | 0.0% |
| 45 to 64 years | Epiphyseal or hemiepiphyseal arrest, lower extremity                                           | 6   | 66.7%  | 187.3 | 16.7% | 0.0%  | 0.0% | 0.0% | 0.0% | 0.0% |
| 45 to 64 years | Excision of cystic hygroma                                                                     | 6   | 66.7%  | 65.8  | 0.0%  | 0.0%  | 0.0% | 0.0% | 0.0% | 0.0% |
| 45 to 64 years | Intestinal procedure, lysis of adhesions                                                       | 6   | 66.7%  | 65.8  | 0.0%  | 16.7% | 0.0% | 0.0% | 0.0% | 0.0% |
| 45 to 64 years | Tracheoplasty                                                                                  | 6   | 66.7%  | 187.5 | 16.7% | 33.3% | 0.0% | 0.0% | 0.0% | 0.0% |
| 45 to 64 years | Ventriculocisternostomy, third ventricle                                                       | 6   | 66.7%  | 126.7 | 16.7% | 16.7% | 0.0% | 0.0% | 0.0% | 0.0% |
| 45 to 64 years | Closure of cystostomy                                                                          | 5   | 80.0%  | 126.0 | 0.0%  | 20.0% | 0.0% | 0.0% | 0.0% | 0.0% |
| 45 to 64 years | Closure of ureterocutaneous fistula                                                            | 5   | 80.0%  | 304.5 | 40.0% | 20.0% | 0.0% | 0.0% | 0.0% | 0.0% |
| 45 to 64 years | Facial nerve reconstruction or repair                                                          | 5   | 80.0%  | 355.0 | 20.0% | 0.0%  | 0.0% | 0.0% | 0.0% | 0.0% |
| 45 to 64 years | Laparoscopic ovarian procedure                                                                 | 5   | 80.0%  | 68.0  | 0.0%  | 0.0%  | 0.0% | 0.0% | 0.0% | 0.0% |
| 45 to 64 years | Pyeloplasty                                                                                    | 5   | 80.0%  | 122.0 | 40.0% | 20.0% | 0.0% | 0.0% | 0.0% | 0.0% |
| 45 to 64 years | Cardiotomy, exploratory                                                                        | 4   | 100.0% | 197.5 | 25.0% | 0.0%  | 0.0% | 0.0% | 0.0% | 0.0% |
| 45 to 64 years | Epiglottidectomy                                                                               | 4   | 100.0% | 206.3 | 0.0%  | 0.0%  | 0.0% | 0.0% | 0.0% | 0.0% |
| 45 to 64 years | Intestinal procedure, excision of ileoanal reservoir with ileostomy                            | 4   | 100.0% | 234.4 | 75.0% | 25.0% | 0.0% | 0.0% | 0.0% | 0.0% |
| 45 to 64 years | Laparoscopic testicular procedure                                                              | 4   | 100.0% | 109.4 | 25.0% | 0.0%  | 0.0% | 0.0% | 0.0% | 0.0% |
| 45 to 64 years | Myocardial resection                                                                           | 4   | 100.0% | 263.8 | 0.0%  | 0.0%  | 0.0% | 0.0% | 0.0% | 0.0% |
| 45 to 64 years | Ureteroplasty                                                                                  | 4   | 100.0% | 158.8 | 0.0%  | 0.0%  | 0.0% | 0.0% | 0.0% | 0.0% |
| 45 to 64 years | Thrombectomy or thrombolysis, percutaneous intracranial                                        | 144 | 2.1%   | 9.4   | 0.0%  | 0.0%  | 0.0% | 0.0% | 0.0% | 0.0% |
| 45 to 64 years | Removal of lens material                                                                       | 79  | 3.8%   | 4.4   | 1.3%  | 1.3%  | 0.0% | 0.0% | 0.0% | 0.0% |
| 45 to 64 years | Multiple punctures of anterior cornea (eg, for corneal erosion, tattoo)                        | 35  | 8.6%   | 19.4  | 0.0%  | 2.9%  | 0.0% | 0.0% | 0.0% | 0.0% |
| 45 to 64 years | Correction of lagophthalmos                                                                    | 15  | 20.0%  | 125.1 | 6.7%  | 0.0%  | 0.0% | 0.0% | 0.0% | 0.0% |
| 45 to 64 years | Drainage of retroperitoneal abscess - open                                                     | 11  | 27.3%  | 38.6  | 9.1%  | 0.0%  | 0.0% | 0.0% | 0.0% | 0.0% |
| 45 to 64 years | Laparoscopic appendix procedure                                                                | 11  | 27.3%  | 30.0  | 0.0%  | 0.0%  | 0.0% | 0.0% | 0.0% | 0.0% |
| 45 to 64 years | Revision of cranial neurostimulator pulse generator or receiver                                | 11  | 27.3%  | 28.6  | 0.0%  | 0.0%  | 0.0% | 0.0% | 0.0% | 0.0% |

|                |                                                                                |     |        |       |       |       |      |      |      |      |
|----------------|--------------------------------------------------------------------------------|-----|--------|-------|-------|-------|------|------|------|------|
| 45 to 64 years | Excision of pelvic pressure ulcer                                              | 10  | 30.0%  | 26.8  | 10.0% | 0.0%  | 0.0% | 0.0% | 0.0% | 0.0% |
| 45 to 64 years | Endovascular repair of iliac artery                                            | 8   | 37.5%  | 39.4  | 12.5% | 0.0%  | 0.0% | 0.0% | 0.0% | 0.0% |
| 45 to 64 years | Excision tracheal stenosis and anastomosis                                     | 8   | 37.5%  | 69.4  | 12.5% | 0.0%  | 0.0% | 0.0% | 0.0% | 0.0% |
| 45 to 64 years | Genioplasty                                                                    | 8   | 37.5%  | 90.6  | 12.5% | 0.0%  | 0.0% | 0.0% | 0.0% | 0.0% |
| 45 to 64 years | Pelvic exenteration                                                            | 8   | 37.5%  | 101.3 | 12.5% | 12.5% | 0.0% | 0.0% | 0.0% | 0.0% |
| 45 to 64 years | Pharyngoplasty                                                                 | 8   | 37.5%  | 51.3  | 0.0%  | 0.0%  | 0.0% | 0.0% | 0.0% | 0.0% |
| 45 to 64 years | Removal of hip prosthesis                                                      | 8   | 37.5%  | 145.9 | 25.0% | 0.0%  | 0.0% | 0.0% | 0.0% | 0.0% |
| 45 to 64 years | Abdominal wall repair, dehiscence                                              | 7   | 42.9%  | 93.2  | 14.3% | 0.0%  | 0.0% | 0.0% | 0.0% | 0.0% |
| 45 to 64 years | Acetabuloplasty                                                                | 7   | 42.9%  | 83.6  | 0.0%  | 0.0%  | 0.0% | 0.0% | 0.0% | 0.0% |
| 45 to 64 years | Colpoperineorrhaphy                                                            | 7   | 42.9%  | 65.4  | 14.3% | 14.3% | 0.0% | 0.0% | 0.0% | 0.0% |
| 45 to 64 years | Gender affirming procedure, male to female                                     | 7   | 42.9%  | 849.3 | 14.3% | 0.0%  | 0.0% | 0.0% | 0.0% | 0.0% |
| 45 to 64 years | Insertion of testicular prosthesis                                             | 7   | 42.9%  | 68.2  | 14.3% | 14.3% | 0.0% | 0.0% | 0.0% | 0.0% |
| 45 to 64 years | Excision of vaginal septum                                                     | 6   | 50.0%  | 81.7  | 0.0%  | 16.7% | 0.0% | 0.0% | 0.0% | 0.0% |
| 45 to 64 years | Insertion of ventricular assist device                                         | 6   | 50.0%  | 127.5 | 16.7% | 0.0%  | 0.0% | 0.0% | 0.0% | 0.0% |
| 45 to 64 years | Laparoscopic urethral suspension for stress incontinence                       | 6   | 50.0%  | 80.0  | 0.0%  | 0.0%  | 0.0% | 0.0% | 0.0% | 0.0% |
| 45 to 64 years | Laryngotomy                                                                    | 6   | 50.0%  | 91.7  | 33.3% | 16.7% | 0.0% | 0.0% | 0.0% | 0.0% |
| 45 to 64 years | Nephrolithotomy                                                                | 6   | 50.0%  | 56.3  | 16.7% | 0.0%  | 0.0% | 0.0% | 0.0% | 0.0% |
| 45 to 64 years | Repair of syndactyly                                                           | 6   | 50.0%  | 56.3  | 0.0%  | 0.0%  | 0.0% | 0.0% | 0.0% | 0.0% |
| 45 to 64 years | Exenteration of orbit                                                          | 5   | 60.0%  | 76.0  | 60.0% | 0.0%  | 0.0% | 0.0% | 0.0% | 0.0% |
| 45 to 64 years | Nasal septum reconstruction                                                    | 5   | 60.0%  | 50.0  | 0.0%  | 20.0% | 0.0% | 0.0% | 0.0% | 0.0% |
| 45 to 64 years | Pyloromyotomy, cutting of pyloric muscle (Fredet-Ramstedt type operation)      | 5   | 60.0%  | 44.0  | 0.0%  | 40.0% | 0.0% | 0.0% | 0.0% | 0.0% |
| 45 to 64 years | Esophagomyotomy                                                                | 4   | 75.0%  | 102.5 | 0.0%  | 0.0%  | 0.0% | 0.0% | 0.0% | 0.0% |
| 45 to 64 years | Implantation of artificial heart                                               | 4   | 75.0%  | 65.0  | 0.0%  | 0.0%  | 0.0% | 0.0% | 0.0% | 0.0% |
| 45 to 64 years | Removal of entire lumbosubarachnoid shunt system without replacement           | 4   | 75.0%  | 144.4 | 25.0% | 25.0% | 0.0% | 0.0% | 0.0% | 0.0% |
| 45 to 64 years | Plastic operation on urethral sphincter, vaginal approach                      | 3   | 100.0% | 126.7 | 66.7% | 0.0%  | 0.0% | 0.0% | 0.0% | 0.0% |
| 45 to 64 years | Exchange of intraocular lens                                                   | 178 | 1.1%   | 1.3   | 0.0%  | 0.0%  | 0.0% | 0.0% | 0.0% | 0.0% |
| 45 to 64 years | Repositioning of intraocular lens prosthesis, requiring an incision            | 64  | 3.1%   | 1.4   | 0.0%  | 1.6%  | 0.0% | 0.0% | 0.0% | 0.0% |
| 45 to 64 years | Transcatheter mitral valve repair                                              | 40  | 5.0%   | 13.3  | 2.5%  | 2.5%  | 0.0% | 0.0% | 0.0% | 0.0% |
| 45 to 64 years | Severing adhesions of anterior segment of eye                                  | 36  | 5.6%   | 3.1   | 0.0%  | 0.0%  | 0.0% | 0.0% | 0.0% | 0.0% |
| 45 to 64 years | Iridectomy, with corneoscleral or corneal section                              | 30  | 6.7%   | 3.7   | 0.0%  | 0.0%  | 0.0% | 0.0% | 0.0% | 0.0% |
| 45 to 64 years | Construction of intermarginal adhesions, median tarsorrhaphy, or canthorrhaphy | 28  | 7.1%   | 4.0   | 0.0%  | 0.0%  | 0.0% | 0.0% | 0.0% | 0.0% |
| 45 to 64 years | Transcatheter placement of intravascular stent(s), intracranial                | 25  | 8.0%   | 8.8   | 0.0%  | 0.0%  | 0.0% | 0.0% | 0.0% | 0.0% |



|                |                                                                                                  |    |       |       |       |       |      |      |      |      |
|----------------|--------------------------------------------------------------------------------------------------|----|-------|-------|-------|-------|------|------|------|------|
| 45 to 64 years | Implantation of intrastromal corneal ring segments                                               | 24 | 8.3%  | 3.8   | 4.2%  | 0.0%  | 0.0% | 0.0% | 0.0% | 0.0% |
| 45 to 64 years | Laparoscopic esophagus procedure                                                                 | 17 | 11.8% | 21.8  | 5.9%  | 0.0%  | 0.0% | 0.0% | 0.0% | 0.0% |
| 45 to 64 years | Laryngectomy, pharyngectomy, pharyngolaryngectomy                                                | 11 | 18.2% | 57.3  | 18.2% | 0.0%  | 0.0% | 0.0% | 0.0% | 0.0% |
| 45 to 64 years | Removal or revision of orbital implant                                                           | 10 | 20.0% | 11.5  | 0.0%  | 0.0%  | 0.0% | 0.0% | 0.0% | 0.0% |
| 45 to 64 years | Stereotactic implantation of depth electrodes into the cerebrum for long-term seizure monitoring | 10 | 20.0% | 18.5  | 0.0%  | 0.0%  | 0.0% | 0.0% | 0.0% | 0.0% |
| 45 to 64 years | Operative tissue ablation and reconstruction of atria - open                                     | 9  | 22.2% | 58.3  | 11.1% | 0.0%  | 0.0% | 0.0% | 0.0% | 0.0% |
| 45 to 64 years | Vermilionectomy, with mucosal advancement                                                        | 9  | 22.2% | 31.7  | 0.0%  | 11.1% | 0.0% | 0.0% | 0.0% | 0.0% |
| 45 to 64 years | Thoracoscopy, creation of pericardial window                                                     | 8  | 25.0% | 51.3  | 25.0% | 0.0%  | 0.0% | 0.0% | 0.0% | 0.0% |
| 45 to 64 years | Debridement of shoulder                                                                          | 7  | 28.6% | 27.9  | 0.0%  | 0.0%  | 0.0% | 0.0% | 0.0% | 0.0% |
| 45 to 64 years | Sympathectomy                                                                                    | 7  | 28.6% | 35.4  | 14.3% | 0.0%  | 0.0% | 0.0% | 0.0% | 0.0% |
| 45 to 64 years | Hypospadias repair                                                                               | 6  | 33.3% | 48.3  | 0.0%  | 0.0%  | 0.0% | 0.0% | 0.0% | 0.0% |
| 45 to 64 years | Septal or other intranasal dermatoplasty                                                         | 6  | 33.3% | 23.3  | 0.0%  | 0.0%  | 0.0% | 0.0% | 0.0% | 0.0% |
| 45 to 64 years | Transrectal drainage of pelvic abscess                                                           | 6  | 33.3% | 37.5  | 0.0%  | 0.0%  | 0.0% | 0.0% | 0.0% | 0.0% |
| 45 to 64 years | Ureterolithotomy - laparoscopic                                                                  | 6  | 33.3% | 75.0  | 0.0%  | 0.0%  | 0.0% | 0.0% | 0.0% | 0.0% |
| 45 to 64 years | Insertion of peritoneal-venous shunt                                                             | 5  | 40.0% | 52.5  | 0.0%  | 0.0%  | 0.0% | 0.0% | 0.0% | 0.0% |
| 45 to 64 years | Intestinal procedure, strictuloplasty                                                            | 5  | 40.0% | 32.5  | 20.0% | 0.0%  | 0.0% | 0.0% | 0.0% | 0.0% |
| 45 to 64 years | Release or recession, hamstring, proximal                                                        | 5  | 40.0% | 85.0  | 0.0%  | 0.0%  | 0.0% | 0.0% | 0.0% | 0.0% |
| 45 to 64 years | Removal of foreign body, shoulder                                                                | 5  | 40.0% | 19.0  | 0.0%  | 0.0%  | 0.0% | 0.0% | 0.0% | 0.0% |
| 45 to 64 years | Removal or repair of electromagnetic bone conduction hearing device in temporal bone             | 5  | 40.0% | 30.0  | 0.0%  | 0.0%  | 0.0% | 0.0% | 0.0% | 0.0% |
| 45 to 64 years | Repair of choanal atresia                                                                        | 5  | 40.0% | 52.0  | 0.0%  | 0.0%  | 0.0% | 0.0% | 0.0% | 0.0% |
| 45 to 64 years | Replacement, irrigation or revision of lumbosubarachnoid shunt                                   | 5  | 40.0% | 90.0  | 20.0% | 0.0%  | 0.0% | 0.0% | 0.0% | 0.0% |
| 45 to 64 years | Revision of urinary-cutaneous anastomosis                                                        | 5  | 40.0% | 19.5  | 0.0%  | 0.0%  | 0.0% | 0.0% | 0.0% | 0.0% |
| 45 to 64 years | Transfer of iliopsoas to femur                                                                   | 5  | 40.0% | 120.0 | 0.0%  | 0.0%  | 0.0% | 0.0% | 0.0% | 0.0% |
| 45 to 64 years | Ureteroureterostomy                                                                              | 5  | 40.0% | 27.0  | 0.0%  | 0.0%  | 0.0% | 0.0% | 0.0% | 0.0% |
| 45 to 64 years | Augmentation of mandibular body or angle                                                         | 4  | 50.0% | 225.0 | 0.0%  | 0.0%  | 0.0% | 0.0% | 0.0% | 0.0% |
| 45 to 64 years | Drainage of subdiaphragmatic or subphrenic abscess - open                                        | 4  | 50.0% | 35.0  | 0.0%  | 0.0%  | 0.0% | 0.0% | 0.0% | 0.0% |
| 45 to 64 years | Nephrostomy and/or nephrotomy                                                                    | 4  | 50.0% | 75.0  | 0.0%  | 0.0%  | 0.0% | 0.0% | 0.0% | 0.0% |
| 45 to 64 years | Repair of ileoanal pouch fistula/sinus                                                           | 4  | 50.0% | 62.5  | 0.0%  | 0.0%  | 0.0% | 0.0% | 0.0% | 0.0% |
| 45 to 64 years | Uterine suspension                                                                               | 4  | 50.0% | 60.0  | 25.0% | 0.0%  | 0.0% | 0.0% | 0.0% | 0.0% |
| 45 to 64 years | Atrial septectomy or septostomy                                                                  | 3  | 66.7% | 83.3  | 33.3% | 0.0%  | 0.0% | 0.0% | 0.0% | 0.0% |
| 45 to 64 years | Hernia repair, lumbar                                                                            | 3  | 66.7% | 75.0  | 0.0%  | 0.0%  | 0.0% | 0.0% | 0.0% | 0.0% |
| 45 to 64 years | Laparoscopic fimbrioplasty                                                                       | 3  | 66.7% | 78.3  | 0.0%  | 0.0%  | 0.0% | 0.0% | 0.0% | 0.0% |

|                |                                                                                           |    |        |       |        |       |      |      |      |      |
|----------------|-------------------------------------------------------------------------------------------|----|--------|-------|--------|-------|------|------|------|------|
| 45 to 64 years | Marsupialization of cyst or abscess of liver                                              | 3  | 66.7%  | 42.5  | 66.7%  | 0.0%  | 0.0% | 0.0% | 0.0% | 0.0% |
| 45 to 64 years | Pulmonary endarterectomy                                                                  | 3  | 66.7%  | 225.0 | 33.3%  | 0.0%  | 0.0% | 0.0% | 0.0% | 0.0% |
| 45 to 64 years | Reduction of torsion of testis                                                            | 3  | 66.7%  | 658.3 | 33.3%  | 0.0%  | 0.0% | 0.0% | 0.0% | 0.0% |
| 45 to 64 years | Removal of epithelial downgrowth, anterior chamber of eye                                 | 3  | 66.7%  | 48.3  | 33.3%  | 0.0%  | 0.0% | 0.0% | 0.0% | 0.0% |
| 45 to 64 years | Removal or revision of sling for male urinary incontinence (eg, fascia or synthetic)      | 3  | 66.7%  | 910.0 | 33.3%  | 0.0%  | 0.0% | 0.0% | 0.0% | 0.0% |
| 45 to 64 years | Suture or repair of testicular injury                                                     | 3  | 66.7%  | 80.0  | 0.0%   | 0.0%  | 0.0% | 0.0% | 0.0% | 0.0% |
| 45 to 64 years | Repair of inflatable urethral/bladder neck sphincter, including pump, reservoir, and cuff | 2  | 100.0% | 217.5 | 0.0%   | 0.0%  | 0.0% | 0.0% | 0.0% | 0.0% |
| 45 to 64 years | Sequestrectomy of shoulder                                                                | 2  | 100.0% | 277.5 | 50.0%  | 50.0% | 0.0% | 0.0% | 0.0% | 0.0% |
| 45 to 64 years | Suture of esophageal wound or injury                                                      | 2  | 100.0% | 915.0 | 100.0% | 0.0%  | 0.0% | 0.0% | 0.0% | 0.0% |
| 45 to 64 years | Ureteroenterostomy                                                                        | 2  | 100.0% | 225.0 | 50.0%  | 0.0%  | 0.0% | 0.0% | 0.0% | 0.0% |
| 45 to 64 years | Repair of symblepharon                                                                    | 13 | 7.7%   | 5.8   | 7.7%   | 0.0%  | 0.0% | 0.0% | 0.0% | 0.0% |
| 45 to 64 years | Paracentesis of anterior chamber of eye                                                   | 12 | 8.3%   | 25.0  | 0.0%   | 0.0%  | 0.0% | 0.0% | 0.0% | 0.0% |
| 45 to 64 years | Implantation of chemotherapy device                                                       | 11 | 9.1%   | 8.2   | 0.0%   | 0.0%  | 0.0% | 0.0% | 0.0% | 0.0% |
| 45 to 64 years | Excision of lacrimal gland or lacrimal gland tumor                                        | 8  | 12.5%  | 12.5  | 0.0%   | 0.0%  | 0.0% | 0.0% | 0.0% | 0.0% |
| 45 to 64 years | Lymphangiectomy or other operations on lymphatic channels                                 | 8  | 12.5%  | 9.4   | 0.0%   | 0.0%  | 0.0% | 0.0% | 0.0% | 0.0% |
| 45 to 64 years | Plastic repair of introitus                                                               | 8  | 12.5%  | 7.5   | 0.0%   | 0.0%  | 0.0% | 0.0% | 0.0% | 0.0% |
| 45 to 64 years | Cricopharyngeal myotomy                                                                   | 7  | 14.3%  | 5.4   | 0.0%   | 0.0%  | 0.0% | 0.0% | 0.0% | 0.0% |
| 45 to 64 years | Optic nerve decompression                                                                 | 7  | 14.3%  | 30.0  | 14.3%  | 0.0%  | 0.0% | 0.0% | 0.0% | 0.0% |
| 45 to 64 years | Removal of vitreous, anterior approach                                                    | 7  | 14.3%  | 10.7  | 0.0%   | 0.0%  | 0.0% | 0.0% | 0.0% | 0.0% |
| 45 to 64 years | Drainage of perirenal or renal abscess - open                                             | 6  | 16.7%  | 24.2  | 0.0%   | 0.0%  | 0.0% | 0.0% | 0.0% | 0.0% |
| 45 to 64 years | Reconstruction of wrist                                                                   | 6  | 16.7%  | 12.5  | 0.0%   | 0.0%  | 0.0% | 0.0% | 0.0% | 0.0% |
| 45 to 64 years | Excision of tonsil tags                                                                   | 5  | 20.0%  | 30.0  | 0.0%   | 0.0%  | 0.0% | 0.0% | 0.0% | 0.0% |
| 45 to 64 years | Liver debridement                                                                         | 5  | 20.0%  | 15.0  | 0.0%   | 0.0%  | 0.0% | 0.0% | 0.0% | 0.0% |
| 45 to 64 years | Removal of prosthesis, upper extremity                                                    | 5  | 20.0%  | 45.0  | 0.0%   | 20.0% | 0.0% | 0.0% | 0.0% | 0.0% |
| 45 to 64 years | Replantation, upper extremity                                                             | 5  | 20.0%  | 15.0  | 0.0%   | 0.0%  | 0.0% | 0.0% | 0.0% | 0.0% |
| 45 to 64 years | Arterial transposition                                                                    | 4  | 25.0%  | 150.0 | 0.0%   | 0.0%  | 0.0% | 0.0% | 0.0% | 0.0% |
| 45 to 64 years | Duodenotomy                                                                               | 4  | 25.0%  | 37.5  | 0.0%   | 0.0%  | 0.0% | 0.0% | 0.0% | 0.0% |
| 45 to 64 years | Excision of cervical stump                                                                | 4  | 25.0%  | 45.0  | 25.0%  | 0.0%  | 0.0% | 0.0% | 0.0% | 0.0% |
| 45 to 64 years | Incision and drainage of abscess; retropharyngeal or parapharyngeal                       | 4  | 25.0%  | 22.5  | 0.0%   | 0.0%  | 0.0% | 0.0% | 0.0% | 0.0% |
| 45 to 64 years | Insertion of ocular implants                                                              | 4  | 25.0%  | 7.9   | 0.0%   | 0.0%  | 0.0% | 0.0% | 0.0% | 0.0% |
| 45 to 64 years | Revision of stapedectomy or stapedotomy                                                   | 4  | 25.0%  | 18.8  | 0.0%   | 0.0%  | 0.0% | 0.0% | 0.0% | 0.0% |
| 45 to 64 years | Sesamoidectomy, thumb or finger                                                           | 4  | 25.0%  | 15.0  | 0.0%   | 0.0%  | 0.0% | 0.0% | 0.0% | 0.0% |
| 45 to 64 years | Application of halo, including removal                                                    | 3  | 33.3%  | 50.0  | 0.0%   | 0.0%  | 0.0% | 0.0% | 0.0% | 0.0% |

|                |                                                                                                                      |   |        |       |        |       |      |      |      |      |
|----------------|----------------------------------------------------------------------------------------------------------------------|---|--------|-------|--------|-------|------|------|------|------|
| 45 to 64 years | Closure of salivary fistula                                                                                          | 3 | 33.3%  | 125.0 | 0.0%   | 0.0%  | 0.0% | 0.0% | 0.0% | 0.0% |
| 45 to 64 years | Creation of lesion by stereotactic method                                                                            | 3 | 33.3%  | 25.0  | 0.0%   | 0.0%  | 0.0% | 0.0% | 0.0% | 0.0% |
| 45 to 64 years | Fixation of contralateral testis                                                                                     | 3 | 33.3%  | 50.0  | 33.3%  | 0.0%  | 0.0% | 0.0% | 0.0% | 0.0% |
| 45 to 64 years | Insertion of subcutaneous reservoir, pump or continuous infusion system for connection to ventricular catheter (CNS) | 3 | 33.3%  | 70.0  | 0.0%   | 33.3% | 0.0% | 0.0% | 0.0% | 0.0% |
| 45 to 64 years | Insertion of vascular pedicle into carpal bone (eg, Hori procedure)                                                  | 3 | 33.3%  | 33.3  | 0.0%   | 0.0%  | 0.0% | 0.0% | 0.0% | 0.0% |
| 45 to 64 years | Osteotomy of spine                                                                                                   | 3 | 33.3%  | 200.0 | 0.0%   | 0.0%  | 0.0% | 0.0% | 0.0% | 0.0% |
| 45 to 64 years | Palatoplasty                                                                                                         | 3 | 33.3%  | 75.0  | 0.0%   | 0.0%  | 0.0% | 0.0% | 0.0% | 0.0% |
| 45 to 64 years | Reconstructive repair of pectus excavatum or carinatum                                                               | 3 | 33.3%  | 75.0  | 33.3%  | 0.0%  | 0.0% | 0.0% | 0.0% | 0.0% |
| 45 to 64 years | Renal exploration                                                                                                    | 3 | 33.3%  | 75.0  | 0.0%   | 0.0%  | 0.0% | 0.0% | 0.0% | 0.0% |
| 45 to 64 years | Transcatheter placement of intravascular stent - open                                                                | 3 | 33.3%  | 50.0  | 0.0%   | 33.3% | 0.0% | 0.0% | 0.0% | 0.0% |
| 45 to 64 years | Transplantation of pancreas                                                                                          | 3 | 33.3%  | 50.0  | 0.0%   | 0.0%  | 0.0% | 0.0% | 0.0% | 0.0% |
| 45 to 64 years | Urethrorrhaphy                                                                                                       | 3 | 33.3%  | 33.3  | 0.0%   | 33.3% | 0.0% | 0.0% | 0.0% | 0.0% |
| 45 to 64 years | Cricotracheal resection                                                                                              | 2 | 50.0%  | 37.5  | 0.0%   | 0.0%  | 0.0% | 0.0% | 0.0% | 0.0% |
| 45 to 64 years | Epididymovasostomy, anastomosis of epididymis to vas deferens                                                        | 2 | 50.0%  | 500.0 | 0.0%   | 0.0%  | 0.0% | 0.0% | 0.0% | 0.0% |
| 45 to 64 years | Hand, cross intrinsic transfer                                                                                       | 2 | 50.0%  | 281.3 | 50.0%  | 0.0%  | 0.0% | 0.0% | 0.0% | 0.0% |
| 45 to 64 years | Major reconstruction, chest wall                                                                                     | 2 | 50.0%  | 210.0 | 50.0%  | 0.0%  | 0.0% | 0.0% | 0.0% | 0.0% |
| 45 to 64 years | Marsupialization of urethral diverticulum, male or female                                                            | 2 | 50.0%  | 37.5  | 0.0%   | 0.0%  | 0.0% | 0.0% | 0.0% | 0.0% |
| 45 to 64 years | Occlusion of fallopian tube(s) by device                                                                             | 2 | 50.0%  | 75.0  | 0.0%   | 0.0%  | 0.0% | 0.0% | 0.0% | 0.0% |
| 45 to 64 years | Osteotomy of pelvis                                                                                                  | 2 | 50.0%  | 96.0  | 0.0%   | 50.0% | 0.0% | 0.0% | 0.0% | 0.0% |
| 45 to 64 years | Removal of ocular implant                                                                                            | 2 | 50.0%  | 30.0  | 0.0%   | 0.0%  | 0.0% | 0.0% | 0.0% | 0.0% |
| 45 to 64 years | Repair of encephalocele, skull vault, including cranioplasty                                                         | 2 | 50.0%  | 72.5  | 0.0%   | 0.0%  | 0.0% | 0.0% | 0.0% | 0.0% |
| 45 to 64 years | Resection of apical lung tumor                                                                                       | 2 | 50.0%  | 450.0 | 50.0%  | 0.0%  | 0.0% | 0.0% | 0.0% | 0.0% |
| 45 to 64 years | Resection or incision of subvalvular tissue for discrete subvalvular aortic stenosis                                 | 2 | 50.0%  | 75.0  | 0.0%   | 0.0%  | 0.0% | 0.0% | 0.0% | 0.0% |
| 45 to 64 years | Thoracoscopy, control of hemorrhage                                                                                  | 2 | 50.0%  | 112.5 | 0.0%   | 0.0%  | 0.0% | 0.0% | 0.0% | 0.0% |
| 45 to 64 years | Thoracostomy, chest drainage with rib resection or flap                                                              | 2 | 50.0%  | 140.0 | 50.0%  | 0.0%  | 0.0% | 0.0% | 0.0% | 0.0% |
| 45 to 64 years | Thoracotomy, for postoperative complications                                                                         | 2 | 50.0%  | 105.0 | 0.0%   | 0.0%  | 0.0% | 0.0% | 0.0% | 0.0% |
| 45 to 64 years | Arthrotomy of temporomandibular joint                                                                                | 1 | 100.0% | 90.0  | 0.0%   | 0.0%  | 0.0% | 0.0% | 0.0% | 0.0% |
| 45 to 64 years | Chest wall reconstruction                                                                                            | 1 | 100.0% | 600.0 | 0.0%   | 0.0%  | 0.0% | 0.0% | 0.0% | 0.0% |
| 45 to 64 years | Closure of postauricular fistula, mastoid                                                                            | 1 | 100.0% | 750.0 | 0.0%   | 0.0%  | 0.0% | 0.0% | 0.0% | 0.0% |
| 45 to 64 years | Endovascular access                                                                                                  | 1 | 100.0% | 150.0 | 100.0% | 0.0%  | 0.0% | 0.0% | 0.0% | 0.0% |
| 45 to 64 years | Excision of ampulla of Vater                                                                                         | 1 | 100.0% | 60.0  | 0.0%   | 0.0%  | 0.0% | 0.0% | 0.0% | 0.0% |

|                |                                                                                            |     |        |        |        |      |      |      |      |      |
|----------------|--------------------------------------------------------------------------------------------|-----|--------|--------|--------|------|------|------|------|------|
| 45 to 64 years | Gingivoplasty                                                                              | 1   | 100.0% | 150.0  | 0.0%   | 0.0% | 0.0% | 0.0% | 0.0% | 0.0% |
| 45 to 64 years | Induced abortion                                                                           | 1   | 100.0% | 75.0   | 0.0%   | 0.0% | 0.0% | 0.0% | 0.0% | 0.0% |
| 45 to 64 years | Laparoscopic endocrine procedure                                                           | 1   | 100.0% | 112.5  | 0.0%   | 0.0% | 0.0% | 0.0% | 0.0% | 0.0% |
| 45 to 64 years | Pericardiotomy for removal of clot or foreign body                                         | 1   | 100.0% | 450.0  | 0.0%   | 0.0% | 0.0% | 0.0% | 0.0% | 0.0% |
| 45 to 64 years | Pyelotomy                                                                                  | 1   | 100.0% | 70.0   | 0.0%   | 0.0% | 0.0% | 0.0% | 0.0% | 0.0% |
| 45 to 64 years | Repair of cardiac wound                                                                    | 1   | 100.0% | 200.0  | 100.0% | 0.0% | 0.0% | 0.0% | 0.0% | 0.0% |
| 45 to 64 years | Repair of complex cardiac anomalies                                                        | 1   | 100.0% | 100.0  | 0.0%   | 0.0% | 0.0% | 0.0% | 0.0% | 0.0% |
| 45 to 64 years | Repair of postinfarction ventricular septal defect                                         | 1   | 100.0% | 210.0  | 0.0%   | 0.0% | 0.0% | 0.0% | 0.0% | 0.0% |
| 45 to 64 years | Repair of round window fistula                                                             | 1   | 100.0% | 112.5  | 0.0%   | 0.0% | 0.0% | 0.0% | 0.0% | 0.0% |
| 45 to 64 years | Replacement of all or part of ureter by intestine segment, including intestine anastomosis | 1   | 100.0% | 1350.0 | 100.0% | 0.0% | 0.0% | 0.0% | 0.0% | 0.0% |
| 45 to 64 years | Revision of lower extremity arterial bypass                                                | 1   | 100.0% | 300.0  | 100.0% | 0.0% | 0.0% | 0.0% | 0.0% | 0.0% |
| 45 to 64 years | Surgical ventricular restoration procedure                                                 | 1   | 100.0% | 225.0  | 0.0%   | 0.0% | 0.0% | 0.0% | 0.0% | 0.0% |
| 45 to 64 years | Suture and/or ligation of thoracic duct                                                    | 1   | 100.0% | 225.0  | 0.0%   | 0.0% | 0.0% | 0.0% | 0.0% | 0.0% |
| 45 to 64 years | Thrombectomy                                                                               | 1   | 100.0% | 500.0  | 0.0%   | 0.0% | 0.0% | 0.0% | 0.0% | 0.0% |
| 45 to 64 years | Transplantation of testis(es) to thigh                                                     | 1   | 100.0% | 225.0  | 100.0% | 0.0% | 0.0% | 0.0% | 0.0% | 0.0% |
| 45 to 64 years | Urinary undiversion                                                                        | 1   | 100.0% | 75.0   | 0.0%   | 0.0% | 0.0% | 0.0% | 0.0% | 0.0% |
| 45 to 64 years | Venous bypass, lower extremity                                                             | 1   | 100.0% | 150.0  | 100.0% | 0.0% | 0.0% | 0.0% | 0.0% | 0.0% |
| 45 to 64 years | Embryo transfer, intrauterine                                                              | 342 | 0.0%   | 0.0    | 0.0%   | 0.0% | 0.0% | 0.0% | 0.0% | 0.0% |
| 45 to 64 years | Goniotomy                                                                                  | 119 | 0.0%   | 0.0    | 0.0%   | 0.0% | 0.0% | 0.0% | 0.0% | 0.0% |
| 45 to 64 years | Placement of needle for intraosseous infusion                                              | 56  | 0.0%   | 0.0    | 0.0%   | 0.0% | 0.0% | 0.0% | 0.0% | 0.0% |
| 45 to 64 years | Insertion of intraocular lens prosthesis, not associated with concurrent cataract removal  | 40  | 0.0%   | 0.0    | 0.0%   | 0.0% | 0.0% | 0.0% | 0.0% | 0.0% |
| 45 to 64 years | Removal of foreign body, intraocular                                                       | 20  | 0.0%   | 0.0    | 0.0%   | 0.0% | 0.0% | 0.0% | 0.0% | 0.0% |
| 45 to 64 years | Cerclage of cervix, during pregnancy                                                       | 16  | 0.0%   | 0.0    | 0.0%   | 0.0% | 0.0% | 0.0% | 0.0% | 0.0% |
| 45 to 64 years | Transcatheter pulmonary valve implantation                                                 | 16  | 0.0%   | 0.0    | 0.0%   | 0.0% | 0.0% | 0.0% | 0.0% | 0.0% |
| 45 to 64 years | Corneal relaxing incision for correction of surgically induced astigmatism                 | 15  | 0.0%   | 0.0    | 0.0%   | 0.0% | 0.0% | 0.0% | 0.0% | 0.0% |
| 45 to 64 years | Aspiration or release of vitreous, subretinal or choroidal fluid, pars plana approach      | 13  | 0.0%   | 0.0    | 0.0%   | 0.0% | 0.0% | 0.0% | 0.0% | 0.0% |
| 45 to 64 years | Severing adhesions of anterior segment of eye, laser                                       | 13  | 0.0%   | 0.0    | 0.0%   | 0.0% | 0.0% | 0.0% | 0.0% | 0.0% |
| 45 to 64 years | Venous bypass, abdominal - open                                                            | 13  | 0.0%   | 0.0    | 0.0%   | 0.0% | 0.0% | 0.0% | 0.0% | 0.0% |
| 45 to 64 years | Scleral reinforcement                                                                      | 10  | 0.0%   | 0.0    | 0.0%   | 0.0% | 0.0% | 0.0% | 0.0% | 0.0% |
| 45 to 64 years | Repair of iris, ciliary body                                                               | 8   | 0.0%   | 0.0    | 0.0%   | 0.0% | 0.0% | 0.0% | 0.0% | 0.0% |
| 45 to 64 years | Excision of lesion, conjunctiva                                                            | 7   | 0.0%   | 0.0    | 0.0%   | 0.0% | 0.0% | 0.0% | 0.0% | 0.0% |
| 45 to 64 years | Suture of iris, ciliary body                                                               | 7   | 0.0%   | 0.0    | 0.0%   | 0.0% | 0.0% | 0.0% | 0.0% | 0.0% |
| 45 to 64 years | Angioplasty, intracranial - percutaneous                                                   | 6   | 0.0%   | 0.0    | 0.0%   | 0.0% | 0.0% | 0.0% | 0.0% | 0.0% |

|                |                                                                                             |   |      |     |      |      |      |      |      |      |
|----------------|---------------------------------------------------------------------------------------------|---|------|-----|------|------|------|------|------|------|
| 45 to 64 years | Release of extensive scar tissue without detaching extraocular muscle (separate procedure)  | 5 | 0.0% | 0.0 | 0.0% | 0.0% | 0.0% | 0.0% | 0.0% | 0.0% |
| 45 to 64 years | Colpocleisis (Le Fort type)                                                                 | 4 | 0.0% | 0.0 | 0.0% | 0.0% | 0.0% | 0.0% | 0.0% | 0.0% |
| 45 to 64 years | Denervation of hip joint                                                                    | 4 | 0.0% | 0.0 | 0.0% | 0.0% | 0.0% | 0.0% | 0.0% | 0.0% |
| 45 to 64 years | Implantation of intravitreal drug delivery system, includes concomitant removal of vitreous | 4 | 0.0% | 0.0 | 0.0% | 0.0% | 0.0% | 0.0% | 0.0% | 0.0% |
| 45 to 64 years | Excision of external ear                                                                    | 3 | 0.0% | 0.0 | 0.0% | 0.0% | 0.0% | 0.0% | 0.0% | 0.0% |
| 45 to 64 years | Excision of lesion of mesentery                                                             | 3 | 0.0% | 0.0 | 0.0% | 0.0% | 0.0% | 0.0% | 0.0% | 0.0% |
| 45 to 64 years | Lysis of adhesions (salpingolysis, ovariolysis)                                             | 3 | 0.0% | 0.0 | 0.0% | 0.0% | 0.0% | 0.0% | 0.0% | 0.0% |
| 45 to 64 years | Meniscectomy of temporomandibular joint                                                     | 3 | 0.0% | 0.0 | 0.0% | 0.0% | 0.0% | 0.0% | 0.0% | 0.0% |
| 45 to 64 years | Quadricepsplasty (eg, Bennett or Thompson type)                                             | 3 | 0.0% | 0.0 | 0.0% | 0.0% | 0.0% | 0.0% | 0.0% | 0.0% |
| 45 to 64 years | Thoracotomy, with cardiac massage                                                           | 3 | 0.0% | 0.0 | 0.0% | 0.0% | 0.0% | 0.0% | 0.0% | 0.0% |
| 45 to 64 years | Cleft lip repair                                                                            | 2 | 0.0% | 0.0 | 0.0% | 0.0% | 0.0% | 0.0% | 0.0% | 0.0% |
| 45 to 64 years | Cutaneous appendico-vesicostomy                                                             | 2 | 0.0% | 0.0 | 0.0% | 0.0% | 0.0% | 0.0% | 0.0% | 0.0% |
| 45 to 64 years | Cystoplasty or cystourethroplasty                                                           | 2 | 0.0% | 0.0 | 0.0% | 0.0% | 0.0% | 0.0% | 0.0% | 0.0% |
| 45 to 64 years | ECMO                                                                                        | 2 | 0.0% | 0.0 | 0.0% | 0.0% | 0.0% | 0.0% | 0.0% | 0.0% |
| 45 to 64 years | Excision of lacrimal sac                                                                    | 2 | 0.0% | 0.0 | 0.0% | 0.0% | 0.0% | 0.0% | 0.0% | 0.0% |
| 45 to 64 years | Excision of lesion, sclera                                                                  | 2 | 0.0% | 0.0 | 0.0% | 0.0% | 0.0% | 0.0% | 0.0% | 0.0% |
| 45 to 64 years | Excision of tracheal tumor or carcinoma                                                     | 2 | 0.0% | 0.0 | 0.0% | 0.0% | 0.0% | 0.0% | 0.0% | 0.0% |
| 45 to 64 years | Exploration, repair, and presacral drainage for rectal injury                               | 2 | 0.0% | 0.0 | 0.0% | 0.0% | 0.0% | 0.0% | 0.0% | 0.0% |
| 45 to 64 years | Extrapleural enucleation of empyema                                                         | 2 | 0.0% | 0.0 | 0.0% | 0.0% | 0.0% | 0.0% | 0.0% | 0.0% |
| 45 to 64 years | Gender affirming procedure, clitoroplasty                                                   | 2 | 0.0% | 0.0 | 0.0% | 0.0% | 0.0% | 0.0% | 0.0% | 0.0% |
| 45 to 64 years | Laparoscopic spleen procedure                                                               | 2 | 0.0% | 0.0 | 0.0% | 0.0% | 0.0% | 0.0% | 0.0% | 0.0% |
| 45 to 64 years | Laryngeal reinnervation by neuromuscular pedicle                                            | 2 | 0.0% | 0.0 | 0.0% | 0.0% | 0.0% | 0.0% | 0.0% | 0.0% |
| 45 to 64 years | Management of liver hemorrhage                                                              | 2 | 0.0% | 0.0 | 0.0% | 0.0% | 0.0% | 0.0% | 0.0% | 0.0% |
| 45 to 64 years | Osteoplasty of lower extremity                                                              | 2 | 0.0% | 0.0 | 0.0% | 0.0% | 0.0% | 0.0% | 0.0% | 0.0% |
| 45 to 64 years | Other tissue grafts                                                                         | 2 | 0.0% | 0.0 | 0.0% | 0.0% | 0.0% | 0.0% | 0.0% | 0.0% |
| 45 to 64 years | Ptosis correction                                                                           | 2 | 0.0% | 0.0 | 0.0% | 0.0% | 0.0% | 0.0% | 0.0% | 0.0% |
| 45 to 64 years | Removal of blood clot, anterior segment of eye                                              | 2 | 0.0% | 0.0 | 0.0% | 0.0% | 0.0% | 0.0% | 0.0% | 0.0% |
| 45 to 64 years | Removal of foreign body from deep penile tissue (eg, plastic implant)                       | 2 | 0.0% | 0.0 | 0.0% | 0.0% | 0.0% | 0.0% | 0.0% | 0.0% |
| 45 to 64 years | Sequestrectomy of bone in upper extremity                                                   | 2 | 0.0% | 0.0 | 0.0% | 0.0% | 0.0% | 0.0% | 0.0% | 0.0% |
| 45 to 64 years | Stapes mobilization                                                                         | 2 | 0.0% | 0.0 | 0.0% | 0.0% | 0.0% | 0.0% | 0.0% | 0.0% |
| 45 to 64 years | Thoracotomy, with removal of intrapleural foreign body or fibrin deposit                    | 2 | 0.0% | 0.0 | 0.0% | 0.0% | 0.0% | 0.0% | 0.0% | 0.0% |
| 45 to 64 years | Abdomino-vaginal vesical neck suspension                                                    | 1 | 0.0% | 0.0 | 0.0% | 0.0% | 0.0% | 0.0% | 0.0% | 0.0% |

|                |                                                                                                                                 |   |      |     |      |      |      |      |      |      |
|----------------|---------------------------------------------------------------------------------------------------------------------------------|---|------|-----|------|------|------|------|------|------|
| 45 to 64 years | Aortic root translocation with ventricular septal defect and pulmonary stenosis repair                                          | 1 | 0.0% | 0.0 | 0.0% | 0.0% | 0.0% | 0.0% | 0.0% | 0.0% |
| 45 to 64 years | Closure of esophagostomy or fistula                                                                                             | 1 | 0.0% | 0.0 | 0.0% | 0.0% | 0.0% | 0.0% | 0.0% | 0.0% |
| 45 to 64 years | Closure of gastrocolic fistula                                                                                                  | 1 | 0.0% | 0.0 | 0.0% | 0.0% | 0.0% | 0.0% | 0.0% | 0.0% |
| 45 to 64 years | Closure of nephrocutaneous or pyelocutaneous fistula                                                                            | 1 | 0.0% | 0.0 | 0.0% | 0.0% | 0.0% | 0.0% | 0.0% | 0.0% |
| 45 to 64 years | Coracoacromial ligament release                                                                                                 | 1 | 0.0% | 0.0 | 0.0% | 0.0% | 0.0% | 0.0% | 0.0% | 0.0% |
| 45 to 64 years | Corneal wedge resection for correction of surgically induced astigmatism                                                        | 1 | 0.0% | 0.0 | 0.0% | 0.0% | 0.0% | 0.0% | 0.0% | 0.0% |
| 45 to 64 years | Decompression of orbit only, transcranial approach                                                                              | 1 | 0.0% | 0.0 | 0.0% | 0.0% | 0.0% | 0.0% | 0.0% | 0.0% |
| 45 to 64 years | Disarticulation through wrist                                                                                                   | 1 | 0.0% | 0.0 | 0.0% | 0.0% | 0.0% | 0.0% | 0.0% | 0.0% |
| 45 to 64 years | Discission of secondary membranous cataract                                                                                     | 1 | 0.0% | 0.0 | 0.0% | 0.0% | 0.0% | 0.0% | 0.0% | 0.0% |
| 45 to 64 years | Drainage of extraperitoneal lymphocele to peritoneal cavity - open                                                              | 1 | 0.0% | 0.0 | 0.0% | 0.0% | 0.0% | 0.0% | 0.0% | 0.0% |
| 45 to 64 years | Drainage of ovarian cyst(s), abdominal approach                                                                                 | 1 | 0.0% | 0.0 | 0.0% | 0.0% | 0.0% | 0.0% | 0.0% | 0.0% |
| 45 to 64 years | Esophagostomy                                                                                                                   | 1 | 0.0% | 0.0 | 0.0% | 0.0% | 0.0% | 0.0% | 0.0% | 0.0% |
| 45 to 64 years | Excision of bile duct tumor                                                                                                     | 1 | 0.0% | 0.0 | 0.0% | 0.0% | 0.0% | 0.0% | 0.0% | 0.0% |
| 45 to 64 years | Excision of bulbourethral gland (Cowper's gland)                                                                                | 1 | 0.0% | 0.0 | 0.0% | 0.0% | 0.0% | 0.0% | 0.0% | 0.0% |
| 45 to 64 years | Exclusion of small intestine from pelvis by mesh or other prosthesis, or native tissue                                          | 1 | 0.0% | 0.0 | 0.0% | 0.0% | 0.0% | 0.0% | 0.0% | 0.0% |
| 45 to 64 years | Fertility procedures                                                                                                            | 1 | 0.0% | 0.0 | 0.0% | 0.0% | 0.0% | 0.0% | 0.0% | 0.0% |
| 45 to 64 years | Gastrointestinal reconstruction for previous esophagectomy                                                                      | 1 | 0.0% | 0.0 | 0.0% | 0.0% | 0.0% | 0.0% | 0.0% | 0.0% |
| 45 to 64 years | Hand, soft tissue reconstruction                                                                                                | 1 | 0.0% | 0.0 | 0.0% | 0.0% | 0.0% | 0.0% | 0.0% | 0.0% |
| 45 to 64 years | Implantation, replacement, revision, removal of gastric neurostimulator electrodes - open                                       | 1 | 0.0% | 0.0 | 0.0% | 0.0% | 0.0% | 0.0% | 0.0% | 0.0% |
| 45 to 64 years | Incision and drainage of appendiceal abscess - open                                                                             | 1 | 0.0% | 0.0 | 0.0% | 0.0% | 0.0% | 0.0% | 0.0% | 0.0% |
| 45 to 64 years | Incision of neck or thorax                                                                                                      | 1 | 0.0% | 0.0 | 0.0% | 0.0% | 0.0% | 0.0% | 0.0% | 0.0% |
| 45 to 64 years | Insertion of tandem cuff                                                                                                        | 1 | 0.0% | 0.0 | 0.0% | 0.0% | 0.0% | 0.0% | 0.0% | 0.0% |
| 45 to 64 years | Intestinal procedure, plication                                                                                                 | 1 | 0.0% | 0.0 | 0.0% | 0.0% | 0.0% | 0.0% | 0.0% | 0.0% |
| 45 to 64 years | Iridotomy by stab incision                                                                                                      | 1 | 0.0% | 0.0 | 0.0% | 0.0% | 0.0% | 0.0% | 0.0% | 0.0% |
| 45 to 64 years | Laparoscopic salpingostomy                                                                                                      | 1 | 0.0% | 0.0 | 0.0% | 0.0% | 0.0% | 0.0% | 0.0% | 0.0% |
| 45 to 64 years | Obliteration of carotid aneurysm, arteriovenous malformation, or carotid-cavernous fistula by dissection within cavernous sinus | 1 | 0.0% | 0.0 | 0.0% | 0.0% | 0.0% | 0.0% | 0.0% | 0.0% |
| 45 to 64 years | Pereyra procedure, including anterior colporrhaphy                                                                              | 1 | 0.0% | 0.0 | 0.0% | 0.0% | 0.0% | 0.0% | 0.0% | 0.0% |
| 45 to 64 years | Placement of drains, peripancreatic, for acute pancreatitis                                                                     | 1 | 0.0% | 0.0 | 0.0% | 0.0% | 0.0% | 0.0% | 0.0% | 0.0% |
| 45 to 64 years | Pulmonary artery embolectomy                                                                                                    | 1 | 0.0% | 0.0 | 0.0% | 0.0% | 0.0% | 0.0% | 0.0% | 0.0% |
| 45 to 64 years | Reconstruction of congenital hand polydactyly                                                                                   | 1 | 0.0% | 0.0 | 0.0% | 0.0% | 0.0% | 0.0% | 0.0% | 0.0% |
| 45 to 64 years | Removal of intestinal transplant                                                                                                | 1 | 0.0% | 0.0 | 0.0% | 0.0% | 0.0% | 0.0% | 0.0% | 0.0% |

|                |                                                                                                   |   |      |     |      |      |      |      |      |      |
|----------------|---------------------------------------------------------------------------------------------------|---|------|-----|------|------|------|------|------|------|
| 45 to 64 years | Removal of intra-aortic balloon assist device                                                     | 1 | 0.0% | 0.0 | 0.0% | 0.0% | 0.0% | 0.0% | 0.0% | 0.0% |
| 45 to 64 years | Removal of pancreatic transplant                                                                  | 1 | 0.0% | 0.0 | 0.0% | 0.0% | 0.0% | 0.0% | 0.0% | 0.0% |
| 45 to 64 years | Repair of anterior palate, including vomer flap                                                   | 1 | 0.0% | 0.0 | 0.0% | 0.0% | 0.0% | 0.0% | 0.0% | 0.0% |
| 45 to 64 years | Repair of coronary arteriovenous or arteriocardiac chamber fistula                                | 1 | 0.0% | 0.0 | 0.0% | 0.0% | 0.0% | 0.0% | 0.0% | 0.0% |
| 45 to 64 years | Repair of fascial defect of leg                                                                   | 1 | 0.0% | 0.0 | 0.0% | 0.0% | 0.0% | 0.0% | 0.0% | 0.0% |
| 45 to 64 years | Repair of nasolabial fistula                                                                      | 1 | 0.0% | 0.0 | 0.0% | 0.0% | 0.0% | 0.0% | 0.0% | 0.0% |
| 45 to 64 years | Repair of oval window fistula                                                                     | 1 | 0.0% | 0.0 | 0.0% | 0.0% | 0.0% | 0.0% | 0.0% | 0.0% |
| 45 to 64 years | Repair of scleral staphyloma                                                                      | 1 | 0.0% | 0.0 | 0.0% | 0.0% | 0.0% | 0.0% | 0.0% | 0.0% |
| 45 to 64 years | Repair of wound, extraocular muscle, tendon and/or Tenon's capsule                                | 1 | 0.0% | 0.0 | 0.0% | 0.0% | 0.0% | 0.0% | 0.0% | 0.0% |
| 45 to 64 years | Resection of pericardial cyst or tumor                                                            | 1 | 0.0% | 0.0 | 0.0% | 0.0% | 0.0% | 0.0% | 0.0% | 0.0% |
| 45 to 64 years | Resection or debridement of pancreas and peripancreatic tissue for acute necrotizing pancreatitis | 1 | 0.0% | 0.0 | 0.0% | 0.0% | 0.0% | 0.0% | 0.0% | 0.0% |
| 45 to 64 years | Shoulder contracture release                                                                      | 1 | 0.0% | 0.0 | 0.0% | 0.0% | 0.0% | 0.0% | 0.0% | 0.0% |
| 45 to 64 years | Thoracoscopy, evacuation of pericardium                                                           | 1 | 0.0% | 0.0 | 0.0% | 0.0% | 0.0% | 0.0% | 0.0% | 0.0% |
| 45 to 64 years | Thoracotomy, with open intrapleural pneumonolysis                                                 | 1 | 0.0% | 0.0 | 0.0% | 0.0% | 0.0% | 0.0% | 0.0% | 0.0% |
| 45 to 64 years | Trabeculectomy ab externo                                                                         | 1 | 0.0% | 0.0 | 0.0% | 0.0% | 0.0% | 0.0% | 0.0% | 0.0% |
| 45 to 64 years | Transduodenal sphincterotomy or sphincteroplasty                                                  | 1 | 0.0% | 0.0 | 0.0% | 0.0% | 0.0% | 0.0% | 0.0% | 0.0% |
| 45 to 64 years | Transfer of adductor to ischium                                                                   | 1 | 0.0% | 0.0 | 0.0% | 0.0% | 0.0% | 0.0% | 0.0% | 0.0% |
| 45 to 64 years | Transfer of tendon or muscle, hamstrings to femur                                                 | 1 | 0.0% | 0.0 | 0.0% | 0.0% | 0.0% | 0.0% | 0.0% | 0.0% |
| 45 to 64 years | Ureterolithotomy - open                                                                           | 1 | 0.0% | 0.0 | 0.0% | 0.0% | 0.0% | 0.0% | 0.0% | 0.0% |
| 45 to 64 years | Vesiculotomy                                                                                      | 1 | 0.0% | 0.0 | 0.0% | 0.0% | 0.0% | 0.0% | 0.0% | 0.0% |

**eAppendix 4. List of Opioids and Their MME Conversion Factors**

| <b>Opioid (strength in mg except where noted)</b>  | <b>MME Conversion Factor</b> |
|----------------------------------------------------|------------------------------|
| Buprenorphine, transdermal patch (MCG/HR)          | 12.6                         |
| Buprenorphine, buccal film (MCG)                   | 0.03                         |
| Butorphanol                                        | 7                            |
| Codeine                                            | 0.15                         |
| Dihydrocodeine                                     | 0.25                         |
| Fentanyl, buccal/SL tablet or lozenge/troche (MCG) | 0.13                         |
| Fentanyl, film or oral spray (MCG)                 | 0.18                         |
| Fentanyl, nasal spray (MCG)                        | 0.16                         |
| Fentanyl, transdermal patch (MCG/HR)               | 7.2                          |
| Hydrocodone                                        | 1                            |
| Hydromorphone                                      | 4                            |
| Levomethadyl acetate                               | 8                            |
| Levorphanol tartrate                               | 11                           |
| Meperidine                                         | 0.1                          |
| Methadone                                          | 3                            |
| Morphine                                           | 1                            |
| Opium                                              | 1                            |
| Oxycodone                                          | 1.5                          |
| Oxymorphone                                        | 3                            |
| Pentazocine                                        | 0.37                         |
| Propoxyphene                                       | 0.23                         |
| Tapentadol                                         | 0.4                          |
| Tramadol                                           | 0.1                          |
