# Supplementary material for: Epidemiology of Opioid Prescribing After Discharge From Surgical Procedures Among Adults
Source: PubMed Central journal article supplement — JAMA Netw Open. 2024 Jun 26;7(6):e2417651. doi: 10.1001/jamanetworkopen.2024.17651 (PMC11208979; doi:10.1001/jamanetworkopen.2024.17651), 2024-06-26
Supplement: jamanetwopen-e2417651-s003.pdf [file jamanetwopen-e2417651-s003.pdf]

## Data Sharing Statement

Alessio-Bilowus. Epidemiology of Opioid Prescribing After Discharge From Surgical Procedures Among Adults. *JAMA Netw Open*. Published June 26, 2024.  
doi:10.1001/jamanetworkopen.2024.17651

### Data

**Data available:** No

### Additional Information

**Who can access the data:** Complete results will be available publicly along with this article as supplemental digital content

**Types of analyses:** For any purpose

**Mechanisms of data availability:** Complete results will be available publicly along with this article as supplemental digital content
